# Supplementary material for: Bubbles and asset supply
Source: Royal Society of Chemistry journal article supplement (doi:10.1039/c9cc03363g), 2013-01-01

*Supporting Information for*

**Molybdenum-Silver Co-catalyzed Cycloaddition of Alkynes with  
*N*-Isocyanoiminotriphenylphosphorane (NIITP): an Efficient  
Strategy for the Synthesis of Monosubstituted Pyrazoles**

Pengbing, Mi,<sup>b</sup> Jiajia, Lang,<sup>c</sup> Shaojian, Lin\*<sup>a</sup>

<sup>a</sup>Sichuan University, College of Light Industry and Textile and Food Engineering, Sichuan University, Chengdu 610065, China

<sup>b</sup>Institute of Fundamental and Frontier Sciences, University of Electronic Science and Technology of China, Chengdu 610054, China

<sup>c</sup>Research Center for Medicine, University of South China, Hengyang 421001, China

Corresponding author E-mail: sjlin@scu.edu.cn

## Contents

|                                                                  |    |
|------------------------------------------------------------------|----|
| I. General information .....                                     | 2  |
| II Synthesis and spectra data of 3a-3u.....                      | 2  |
| III. Synthesis and spectra data of 5a-5k .....                   | 12 |
| IV. <sup>1</sup> H- and <sup>13</sup> C-NMR spectra copies ..... | 18 |

## I. General information

All reagents were purchased from commercial sources and used without treatment, unless otherwise indicated. The products were purified by column chromatography over silica gel.  $^1\text{H}$ -NMR and  $^{13}\text{C}$ -NMR spectra were recorded at 25 °C on a Varian 500 MHz and 125 MHz, and BRUKER 600 MHz and 150 MHz respectively, and TMS was used as internal standard. Mass spectra were recorded on BRUKER AutoflexIII Smartbeam MS-spectrometer. High resolution mass spectra (HRMS) were recorded on Bruker microTof by using ESI method. High Performance Liquid Chromatography were recorded on Agilent Technologies Inc.1220.

## II Synthesis and spectra data of 3a-3u

Typical synthetic procedure:

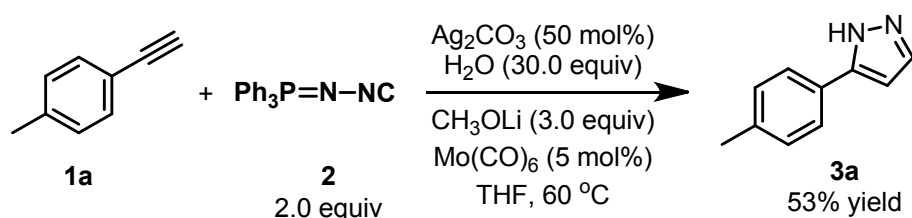

The mixture of **2** (181 mg, 0.6 mmol),  $\text{CH}_3\text{OLi}$  (34.2 mg, 0.9 mmol),  $\text{Mo}(\text{CO})_6$  (4 mg, 0.015 mmol) and  $\text{Ag}_2\text{CO}_3$  (41.4 mg, 0.15 mmol) were added in a Schlenk tube. After evacuated and refilled with nitrogen 3 times, tetrahydrofuran (2.5 ml), **1b** (34.8 mg, 0.3 mmol) and  $\text{H}_2\text{O}$  (162  $\mu\text{l}$ , 9 mmol) was added in one portion to the tube by syringe, follow stirred for 12 h at 60 °C. After completed, the reaction mixture was cooled to room temperature and quenched with water. The organic layer was extracted with 2M HCl (20 ml  $\times$  3), then use NaOH to adjust the aqueous layer's pH to 12-13, then the aqueous layer was extracted with  $\text{CH}_2\text{Cl}_2$  (100 ml  $\times$  3). The combined organic layers were dried over  $\text{MgSO}_4$  and filtered, evacuated under vacuum. The residue was purified by column chromatography (PE : EA = 2 : 1) to give **3a** 36.1 mg (76%).

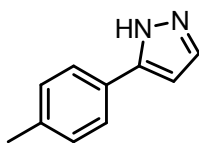

### (3a) 5(3)-4-Tolyl-1H-pyrazole <sup>1</sup>

White Solid (36.1 mg, 76%);  $^1\text{H}$  NMR (600 MHz,  $\text{CDCl}_3$ )  $\delta$  11.95 (s, 1H), 7.64 (d,  $J$  = 8.0 Hz, 2H), 7.59 (s, 1H), 7.20 (d,  $J$  = 8.0 Hz, 2H), 6.56 (s, 1H), 2.37 (s, 3H);  $^{13}\text{C}$  NMR (150 MHz,  $\text{CDCl}_3$ )  $\delta$  148.6, 138.1, 133.6, 129.5, 128.7, 125.8, 102.4, 21.2; HRMS (ESI)  $m/z$  calculated  $\text{C}_{10}\text{H}_{11}\text{N}_2$   $[\text{M}+\text{H}]^+$  159.0937, found 159.0917.

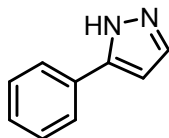

### (3b) 5(3)-Phenyl-1H-pyrazole <sup>1</sup>

The mixture of 2 (181 mg, 0.6 mmol), CH<sub>3</sub>OLi (34.2 mg, 0.9 mmol), Mo(CO)<sub>6</sub> (4 mg, 0.015 mmol) and Ag<sub>2</sub>CO<sub>3</sub> (41.4 mg, 0.15 mmol) were added in a Schlenk tube. After evacuated and refilled with nitrogen 3 times, tetrahydrofuran (2.5 ml), 1b (31.6 mg, 0.3 mmol) and H<sub>2</sub>O (162 μl, 9 mmol) was added in one portion to the tube by syringe, follow stirred for 12 h at 60 °C. After completed, the reaction mixture was cooled to room temperature and quenched with water. The organic layer was extracted with 2M HCl (20 ml × 3), then use NaOH to adjust the aqueous layer's pH to 12-13, then the aqueous layer was extracted with CH<sub>2</sub>Cl<sub>2</sub> (100 ml × 3). The combined organic layers were dried over MgSO<sub>4</sub> and filtered, evacuated under vacuum. The residue was purified by column chromatography (PE : EA = 2 : 1) to give 3b 27.6 mg (64%).

White Solid; <sup>1</sup>H NMR (600 MHz, CDCl<sub>3</sub>) δ 11.63 (s, 1H), 7.75 (d, *J* = 7.2 Hz, 2H), 7.60 (d, *J* = 2.4 Hz, 1H), 7.39 (t, *J* = 7.2 Hz, 2H), 7.32 (t, *J* = 7.2 Hz, 1H), 6.60 (d, *J* = 2.4 Hz, 1H); <sup>13</sup>C NMR (150 MHz, CDCl<sub>3</sub>) δ 149.2, 133.5, 132.2, 128.7, 128.0, 125.9, 102.6; HRMS (ESI) *m/z* calculated C<sub>9</sub>H<sub>9</sub>N<sub>2</sub> [M+H]<sup>+</sup> 145.0760, found 145.0760.

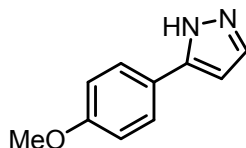

### (3c) 5(3)-(4-Methoxyphenyl)-1H-pyrazole <sup>1</sup>

The mixture of 1c (39.6 mg, 0.3 mmol), 2 (181 mg, 0.6 mmol), CH<sub>3</sub>OLi (34.2 mg, 0.9 mmol), Mo(CO)<sub>6</sub> (4 mg, 0.015 mmol) and Ag<sub>2</sub>CO<sub>3</sub> (41.4 mg, 0.15 mmol) were added in a Schlenk tube. After evacuated and refilled with nitrogen 3 times, tetrahydrofuran (2.5 ml) and H<sub>2</sub>O (162 μl, 9 mmol) was added in one portion to the tube by syringe, follow stirred for 12 h at 60 °C. After completed, the reaction mixture was cooled to room temperature and quenched with water. The organic layer was extracted with 2M HCl (20 ml × 3), then use NaOH to adjust the aqueous layer's pH to 12-13, then the aqueous layer was extracted with CH<sub>2</sub>Cl<sub>2</sub> (100 ml × 3). The combined organic layers were dried over MgSO<sub>4</sub> and filtered, evacuated under vacuum. The residue was purified by column chromatography (PE : EA = 2 : 1) to give 3c 40.2 mg (77%).

White Solid; <sup>1</sup>H NMR (600 MHz, CDCl<sub>3</sub>) δ 12.23 (s, 1H), 7.66 (d, *J* = 8.4 Hz, 2H), 7.57 (d, *J* = 2.2 Hz, 1H), 6.90 (d, *J* = 8.4 Hz, 2H), 6.51 (d, *J* = 2.2 Hz, 1H), 3.82 (s, 3H); <sup>13</sup>C NMR (150 MHz, CDCl<sub>3</sub>) δ 159.5, 148.4, 133.6, 127.1, 124.8, 114.1, 102.0, 55.3; HRMS (ESI) *m/z* calculated C<sub>10</sub>H<sub>11</sub>N<sub>2</sub>O [M+H]<sup>+</sup> 175.0873, found 175.0866.

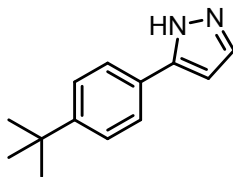

### (3d) 5(3)-(4-(tert-butyl)phenyl)-1H-pyrazole

The mixture of 2 (181 mg, 0.6 mmol), CH<sub>3</sub>OLi (34.2 mg, 0.9 mmol), Mo(CO)<sub>6</sub> (4 mg, 0.015 mmol) and Ag<sub>2</sub>CO<sub>3</sub> (41.4 mg, 0.15 mmol) were added in a Schlenk tube. After evacuated and

refilled with nitrogen 3 times, tetrahydrofuran (2.5 ml), 1d (47.5 mg, 0.3 mmol) and H<sub>2</sub>O (162 μl, 9 mmol) was added in one portion to the tube by syringe, follow stirred for 12 h at 60 °C. After completed, the reaction mixture was cooled to room temperature and quenched with water. Then the aqueous layer was extracted with CH<sub>2</sub>Cl<sub>2</sub> (100 ml × 3). The combined organic layers were dried over MgSO<sub>4</sub> and filtered, evacuated under vacuum. The residue was purified by column chromatography (PE : EA = 5 : 1) to give 3d 31.8 mg (53%).

Light Yellow Solid; mp: 53-55°C; <sup>1</sup>H NMR (600 MHz, CDCl<sub>3</sub>) δ 10.85 (s, 1H), 7.68 (d, *J* = 8.2 Hz, 2H), 7.59 (d, *J* = 1.2 Hz, 1H), 7.42 (d, *J* = 8.2 Hz, 2H), 6.57 (d, *J* = 1.2 Hz, 1H), 1.34 (s, 9H); <sup>13</sup>C NMR (150 MHz, CDCl<sub>3</sub>) δ 151.1, 148.5, 133.8, 129.1, 125.7, 125.5, 102.4, 34.6, 31.3; HRMS (ESI) *m/z* calculated C<sub>13</sub>H<sub>17</sub>N<sub>2</sub> [M+H]<sup>+</sup> 201.1395, found 201.1386.

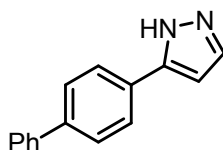

### (3e) 5(3)-(4-[1,1'-biphenyl]-4-yl)-1H-pyrazole

The mixture of 1e (53.5 mg, 0.3 mmol), 2 (181 mg, 0.6 mmol), CH<sub>3</sub>OLi (34.2 mg, 0.9 mmol), Mo(CO)<sub>6</sub> (4 mg, 0.015 mmol) and Ag<sub>2</sub>CO<sub>3</sub> (41.4 mg, 0.15 mmol) were added in a Schlenk tube. After evacuated and refilled with nitrogen 3 times, tetrahydrofuran (2.5 ml) and H<sub>2</sub>O (162 μl, 9 mmol) was added in one portion to the tube by syringe, follow stirred for 12 h at 60 °C. After completed, the reaction mixture was cooled to room temperature and quenched with water. Then the aqueous layer was extracted with CH<sub>2</sub>Cl<sub>2</sub> (100 ml × 3). The combined organic layers were dried over MgSO<sub>4</sub> and filtered, evacuated under vacuum. The residue was purified by column chromatography (PE : EA = 5 : 1) to give 3e 40.3 mg (61%).

White Solid; mp: 151-153 °C; <sup>1</sup>H-NMR (600 MHz, CDCl<sub>3</sub>) δ 11.63 (s, 1H), 7.83 (d, *J* = 8.4 Hz, 2H), 7.64 – 7.59 (m, 5H), 7.43 (t, *J* = 7.2 Hz, 2H), 7.35 (t, *J* = 7.2 Hz, 1H), 6.65 (s, 1H); <sup>13</sup>C-NMR (150 MHz, CDCl<sub>3</sub>) δ 148.8, 140.7, 140.5, 133.3, 131.0, 128.8, 127.4, 127.4, 126.9, 126.2, 102.7, 77.2, 77.0, 76.8.; HRMS (ESI) *m/z* calculated C<sub>15</sub>H<sub>13</sub>N<sub>2</sub> [M+H]<sup>+</sup> 221.1081, found 221.1073.

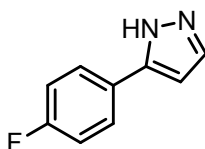

### (3f) 5(3)-(4-fluorophenyl)-1H-pyrazole<sup>1</sup>

The mixture of 2 (181 mg, 0.6 mmol), CH<sub>3</sub>OLi (34.2 mg, 0.9 mmol), Mo(CO)<sub>6</sub> (4 mg, 0.015 mmol) and Ag<sub>2</sub>CO<sub>3</sub> (41.4 mg, 0.15 mmol) were added in a Schlenk tube. After evacuated and refilled with nitrogen 3 times, tetrahydrofuran (2.5 ml), 1f (36.0 mg, 0.3 mmol) and H<sub>2</sub>O (162 μl, 9 mmol) was added in one portion to the tube by syringe, follow stirred for 12 h at 60 °C. After completed, the reaction mixture was cooled to room temperature and quenched with water. The organic layer was extracted with 2M HCl (20 ml × 3), then use NaOH to adjust the aqueous layer's pH to 12-13, then the aqueous layer was extracted with CH<sub>2</sub>Cl<sub>2</sub> (100 ml × 3). The combined organic layers were dried over MgSO<sub>4</sub> and filtered, evacuated under vacuum. The residue was purified by column chromatography (PE : EA = 2 : 1) to give 3f 36.0 mg (74%).

White Solid; <sup>1</sup>H-NMR (600 MHz, CDCl<sub>3</sub>) δ 12.09 (s, 1H), 7.72 – 7.65 (m, 2H), 7.55 (d, *J* = 2.2 Hz, 1H), 7.09 – 7.00 (m, 2H), 6.54 (d, *J* = 2.2 Hz, 1H); <sup>13</sup>C-NMR (125 MHz, CDCl<sub>3</sub>) δ 162.6 (d, *J* = 245

Hz), 149.1, 132.3, 128.7, 127.5 (d,  $J = 8.75$  Hz), 115.7 (d,  $J = 22.5$  Hz), 102.6; **HRMS** (ESI)  $m/z$  calculated  $C_9H_8FN_2$   $[M+H]^+$  163.0670, found 163.0666.

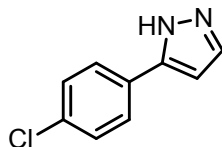

**(3g) 5(3)-(4-chlorophenyl)-1H-pyrazole**<sup>1</sup>

The mixture of 1g (40.8 mg, 0.3 mmol), 2 (181 mg, 0.6 mmol),  $CH_3OLi$  (34.2 mg, 0.9 mmol),  $Mo(CO)_6$  (4 mg, 0.015 mmol) and  $Ag_2CO_3$  (41.4 mg, 0.15 mmol) were added in a Schlenk tube. After evacuated and refilled with nitrogen 3 times, tetrahydrofuran (2.5 ml) and  $H_2O$  (162  $\mu$ l, 9 mmol) was added in one portion to the tube by syringe, follow stirred for 12 h at 60 °C. After completed, the reaction mixture was cooled to room temperature and quenched with water. The organic layer was extracted with 2M HCl (20 ml  $\times$  3), then use NaOH to adjust the aqueous layer's pH to 12-13, then the aqueous layer was extracted with  $CH_2Cl_2$  (100 ml  $\times$  3). The combined organic layers were dried over  $MgSO_4$  and filtered, evacuated under vacuum. The residue was purified by column chromatography (PE : EA = 2 : 1) to give 3g 44.4 mg (83%).

White Solid;  **$^1H$ -NMR** (600 MHz,  $CDCl_3$ )  $\delta$  11.21 (s, 1H), 7.70 (d,  $J = 8.4$  Hz, 2H), 7.61 (d,  $J = 2.4$  Hz, 1H), 7.39 – 7.35 (m, 2H), 6.60 (d,  $J = 1.8$  Hz, 1H);  **$^{13}C$ -NMR** (150 MHz,  $CDCl_3$ )  $\delta$  148.8, 133.8, 132.5, 130.9, 128.9, 127.1, 102.7; **HRMS** (ESI)  $m/z$  calculated  $C_9H_8ClN_2$   $[M+H]^+$  179.0373, found 179.0371.

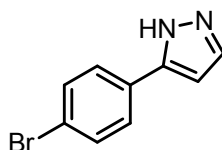

**(3h) 5(3)-(4-bromophenyl)-1H-pyrazole**<sup>1</sup>

The mixture of 1h (55.4 mg, 0.3 mmol), 2 (181 mg, 0.6 mmol),  $CH_3OLi$  (34.2 mg, 0.9 mmol),  $Mo(CO)_6$  (4 mg, 0.015 mmol) and  $Ag_2CO_3$  (41.4 mg, 0.15 mmol) were added in a Schlenk tube. After evacuated and refilled with nitrogen 3 times, tetrahydrofuran (2.5 ml) and  $H_2O$  (162  $\mu$ l, 9 mmol) was added in one portion to the tube by syringe, follow stirred for 12 h at 60 °C. After completed, the reaction mixture was cooled to room temperature and quenched with water. The organic layer was extracted with 4M HCl (20 ml  $\times$  3), then use NaOH to adjust the aqueous layer's pH to 12-13, then the aqueous layer was extracted with  $CH_2Cl_2$  (100 ml  $\times$  3). The combined organic layers were dried over  $MgSO_4$  and filtered, evacuated under vacuum. The residue was purified by column chromatography (PE : EA = 2 : 1) to give 3h 48.2 mg (72%).

White Solid;  **$^1H$ -NMR** (600 MHz,  $CDCl_3$ )  $\delta$  12.52 (s, 1H), 7.59 (d,  $J = 8.4$  Hz, 2H), 7.57 (d,  $J = 2.2$  Hz, 1H), 7.48 (d,  $J = 8.4$  Hz, 2H), 6.57 (d,  $J = 2.2$  Hz, 1H);  **$^{13}C$ -NMR** (150 MHz,  $CDCl_3$ )  $\delta$  148.8, 132.3, 131.8, 131.3, 127.4, 121.9, 102.7; **HRMS** (ESI)  $m/z$  calculated  $C_9H_8BrN_2$   $[M+H]^+$  222.9872, found 222.9865.

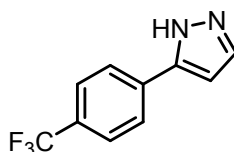

**(3i) 5(3)-(4-(trifluoromethyl)phenyl)-1H-pyrazole**

The mixture of 2 (181 mg, 0.6 mmol), CH<sub>3</sub>OLi (34.2 mg, 0.9 mmol), Mo(CO)<sub>6</sub> (4 mg, 0.015 mmol) and Ag<sub>2</sub>CO<sub>3</sub> (41.4 mg, 0.15 mmol) were added in a Schlenk tube. After evacuated and refilled with nitrogen 3 times, tetrahydrofuran (2.5 ml), 1i (52.1 mg, 0.3 mmol) and H<sub>2</sub>O (162 μl, 9 mmol) was added in one portion to the tube by syringe, follow stirred for 12 h at 60 °C. After completed, the reaction mixture was cooled to room temperature and quenched with water. The organic layer was extracted with 6M HCl (20 ml × 3), then use NaOH to adjust the aqueous layer's pH to 12-13, then the aqueous layer was extracted with CH<sub>2</sub>Cl<sub>2</sub> (100 ml × 3). The combined organic layers were dried over MgSO<sub>4</sub> and filtered, evacuated under vacuum. The residue was purified by column chromatography (PE : EA = 2 : 1) to give 3i 48.3 mg (76%).

White Solid; mp: 106-108 °C; **<sup>1</sup>H-NMR** (600 MHz, CDCl<sub>3</sub>) δ 11.60 (s, 1H), 7.88 (d, *J* = 7.8 Hz, 2H), 7.66 – 7.63 (m, 3H), 6.68 (d, *J* = 2.4 Hz, 1H); **<sup>13</sup>C-NMR** (150 MHz, CDCl<sub>3</sub>) δ 149.1, 135.9, 131.9, 129.9 (q, *J* = 18.0 Hz), 126.0, 125.7 (q, *J* = 3.0 Hz), 124.1 (q, *J* = 270.0 Hz), 103.3; **HRMS** (ESI) *m/z* calculated C<sub>10</sub>H<sub>8</sub>F<sub>3</sub>N<sub>2</sub> [M+H]<sup>+</sup> 213.0642, found 213.0634.

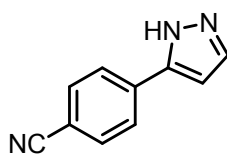

**(3j) 5(3)-(4-cyanogroupphenyl)-1H-pyrazole** <sup>2</sup>

The mixture of 2 (181 mg, 0.6 mmol), CH<sub>3</sub>OLi (34.2 mg, 0.9 mmol), Mo(CO)<sub>6</sub> (4 mg, 0.015 mmol) and Ag<sub>2</sub>CO<sub>3</sub> (41.4 mg, 0.15 mmol) were added in a Schlenk tube. After evacuated and refilled with nitrogen 3 times, tetrahydrofuran (2.5 ml), 1j (39.3 mg, 0.3 mmol) and H<sub>2</sub>O (162 μl, 9 mmol) was added in one portion to the tube by syringe, follow stirred for 12 h at 60 °C. After completed, the reaction mixture was cooled to room temperature and quenched with water. The organic layer was extracted with 2M HCl (20 ml × 3), then use NaOH to adjust the aqueous layer's pH to 12-13, then the aqueous layer was extracted with CH<sub>2</sub>Cl<sub>2</sub> (100 ml × 3). The combined organic layers were dried over MgSO<sub>4</sub> and filtered, evacuated under vacuum. The residue was purified by column chromatography (PE : EA = 2 : 1) to give 3j 34.5 mg (68%).

White Solid; **<sup>1</sup>H-NMR** (600 MHz, CDCl<sub>3</sub>) δ 11.10 (s, 1H), 7.91 (d, *J* = 7.8 Hz, 2H), 7.69 (d, *J* = 7.8 Hz, 2H), 7.66 (d, *J* = 2.4 Hz, 1H), 6.71 (d, *J* = 1.8 Hz, 1H); **<sup>13</sup>C-NMR** (150 MHz, CDCl<sub>3</sub>) δ 149.1, 137.2, 132.6, 131.3, 126.1, 118.9, 111.1, 103.5; **HRMS** (ESI) *m/z* calculated C<sub>10</sub>H<sub>8</sub>N<sub>3</sub> [M+H]<sup>+</sup> 170.0719, found 170.0713.

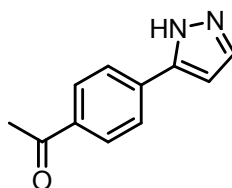

**(3k) 5(3)-(4-ethanoylphenyl)-1H-pyrazole**

The mixture of 1k (43.3 mg, 0.3 mmol), 2 (181 mg, 0.6 mmol), CH<sub>3</sub>OLi (34.2 mg, 0.9 mmol), Mo(CO)<sub>6</sub> (4 mg, 0.015 mmol) and Ag<sub>2</sub>CO<sub>3</sub> (41.4 mg, 0.15 mmol) were added in a Schlenk tube. After evacuated and refilled with nitrogen 3 times, tetrahydrofuran (2.5 ml) and H<sub>2</sub>O (162 μl, 9 mmol) was added in one portion to the tube by syringe, follow stirred for 12 h at 60 °C. After completed, the reaction mixture was cooled to room temperature and quenched with water. The organic layer was extracted with 4M HCl (20 ml × 3), then use NaOH to adjust the aqueous layer's pH to 12-13, then the aqueous layer was extracted with CH<sub>2</sub>Cl<sub>2</sub> (100 ml × 3). The

combined organic layers were dried over  $\text{MgSO}_4$  and filtered, evacuated under vacuum. The residue was purified by column chromatography (PE : EA = 2 : 1) to give 3k 41.9 mg (75%). White Solid; mp: 136-138 °C;  $^1\text{H-NMR}$  (600 MHz,  $\text{CDCl}_3$ )  $\delta$  10.37 (s, 1H), 8.02 (d,  $J = 8.4$  Hz, 2H), 7.90 (d,  $J = 7.8$  Hz, 2H), 7.66 (d,  $J = 2.4$  Hz, 1H), 6.73 (d,  $J = 2.4$  Hz, 1H), 2.64 (s, 3H);  $^{13}\text{C-NMR}$  (150 MHz,  $\text{CDCl}_3$ )  $\delta$  197.7, 149.1, 137.0, 136.3, 131.9, 128.9, 125.7, 103.4, 26.6.; **HRMS** (ESI)  $m/z$  calculated  $\text{C}_{11}\text{H}_{11}\text{N}_2\text{O}$   $[\text{M}+\text{H}]^+$  187.0869, found 187.0866.

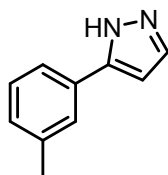

### (3l) 5(3)-3-Tolyl-1H-pyrazole

The mixture of 2 (181 mg, 0.6 mmol),  $\text{CH}_3\text{OLi}$  (34.2 mg, 0.9 mmol),  $\text{Mo}(\text{CO})_6$  (4 mg, 0.015 mmol) and  $\text{Ag}_2\text{CO}_3$  (41.4 mg, 0.15 mmol) were added in a Schlenk tube. After evacuated and refilled with nitrogen 3 times, tetrahydrofuran (2.5 ml), 1l (34.8 mg, 0.3 mmol) and  $\text{H}_2\text{O}$  (162  $\mu\text{l}$ , 9 mmol) was added in one portion to the tube by syringe, follow stirred for 12 h at 60 °C. After completed, the reaction mixture was cooled to room temperature and quenched with water. The organic layer was extracted with 2M HCl (20 ml  $\times$  3), then use NaOH to adjust the aqueous layer's pH to 12-13, then the aqueous layer was extracted with  $\text{CH}_2\text{Cl}_2$  (100 ml  $\times$  3). The combined organic layers were dried over  $\text{MgSO}_4$  and filtered, evacuated under vacuum. The residue was purified by column chromatography (PE : EA = 2 : 1) to give 3l 26.6 mg (56%). Light Yellow Oil;  $^1\text{H-NMR}$  (600 MHz,  $\text{CDCl}_3$ )  $\delta$  12.15 (s, 1H), 7.57 (d,  $J = 2.2$  Hz, 2H), 7.53 (d,  $J = 7.8$  Hz, 1H), 7.26 (t,  $J = 7.2$  Hz, 1H), 7.13 (d,  $J = 6.6$  Hz, 1H), 6.58 (d,  $J = 2.2$  Hz, 1H), 2.35 (s, 3H);  $^{13}\text{C-NMR}$  (150 MHz,  $\text{CDCl}_3$ )  $\delta$  149.1, 138.4, 134.2, 132.0, 128.7, 128.7, 126.5, 123.0, 102.5, 21.4; **HRMS** (ESI)  $m/z$  calculated  $\text{C}_{10}\text{H}_{11}\text{N}_2$   $[\text{M}+\text{H}]^+$  159.0912, found 159.0917.

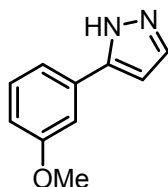

### (3m) 5(3)-(3-Methoxyphenyl)-1H-pyrazole <sup>1</sup>

The mixture of 2 (181 mg, 0.6 mmol),  $\text{CH}_3\text{OLi}$  (34.2 mg, 0.9 mmol),  $\text{Mo}(\text{CO})_6$  (4 mg, 0.015 mmol) and  $\text{Ag}_2\text{CO}_3$  (41.4 mg, 0.15 mmol) were added in a Schlenk tube. After evacuated and refilled with nitrogen 3 times, tetrahydrofuran (2.5 ml), 1m (39.6 mg, 0.3 mmol) and  $\text{H}_2\text{O}$  (162  $\mu\text{l}$ , 9 mmol) was added in one portion to the tube by syringe, follow stirred for 12 h at 60 °C. After completed, the reaction mixture was cooled to room temperature and quenched with water. The organic layer was extracted with 2M HCl (20 ml  $\times$  3), then use NaOH to adjust the aqueous layer's pH to 12-13, then the aqueous layer was extracted with  $\text{CH}_2\text{Cl}_2$  (100 ml  $\times$  3). The combined organic layers were dried over  $\text{MgSO}_4$  and filtered, evacuated under vacuum. The residue was purified by column chromatography (PE : EA = 2 : 1) to give 3m 34.0 mg (65%). White Solid;  $^1\text{H-NMR}$  (600 MHz,  $\text{CDCl}_3$ )  $\delta$  12.53 (s, 1H), 7.57 (d,  $J = 1.8$  Hz, 1H), 7.35 – 7.30 (m, 2H), 7.29 (t,  $J = 7.8$  Hz, 1H), 6.86 (ddd,  $J = 7.8, 2.4, 1.2$  Hz, 1H), 6.58 (d,  $J = 2.4$  Hz, 1H), 3.78 (d,  $J = 1.2$  Hz, 3H);  $^{13}\text{C-NMR}$  (150 MHz,  $\text{CDCl}_3$ )  $\delta$  159.9, 149.2, 133.5, 133.1, 129.8, 118.4, 113.8, 111.1, 102.7, 55.2; **HRMS** (ESI)  $m/z$  calculated  $\text{C}_{10}\text{H}_{11}\text{N}_2\text{O}$   $[\text{M}+\text{H}]^+$  175.0852, found 175.0866.



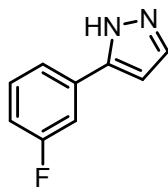

**(3n) 5(3)-(3-fluorophenyl)-1H-pyrazole**

The mixture of **2** (181 mg, 0.6 mmol), CH<sub>3</sub>OLi (34.2 mg, 0.9 mmol), Mo(CO)<sub>6</sub> (4 mg, 0.015 mmol) and Ag<sub>2</sub>CO<sub>3</sub> (41.4 mg, 0.15 mmol) were added in a Schlenk tube. After evacuated and refilled with nitrogen 3 times, tetrahydrofuran (2.5 ml), **1n** (36.0 mg, 0.3 mmol) and H<sub>2</sub>O (162 μl, 9 mmol) was added in one portion to the tube by syringe, follow stirred for 12 h at 60 °C. After completed, the reaction mixture was cooled to room temperature and quenched with water. The organic layer was extracted with 2M HCl (20 ml × 3), then use NaOH to adjust the aqueous layer's pH to 12-13, then the aqueous layer was extracted with CH<sub>2</sub>Cl<sub>2</sub> (100 ml × 3). The combined organic layers were dried over MgSO<sub>4</sub> and filtered, evacuated under vacuum. The residue was purified by column chromatography (PE : EA = 2 : 1) to give **3n** 34.5 mg (71%).

White Solid; mp: 62-64 °C; <sup>1</sup>H-NMR (600 MHz, CDCl<sub>3</sub>) δ 12.26 (s, 1H), 7.59 (d, *J* = 2.4 Hz, 1H), 7.53 (d, *J* = 7.8 Hz, 1H), 7.46 (d, *J* = 10.2 Hz, 1H), 7.37 – 7.30 (m, 1H), 7.01 (td, *J* = 8.4, 1.8 Hz, 1H), 6.60 (d, *J* = 2.4 Hz, 1H); <sup>13</sup>C-NMR (150 MHz, CDCl<sub>3</sub>) δ 163.1 (d, *J* = 203 Hz), 149.1, 134.7, 132.7, 130.3 (d, *J* = 7.5 Hz), 121.5 (d, *J* = 2.5 Hz), 114.7 (d, *J* = 17.5 Hz), 112.7 (d, *J* = 18.75 Hz), 102.9; HRMS (ESI) *m/z* calculated C<sub>9</sub>H<sub>7</sub>FN<sub>2</sub> [M+H]<sup>+</sup> 163.0627, found 163.0752.

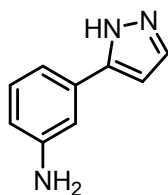

**(3o) 5(3)-(3-aminophenyl)-1H-pyrazole**

The mixture of **2** (181 mg, 0.6 mmol), CH<sub>3</sub>OLi (34.2 mg, 0.9 mmol), Mo(CO)<sub>6</sub> (4 mg, 0.015 mmol) and Ag<sub>2</sub>CO<sub>3</sub> (41.4 mg, 0.15 mmol) were added in a Schlenk tube. After evacuated and refilled with nitrogen 3 times, tetrahydrofuran (2.5 ml), **1o** (35.9 mg, 0.3 mmol) and H<sub>2</sub>O (162 μl, 9 mmol) was added in one portion to the tube by syringe, follow stirred for 12 h at 60 °C. After completed, the reaction mixture was cooled to room temperature and quenched with water. The organic layer was extracted with 2M HCl (20 ml × 3), then use NaOH to adjust the aqueous layer's pH to 12-13, then the aqueous layer was extracted with CH<sub>2</sub>Cl<sub>2</sub> (100 ml × 6). The combined organic layers were dried over MgSO<sub>4</sub> and filtered, evacuated under vacuum. The residue was purified by column chromatography (PE : EA = 1 : 1) to give **3o** 24.4 mg (51%).

Light yellow Solid; mp: 115-117 °C; <sup>1</sup>H-NMR (600 MHz, CDCl<sub>3</sub>) δ 7.56 (d, *J* = 2.4 Hz, 1H), 7.16 (t, *J* = 7.8 Hz, 1H), 7.12 (d, *J* = 7.8 Hz, 1H), 7.06 (s, 1H), 6.62 (dd, *J* = 7.8, 1.2 Hz, 1H), 6.53 (d, *J* = 2.4 Hz, 1H); <sup>13</sup>C-NMR (150 MHz, CDCl<sub>3</sub>) δ 148.5, 146.8, 133.8, 132.8, 129.7, 116.3, 114.9, 112.3, 102.6; HRMS (ESI) *m/z* calculated C<sub>9</sub>H<sub>10</sub>N<sub>3</sub> [M+H]<sup>+</sup> 160.0862, found 160.0869.

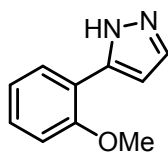

**(3p) 5(3)-(2-Methoxyphenyl)-1H-pyrazole<sup>3</sup>**

The mixture of **2** (181 mg, 0.6 mmol), CH<sub>3</sub>OLi (34.2 mg, 0.9 mmol), Mo(CO)<sub>6</sub> (4 mg, 0.015 mmol) and Ag<sub>2</sub>CO<sub>3</sub> (41.4 mg, 0.15 mmol) were added in a Schlenk tube. After evacuated and refilled with nitrogen 3 times, tetrahydrofuran (2.5 ml), **1p** (39.6 mg, 0.3 mmol) and H<sub>2</sub>O (162 μl, 9 mmol) was added in one portion to the tube by syringe, follow stirred for 12 h at 60 °C. After completed, the reaction mixture was cooled to room temperature and quenched with water. The organic layer was extracted with 2M HCl (20 ml × 3), then use NaOH to adjust the aqueous layer's pH to 12-13, then the aqueous layer was extracted with CH<sub>2</sub>Cl<sub>2</sub> (100 ml × 3). The combined organic layers were dried over MgSO<sub>4</sub> and filtered, evacuated under vacuum. The residue was purified by column chromatography (PE : EA = 2 : 1) to give **3p** 33.9 mg (65%).

White Solid; <sup>1</sup>H NMR (600 MHz, CDCl<sub>3</sub>) δ 11.43 (s, 1H), 7.69 (dd, *J* = 7.8, 1.2 Hz, 1H), 7.61 (d, *J* = 1.8 Hz, 1H), 7.33 – 7.28 (m, 1H), 7.06 – 7.00 (m, 2H), 6.65 (d, *J* = 1.8 Hz, 1H), 3.97 (s, 3H); <sup>13</sup>C-NMR (150 MHz, CDCl<sub>3</sub>) δ 155.8, 141.2, 139.1, 129.1, 128.0, 121.3, 118.1, 111.5, 102.8, 55.7; HRMS (ESI) *m/z* calculated C<sub>10</sub>H<sub>11</sub>N<sub>2</sub>O [M+H]<sup>+</sup> 175.0865, found 175.0866.

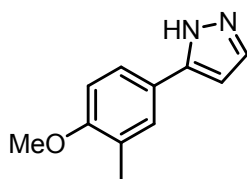

**(3q) 5(3)-(4-methoxy-3-methylphenyl)-1H-pyrazole**

The mixture of **2** (181 mg, 0.6 mmol), CH<sub>3</sub>OLi (34.2 mg, 0.9 mmol), Mo(CO)<sub>6</sub> (4 mg, 0.015 mmol) and Ag<sub>2</sub>CO<sub>3</sub> (41.4 mg, 0.15 mmol) were added in a Schlenk tube. After evacuated and refilled with nitrogen 3 times, tetrahydrofuran (2.5 ml), **1q** (43.8 mg, 0.3 mmol) and H<sub>2</sub>O (162 μl, 9 mmol) was added in one portion to the tube by syringe, follow stirred for 12 h at 60 °C. After completed, the reaction mixture was cooled to room temperature and quenched with water. The organic layer was extracted with 2M HCl (20 ml × 3), then use NaOH to adjust the aqueous layer's pH to 12-13, then the aqueous layer was extracted with CH<sub>2</sub>Cl<sub>2</sub> (100 ml × 3). The combined organic layers were dried over MgSO<sub>4</sub> and filtered, evacuated under vacuum. The residue was purified by column chromatography (PE : EA = 2 : 1) to give **3q** 32.2 mg (57%).

Light Yellow Solid; mp: 101-103 °C; <sup>1</sup>H-NMR (600 MHz, CDCl<sub>3</sub>) δ 10.71 (s, 1H), 7.57 (d, *J* = 2.4 Hz, 1H), 7.51 (s, 2H), 6.80 (d, *J* = 9.0 Hz, 1H), 6.50 (d, *J* = 2.4 Hz, 1H), 3.83 (s, 3H), 2.22 (s, 3H); <sup>13</sup>C-NMR (150 MHz, CDCl<sub>3</sub>) δ 157.7, 148.3, 134.0, 128.3, 126.9, 124.4, 124.1, 110.0, 101.9, 55.3, 16.2; HRMS (ESI) *m/z* calculated C<sub>11</sub>H<sub>13</sub>N<sub>2</sub>O [M+H]<sup>+</sup> 189.1027, found 189.1022.

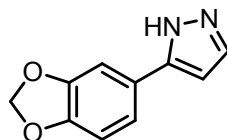

**(3r) 5(3)-(1,3-benzodioxol-5-yl)-1H-pyrazole**

The mixture of **2** (181 mg, 0.6 mmol), CH<sub>3</sub>OLi (34.2 mg, 0.9 mmol), Mo(CO)<sub>6</sub> (4 mg, 0.015 mmol) and Ag<sub>2</sub>CO<sub>3</sub> (41.4 mg, 0.15 mmol) were added in a Schlenk tube. After evacuated and refilled with nitrogen 3 times, tetrahydrofuran (2.5 ml), **1r** (43.8 mg, 0.3 mmol) and H<sub>2</sub>O (162 μl, 9 mmol) was added in one portion to the tube by syringe, follow stirred for 12 h at 60 °C. After completed, the reaction mixture was cooled to room temperature and quenched with water. The organic layer was extracted with 2M HCl (20 ml × 3), then use NaOH to adjust the aqueous layer's pH to 12-13, then the aqueous layer was extracted with CH<sub>2</sub>Cl<sub>2</sub> (100 ml × 3). The

combined organic layers were dried over MgSO<sub>4</sub> and filtered, evacuated under vacuum. The residue was purified by column chromatography (PE : EA = 2 : 1) to give 3r 35.6 mg (63%). White Solid; mp: 105-107 °C; **<sup>1</sup>H-NMR** (600 MHz, CDCl<sub>3</sub>) δ 11.91 (s, 1H), 7.55 (d, *J* = 2.4 Hz, 1H), 7.22 – 7.18 (m, 2H), 6.80 (d, *J* = 8.4 Hz, 1H), 6.48 (d, *J* = 1.8 Hz, 1H), 5.97 (s, 2H); **<sup>13</sup>C-NMR** (150 MHz, CDCl<sub>3</sub>) δ 149.3, 148.0, 147.4, 133.8, 126.6, 119.6, 108.5, 106.5, 102.2, 101.1; **HRMS** (ESI) *m/z* calculated C<sub>10</sub>H<sub>9</sub>N<sub>2</sub>O<sub>2</sub> [M+H]<sup>+</sup> 189.0664, found 189.0659.

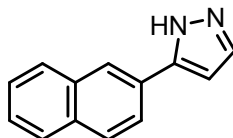

**(3s) 5(3)-(2-naphthalen)-1H-pyrazole**<sup>5</sup>

The mixture of 1s (45.6 mg, 0.3 mmol), 2 (181 mg, 0.6 mmol), CH<sub>3</sub>OLi (34.2 mg, 0.9 mmol), Mo(CO)<sub>6</sub> (4 mg, 0.015 mmol) and Ag<sub>2</sub>CO<sub>3</sub> (41.4 mg, 0.15 mmol) were added in a Schlenk tube. After evacuated and refilled with nitrogen 3 times, tetrahydrofuran (2.5 ml) and H<sub>2</sub>O (162 μl, 9 mmol) was added in one portion to the tube by syringe, follow stirred for 12 h at 60 °C. After completed, the reaction mixture was cooled to room temperature and quenched with water. The organic layer was extracted with 4M HCl (20 ml × 3), then use NaOH to adjust the aqueous layer's pH to 12-13, then the aqueous layer was extracted with CH<sub>2</sub>Cl<sub>2</sub> (100 ml × 3). The combined organic layers were dried over MgSO<sub>4</sub> and filtered, evacuated under vacuum. The residue was purified by column chromatography (PE : EA = 2 : 1) to give 3s 33.2 mg (57%). White Solid; **<sup>1</sup>H-NMR** (600 MHz, CDCl<sub>3</sub>) δ 11.00 (s, 1H), 8.21 (s, 1H), 7.92 (d, *J* = 8.4 Hz, 1H), 7.88 – 7.82 (m, 3H), 7.67 (d, *J* = 2.4 Hz, 1H), 7.50 – 7.45 (m, 2H), 6.75 (d, *J* = 1.8 Hz, 1H); **<sup>13</sup>C-NMR** (150 MHz, CDCl<sub>3</sub>) δ 149.5, 133.5, 133.1, 133.0, 129.6, 128.5, 128.1, 127.7, 126.4, 126.1, 124.4, 124.0, 103.0; **HRMS** (ESI) *m/z* calculated C<sub>13</sub>H<sub>11</sub>N<sub>2</sub> [M+H]<sup>+</sup> 195.0918, found 195.0917.

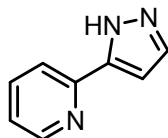

**(3t) 5(3)-(2-pyridine)-1H-pyrazole**<sup>4</sup>

The mixture of 2 (181 mg, 0.6 mmol), CH<sub>3</sub>OLi (34.2 mg, 0.9 mmol), Mo(CO)<sub>6</sub> (4 mg, 0.015 mmol) and Ag<sub>2</sub>CO<sub>3</sub> (41.4 mg, 0.15 mmol) were added in a Schlenk tube. After evacuated and refilled with nitrogen 3 times, tetrahydrofuran (2.5 ml), 1t (30.9 mg, 0.3 mmol) and H<sub>2</sub>O (162 μl, 9 mmol) was added in one portion to the tube by syringe, follow stirred for 12 h at 60 °C. After completed, the reaction mixture was cooled to room temperature and quenched with water. The organic layer was extracted with 2M HCl (20 ml × 3), then use NaOH to adjust the aqueous layer's pH to 12-13, then the aqueous layer was extracted with CH<sub>2</sub>Cl<sub>2</sub> (100 ml × 3). The combined organic layers were dried over MgSO<sub>4</sub> and filtered, evacuated under vacuum. The residue was purified by column chromatography (PE : EA = 2 : 1) to give 3t 26.1 mg (60%). White Solid; **<sup>1</sup>H-NMR** (600 MHz, CDCl<sub>3</sub>) δ 12.11 (s, 1H), 8.68 (d, *J* = 4.8 Hz, 1H), 7.80 – 7.71 (m, 2H), 7.67 (d, *J* = 1.8 Hz, 1H), 7.24 (dd, *J* = 8.4, 4.8 Hz, 1H), 6.81 (s, 1H); **<sup>13</sup>C-NMR** (125 MHz, CDCl<sub>3</sub>) δ 149.4, 144.5, 137.5, 137.0, 122.8, 120.2, 103.4; **HRMS** (ESI) *m/z* calculated C<sub>8</sub>H<sub>8</sub>N<sub>3</sub> [M+H]<sup>+</sup> 146.0719, found 146.0713.

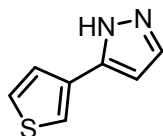

### (3u) 5(3)-(Thien-3-yl)-1H-pyrazole

The mixture of 2 (181 mg, 0.6 mmol), CH<sub>3</sub>OLi (34.2 mg, 0.9 mmol), Mo(CO)<sub>6</sub> (4 mg, 0.015 mmol) and Ag<sub>2</sub>CO<sub>3</sub> (41.4 mg, 0.15 mmol) were added in a Schlenk tube. After evacuated and refilled with nitrogen 3 times, tetrahydrofuran (2.5 ml), 1u (32.4 mg, 0.3 mmol) and H<sub>2</sub>O (162 μl, 9 mmol) was added in one portion to the tube by syringe, follow stirred for 12 h at 60 °C. After completed, the reaction mixture was cooled to room temperature and quenched with water. The organic layer was extracted with 2M HCl (20 ml × 3), then use NaOH to adjust the aqueous layer's pH to 12-13, then the aqueous layer was extracted with CH<sub>2</sub>Cl<sub>2</sub> (100 ml × 3). The combined organic layers were dried over MgSO<sub>4</sub> and filtered, evacuated under vacuum. The residue was purified by column chromatography (PE : EA = 2 : 1) to give 3u 32.4 mg (72%).

White Solid; mp: 102-104 °C; **<sup>1</sup>H-NMR** (600 MHz, CDCl<sub>3</sub>) δ 12.46 (s, 1H), 7.55 (d, *J* = 1.8 Hz, 1H), 7.52 (dd, *J* = 3.0, 1.2 Hz, 1H), 7.41 (dd, *J* = 5.4, 1.2 Hz, 1H), 7.33 (dd, *J* = 4.8, 3.0 Hz, 1H), 6.48 (d, *J* = 2.4 Hz, 1H); **<sup>13</sup>C-NMR** (CDCl<sub>3</sub>, 150 MHz) δ 145.1, 133.6, 133.0, 126.2, 126.0, 120.9, 102.8; **HRMS** (ESI) *m/z* calculated C<sub>7</sub>H<sub>7</sub>N<sub>2</sub>S [M+H]<sup>+</sup> 151.0318, found 151.0324.

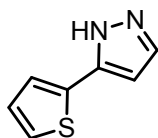

### (3v) 5(3)-(Thien-2-yl)-1H-pyrazole<sup>1</sup>

The mixture of 2 (181 mg, 0.6 mmol), CH<sub>3</sub>OLi (34.2 mg, 0.9 mmol), Mo(CO)<sub>6</sub> (4 mg, 0.015 mmol) and Ag<sub>2</sub>CO<sub>3</sub> (41.4 mg, 0.15 mmol) were added in a Schlenk tube. After evacuated and refilled with nitrogen 3 times, tetrahydrofuran (2.5 ml), 1v (32.4 mg, 0.3 mmol) and H<sub>2</sub>O (162 μl, 9 mmol) was added in one portion to the tube by syringe, follow stirred for 12 h at 60 °C. After completed, the reaction mixture was cooled to room temperature and quenched with water. The organic layer was extracted with 2M HCl (20 ml × 3), then use NaOH to adjust the aqueous layer's pH to 12-13, then the aqueous layer was extracted with CH<sub>2</sub>Cl<sub>2</sub> (100 ml × 3). The combined organic layers were dried over MgSO<sub>4</sub> and filtered, evacuated under vacuum. The residue was purified by column chromatography (PE : EA = 2 : 1) to give 3v 22.1 mg (49%).

White Solid; **<sup>1</sup>H-NMR** (600 MHz, CDCl<sub>3</sub>) δ 12.20 (s, 1H), 7.61 (d, *J* = 2.4 Hz, 1H), 7.33 (dd, *J* = 3.6, 1.2 Hz, 1H), 7.26 (dd, *J* = 5.4, 1.2 Hz, 1H), 7.06 (dd, *J* = 4.8, 3.6 Hz, 1H), 6.53 (d, *J* = 1.8 Hz, 1H); **<sup>13</sup>C-NMR** (150 MHz, CDCl<sub>3</sub>) δ 145.6, 135.8, 131.4, 127.6, 124.6, 124.1, 102.6; **HRMS** (ESI) *m/z* calculated C<sub>7</sub>H<sub>7</sub>N<sub>2</sub>S [M+H]<sup>+</sup> 151.0326, found 151.0324.

### III. Synthesis and spectra data of 5a-5k

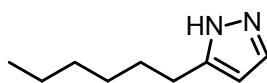

#### (5a) 5(3)-heptyl-1H-pyrazole

The mixture of 2 (136 mg, 0.45 mmol), CH<sub>3</sub>OLi (34.2 mg, 0.9 mmol), Mo(CO)<sub>6</sub> (4 mg, 0.015 mmol) and Ag<sub>2</sub>CO<sub>3</sub> (41.4 mg, 0.15 mmol) were added in a Schlenk tube. After evacuated and refilled with nitrogen 3 times, tetrahydrofuran (2.5 ml), 4a (33.1 mg, 0.3 mmol) and H<sub>2</sub>O (162 μl, 9 mmol) was added in one portion to the tube by syringe, follow stirred for 12 h at 60 °C. After completed, the reaction mixture was cooled to room temperature and quenched with water. The organic layer was extracted with 2M HCl (20 ml × 3), then use NaOH to adjust the aqueous layer's pH to 12-13, then the aqueous layer was extracted with CH<sub>2</sub>Cl<sub>2</sub> (100 ml × 3). The combined organic layers were dried over MgSO<sub>4</sub> and filtered, evacuated under vacuum. The residue was purified by column chromatography (PE : EA = 1 : 1) to give 5a 23.7 mg (52%).

Light Yellow Oil; **<sup>1</sup>H-NMR** (600 MHz, CDCl<sub>3</sub>) δ 11.23 (s, 1H), 7.49 (d, *J* = 1.8 Hz, 1H), 6.09 (d, *J* = 1.8 Hz, 1H), 2.70 – 2.66 (m, 2H), 1.69 – 1.63 (m, 2H), 1.39 – 1.33 (m, 2H), 1.33 – 1.28 (m, 4H), 0.88 (t, *J* = 7.2 Hz, 3H); **<sup>13</sup>C-NMR** (125 MHz, CDCl<sub>3</sub>) δ 148.0, 135.2, 103.3, 31.6, 29.4, 29.0, 26.7, 22.5, 14.0; **HRMS** (ESI) *m/z* calculated C<sub>9</sub>H<sub>17</sub>N<sub>2</sub> [M+H]<sup>+</sup> 153.1393, found 153.1386.

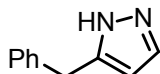

#### (5b) 5(3)-phenmethyl-1H-pyrazole

The mixture of 2 (136 mg, 0.45 mmol), CH<sub>3</sub>OLi (34.2 mg, 0.9 mmol), Mo(CO)<sub>6</sub> (4 mg, 0.015 mmol) and Ag<sub>2</sub>CO<sub>3</sub> (41.4 mg, 0.15 mmol) were added in a Schlenk tube. After evacuated and refilled with nitrogen 3 times, tetrahydrofuran (2.5 ml), 4b (34.8 mg, 0.3 mmol) and H<sub>2</sub>O (162 μl, 9 mmol) was added in one portion to the tube by syringe, follow stirred for 12 h at 60 °C. After completed, the reaction mixture was cooled to room temperature and quenched with water. The organic layer was extracted with 2M HCl (20 ml × 3), then use NaOH to adjust the aqueous layer's pH to 12-13, then the aqueous layer was extracted with CH<sub>2</sub>Cl<sub>2</sub> (100 ml × 3). The combined organic layers were dried over MgSO<sub>4</sub> and filtered, evacuated under vacuum. The residue was purified by column chromatography (PE : EA = 1 : 1) to give 5b 24.2 mg (51%).

Light Yellow Oil; **<sup>1</sup>H-NMR** (600 MHz, CDCl<sub>3</sub>) δ 11.15 (s, 1H), 7.41 (d, *J* = 1.8 Hz, 1H), 7.30 – 7.26 (m, 2H), 7.21 (d, *J* = 7.2 Hz, 3H), 6.06 (d, *J* = 2.4 Hz, 1H), 4.01 (s, 2H); **<sup>13</sup>C-NMR** (150 MHz, CDCl<sub>3</sub>) δ 147.8, 139.1, 134.1, 128.7, 128.5, 126.4, 104.3, 33.5.; **HRMS** (ESI) *m/z* calculated C<sub>10</sub>H<sub>11</sub>N<sub>2</sub> [M+H]<sup>+</sup> 159.0911, found 159.0917.

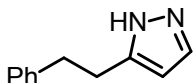

#### (5c) 5(3)-phenethyl-1H-pyrazole

The mixture of 2 (136 mg, 0.45 mmol), CH<sub>3</sub>OLi (34.2 mg, 0.9 mmol), Mo(CO)<sub>6</sub> (4 mg, 0.015 mmol) and Ag<sub>2</sub>CO<sub>3</sub> (41.4 mg, 0.15 mmol) were added in a Schlenk tube. After evacuated and refilled with nitrogen 3 times, tetrahydrofuran (2.5 ml), 4c (39.1 mg, 0.3 mmol) and H<sub>2</sub>O (162 μl, 9 mmol) was added in one portion to the tube by syringe, follow stirred for 12 h at 60 °C. After completed, the reaction mixture was cooled to room temperature and quenched with water. The

organic layer was extracted with 2M HCl (20 ml × 3), then use NaOH to adjust the aqueous layer's pH to 12-13, then the aqueous layer was extracted with CH<sub>2</sub>Cl<sub>2</sub> (100 ml × 3). The combined organic layers were dried over MgSO<sub>4</sub> and filtered, evacuated under vacuum. The residue was purified by column chromatography (PE : EA = 1 : 1) to give 5c 29.4 mg (57%).

Light Yellow Oil; **<sup>1</sup>H-NMR** (600 MHz, CDCl<sub>3</sub>) δ 9.41 (s, 1H), 7.47 (d, *J* = 1.8 Hz, 1H), 7.27 (t, *J* = 7.2 Hz, 2H), 7.21 – 7.15 (m, 3H), 6.07 (d, *J* = 1.8 Hz, 1H), 3.01 – 2.95 (m, 4H); **<sup>13</sup>C-NMR** (150 MHz, CDCl<sub>3</sub>) δ 147.6, 141.2, 134.2, 128.4, 128.3, 126.1, 103.6, 35.6, 28.7; **HRMS** (ESI) *m/z* calculated C<sub>11</sub>H<sub>13</sub>N<sub>2</sub> [M+H]<sup>+</sup> 173.1078, found 173.1073.

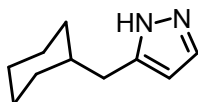

#### (5d) 5(3)-cyclohexylmethyl-1H-pyrazole

The mixture of 2 (136 mg, 0.45 mmol), CH<sub>3</sub>OLi (34.2 mg, 0.9 mmol), Mo(CO)<sub>6</sub> (4 mg, 0.015 mmol) and Ag<sub>2</sub>CO<sub>3</sub> (41.4 mg, 0.15 mmol) were added in a Schlenk tube. After evacuated and refilled with nitrogen 3 times, tetrahydrofuran (2.5 ml), 4d (36.7 mg, 0.3 mmol) and H<sub>2</sub>O (162 μl, 9 mmol) was added in one portion to the tube by syringe, follow stirred for 12 h at 60 °C. After completed, the reaction mixture was cooled to room temperature and quenched with water. The organic layer was extracted with 2M HCl (20 ml × 3), then use NaOH to adjust the aqueous layer's pH to 12-13, then the aqueous layer was extracted with CH<sub>2</sub>Cl<sub>2</sub> (100 ml × 3). The combined organic layers were dried over MgSO<sub>4</sub> and filtered, evacuated under vacuum. The residue was purified by column chromatography (PE : EA = 1 : 1) to give 5d 22.7 mg (46%).

Light Yellow Oil; **<sup>1</sup>H-NMR** (600 MHz, CDCl<sub>3</sub>) δ 11.35 (s, 1H), 7.50 (d, *J* = 1.8 Hz, 1H), 6.07 (d, *J* = 1.8 Hz, 1H), 2.56 (d, *J* = 6.6 Hz, 2H), 1.70 (t, *J* = 13.2 Hz, 4H), 1.64 (d, *J* = 12.6 Hz, 1H), 1.62 – 1.55 (m, 1H), 1.25 – 1.12 (m, 3H), 1.00 – 0.92 (m, 2H); **<sup>13</sup>C-NMR** (150 MHz, CDCl<sub>3</sub>) δ 146.4, 135.5, 104.1, 38.4, 34.6, 33.1, 26.4, 26.1; **HRMS** (ESI) *m/z* calculated C<sub>10</sub>H<sub>17</sub>N<sub>2</sub> [M+H]<sup>+</sup> 165.1066, found 165.1063.

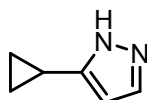

#### (5e) 5(3)-cyclopropyl-1H-pyrazole

The mixture of 2 (136 mg, 0.45 mmol), CH<sub>3</sub>OLi (34.2 mg, 0.9 mmol), Mo(CO)<sub>6</sub> (4 mg, 0.015 mmol) and Ag<sub>2</sub>CO<sub>3</sub> (41.4 mg, 0.15 mmol) were added in a Schlenk tube. After evacuated and refilled with nitrogen 3 times, tetrahydrofuran (2.5 ml), 4e (20.7 mg, 0.3 mmol) and H<sub>2</sub>O (162 μl, 9 mmol) was added in one portion to the tube by syringe, follow stirred for 12 h at 60 °C. After completed, the reaction mixture was cooled to room temperature and quenched with water. The organic layer was extracted with 2M HCl (20 ml × 3), then use NaOH to adjust the aqueous layer's pH to 12-13, then the aqueous layer was extracted with CH<sub>2</sub>Cl<sub>2</sub> (100 ml × 3). The combined organic layers were dried over MgSO<sub>4</sub> and filtered, evacuated under vacuum. The residue was purified by column chromatography (PE : EA = 1 : 1) to give 5e 15.9 mg (49%).

Light Yellow Oil; **<sup>1</sup>H-NMR** (600 MHz, CDCl<sub>3</sub>) δ 10.40 (s, 1H), 7.44 (d, *J* = 1.8 Hz, 1H), 5.96 (d, *J* = 2.4 Hz, 1H), 1.95 – 1.90 (m, 1H), 0.96 – 0.91 (m, 2H), 0.76 – 0.71 (m, 2H); **<sup>13</sup>C-NMR** (150 MHz, CDCl<sub>3</sub>) δ 152.0, 135.9, 100.9, 8.2, 7.7; **HRMS** (ESI) *m/z* calculated C<sub>6</sub>H<sub>9</sub>N<sub>2</sub> [M+H]<sup>+</sup> 109.0911, found 109.0917.

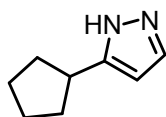

**(5f) 5(3)-cyclopentyl-1H-pyrazole**

The mixture of **2** (136 mg, 0.45 mmol), CH<sub>3</sub>OLi (34.2 mg, 0.9 mmol), Mo(CO)<sub>6</sub> (4 mg, 0.015 mmol) and Ag<sub>2</sub>CO<sub>3</sub> (41.4 mg, 0.15 mmol) were added in a Schlenk tube. After evacuated and refilled with nitrogen 3 times, tetrahydrofuran (2.5 ml), **4f** (28.2 mg, 0.3 mmol) and H<sub>2</sub>O (162 μl, 9 mmol) was added in one portion to the tube by syringe, follow stirred for 12 h at 60 °C. After completed, the reaction mixture was cooled to room temperature and quenched with water. The organic layer was extracted with 2M HCl (20 ml × 3), then use NaOH to adjust the aqueous layer's pH to 12-13, then the aqueous layer was extracted with CH<sub>2</sub>Cl<sub>2</sub> (100 ml × 3). The combined organic layers were dried over MgSO<sub>4</sub> and filtered, evacuated under vacuum. The residue was purified by column chromatography (PE : EA = 1 : 1) to give **5f** 23.7 mg (58%).

Light Yellow Oil; **<sup>1</sup>H-NMR** (600 MHz, CDCl<sub>3</sub>) δ 11.02 (s, 1H), 7.41 (d, *J* = 2.4 Hz, 1H), 6.02 (d, *J* = 1.8 Hz, 1H), 3.16 – 3.09 (m, 1H), 2.10 – 2.07 (m, 2H), 1.75 – 1.65 (m, 2H), 1.64 – 1.54 (m, 4H); **<sup>13</sup>C-NMR** (150 MHz, CDCl<sub>3</sub>) δ 152.1, 135.7, 101.9, 37.7, 33.2, 25.2; **HRMS** (ESI) *m/z* calculated C<sub>8</sub>H<sub>13</sub>N<sub>2</sub> [M+H]<sup>+</sup> 137.1068, found 137.1073.

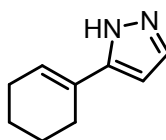

**(5g) 5(3)-cyclohexenyl-1H-pyrazole**

The mixture of **2** (136 mg, 0.45 mmol), CH<sub>3</sub>OLi (34.2 mg, 0.9 mmol), Mo(CO)<sub>6</sub> (4 mg, 0.015 mmol) and Ag<sub>2</sub>CO<sub>3</sub> (41.4 mg, 0.15 mmol) were added in a Schlenk tube. After evacuated and refilled with nitrogen 3 times, tetrahydrofuran (2.5 ml), **4g** (31.9 mg, 0.3 mmol) and H<sub>2</sub>O (162 μl, 9 mmol) was added in one portion to the tube by syringe, follow stirred for 12 h at 60 °C. After completed, the reaction mixture was cooled to room temperature and quenched with water. The organic layer was extracted with 2M HCl (20 ml × 3), then use NaOH to adjust the aqueous layer's pH to 12-13, then the aqueous layer was extracted with CH<sub>2</sub>Cl<sub>2</sub> (100 ml × 3). The combined organic layers were dried over MgSO<sub>4</sub> and filtered, evacuated under vacuum. The residue was purified by column chromatography (PE : EA = 1 : 1) to give **5g** 22.6 mg (51%).

Light Yellow Oil; **<sup>1</sup>H-NMR** (600 MHz, CDCl<sub>3</sub>) δ 10.04 (s, 1H), 7.50 (d, *J* = 2.4 Hz, 1H), 6.28 (d, *J* = 1.8 Hz, 1H), 6.28 – 6.25 (m, 1H), 2.43 – 2.40 (m, 2H), 2.21 – 2.17 (m, 2H), 1.78 – 1.74 (m, 2H), 1.69 – 1.64 (m, 2H); **<sup>13</sup>C-NMR** (150 MHz, CDCl<sub>3</sub>) δ 148.4, 135.2, 128.1, 124.9, 101.0, 26.1, 25.3, 22.5, 22.1; **HRMS** (ESI) *m/z* calculated C<sub>9</sub>H<sub>13</sub>N<sub>2</sub> [M+H]<sup>+</sup> 149.1080, found 149.1073.

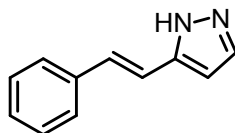

**(5h) 5(3)-cinnamyl-1H-pyrazole**

The mixture of **2** (136 mg, 0.45 mmol), CH<sub>3</sub>OLi (34.2 mg, 0.9 mmol), Mo(CO)<sub>6</sub> (4 mg, 0.015 mmol) and Ag<sub>2</sub>CO<sub>3</sub> (41.4 mg, 0.15 mmol) were added in a Schlenk tube. After evacuated and refilled with nitrogen 3 times, tetrahydrofuran (2.5 ml), **4h** (38.7 mg, 0.3 mmol) and H<sub>2</sub>O (162 μl, 9 mmol) was added in one portion to the tube by syringe, follow stirred for 12 h at 60 °C. After

completed, the reaction mixture was cooled to room temperature and quenched with water. The organic layer was extracted with 4M HCl (20 ml × 3), then use NaOH to adjust the aqueous layer's pH to 12-13, then the aqueous layer was extracted with CH<sub>2</sub>Cl<sub>2</sub> (100 ml × 3). The combined organic layers were dried over MgSO<sub>4</sub> and filtered, evacuated under vacuum. The residue was purified by column chromatography (PE : EA = 2 : 1) to give 5h 16.9 mg (33%). White Solid; mp: 90-92 °C; **<sup>1</sup>H-NMR** (600 MHz, CDCl<sub>3</sub>) δ 9.69 (s, 1H), 7.59 (s, 1H), 7.49 – 7.45 (m, 2H), 7.32 (t, *J* = 7.2 Hz, 2H), 7.25 (t, *J* = 7.2 Hz, 1H), 7.12 (s, 2H), 6.51 (d, *J* = 2.4 Hz, 1H); **<sup>13</sup>C-NMR** (150 MHz, CDCl<sub>3</sub>) δ 147.1, 136.7, 133.7, 130.6, 128.7, 127.9, 126.5, 118.4, 102.8; **HRMS** (ESI) *m/z* calculated C<sub>11</sub>H<sub>11</sub>N<sub>2</sub> [M+H]<sup>+</sup> 171.0914, found 171.0917.

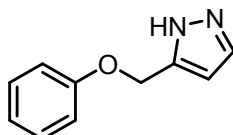

**(5i) 5(3)-phenoxybut-1H-pyrazole**

The mixture of 2 (181 mg, 0.45 mmol), CH<sub>3</sub>OLi (34.2 mg, 0.9 mmol), Mo(CO)<sub>6</sub> (4 mg, 0.015 mmol) and Ag<sub>2</sub>CO<sub>3</sub> (41.4 mg, 0.15 mmol) were added in a Schlenk tube. After evacuated and refilled with nitrogen 3 times, tetrahydrofuran (2.5 ml), 4k (63.3 mg, 0.3 mmol) and H<sub>2</sub>O (162 μl, 9 mmol) was added in one portion to the tube by syringe, follow stirred for 12 h at 60 °C. After completed, the reaction mixture was cooled to room temperature and quenched with water. The organic layer was extracted with 2M HCl (20 ml × 3), then use NaOH to adjust the aqueous layer's pH to 12-13, then the aqueous layer was extracted with CH<sub>2</sub>Cl<sub>2</sub> (100 ml × 3). The combined organic layers were dried over MgSO<sub>4</sub> and filtered, evacuated under vacuum. The residue was purified by column chromatography (PE : EA = 1 : 1) to give 5k 26.1 mg (50%). Light Yellow Oil; **<sup>1</sup>H-NMR** (600 MHz, CDCl<sub>3</sub>) δ 11.27 (s, 1H), 7.53 (d, *J* = 2.4 Hz, 1H), 7.27 (t, *J* = 7.8 Hz, 2H), 7.00 – 6.90 (m, 3H), 6.38 (d, *J* = 1.8 Hz, 1H), 5.13 (s, 2H); **<sup>13</sup>C-NMR** (150 MHz, CDCl<sub>3</sub>) δ 158.5, 146.3, 131.7, 129.5, 121.1, 114.8, 104.6, 63.4; **HRMS** (ESI) *m/z* calculated C<sub>10</sub>H<sub>11</sub>N<sub>2</sub>O [M+H]<sup>+</sup> 175.0865, found 175.0866.

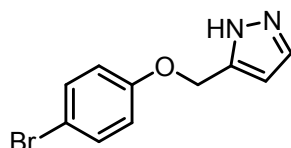

**(5j) 5(3)-(4-bromophenoxy)but-1H-pyrazole**

The mixture of 2 (181 mg, 0.45 mmol), CH<sub>3</sub>OLi (34.2 mg, 0.9 mmol), Mo(CO)<sub>6</sub> (4 mg, 0.015 mmol) and Ag<sub>2</sub>CO<sub>3</sub> (41.4 mg, 0.15 mmol) were added in a Schlenk tube. After evacuated and refilled with nitrogen 3 times, tetrahydrofuran (2.5 ml), 4j (63.3 mg, 0.3 mmol) and H<sub>2</sub>O (162 μl, 9 mmol) was added in one portion to the tube by syringe, follow stirred for 12 h at 60 °C. After completed, the reaction mixture was cooled to room temperature and quenched with water. The organic layer was extracted with 4M HCl (20 ml × 3), then use NaOH to adjust the aqueous layer's pH to 12-13, then the aqueous layer was extracted with CH<sub>2</sub>Cl<sub>2</sub> (100 ml × 3). The combined organic layers were dried over MgSO<sub>4</sub> and filtered, evacuated under vacuum. The residue was purified by column chromatography (PE : EA = 1 : 1) to give 5j 32.6 mg (43%). Yellow Solid; mp: 71-73 °C; **<sup>1</sup>H-NMR** (600 MHz, CDCl<sub>3</sub>) δ 10.77 (s, 1H), 7.55 (d, *J* = 2.4 Hz, 1H), 7.35 (d, *J* = 9.0 Hz, 2H), 6.85 (d, *J* = 9.0 Hz, 2H), 6.39 (d, *J* = 2.4 Hz, 1H), 5.10 (s, 2H); **<sup>13</sup>C-**



**NMR** (150 MHz, CDCl<sub>3</sub>)  $\delta$  157.5, 146.3, 132.3, 131.4, 116.6, 113.3, 104.8, 63.7; **HRMS** (ESI)  $m/z$  calculated C<sub>10</sub>H<sub>10</sub>BrN<sub>2</sub>O [M+H]<sup>+</sup> 252.9971, found 252.9971.

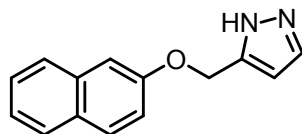

**(5k) 5(3)-(naphthalen-2-yloxy)but-1H-pyrazole**

The mixture of 4i (54.6 mg, 0.3 mmol), 2 (181 mg, 0.45 mmol), CH<sub>3</sub>OLi (34.2 mg, 0.9 mmol), Mo(CO)<sub>6</sub> (4 mg, 0.015 mmol) and Ag<sub>2</sub>CO<sub>3</sub> (41.4 mg, 0.15 mmol) were added in a Schlenk tube. After evacuated and refilled with nitrogen 3 times, tetrahydrofuran (2.5 ml) and H<sub>2</sub>O (162  $\mu$ l, 9 mmol) was added in one portion to the tube by syringe, follow stirred for 12 h at 60 °C. After completed, the reaction mixture was cooled to room temperature and quenched with water. Then the aqueous layer was extracted with CH<sub>2</sub>Cl<sub>2</sub> (100 ml  $\times$  3). The combined organic layers were dried over MgSO<sub>4</sub> and filtered, evacuated under vacuum. The residue was purified by column chromatography (PE : EA = 5 : 1) to give 5i 46.4 mg (69%).

White Solid; mp: 80-82 °C; **<sup>1</sup>H-NMR** (600 MHz, CDCl<sub>3</sub>)  $\delta$  10.29 (s, 1H), 7.73 (d,  $J$  = 8.4 Hz, 1H), 7.70 (d,  $J$  = 9.0 Hz, 1H), 7.66 (d,  $J$  = 8.4 Hz, 1H), 7.53 (s, 1H), 7.40 (t,  $J$  = 7.2 Hz, 1H), 7.32 (t,  $J$  = 7.2 Hz, 1H), 7.22 - 7.16 (m, 2H), 6.41 (s, 1H), 5.23 (s, 2H); **<sup>13</sup>C-NMR** (150 MHz, CDCl<sub>3</sub>)  $\delta$  156.4, 146.2, 134.4, 131.7, 129.5, 129.1, 127.6, 126.8, 126.3, 123.8, 118.8, 107.1, 104.8, 63.4; **HRMS** (ESI)  $m/z$  calculated C<sub>14</sub>H<sub>13</sub>N<sub>2</sub>O [M+H]<sup>+</sup> 225.1027, found 225.1022.

**([D]-3a) 5(3)-4-Tolyl-1H-pyrazole**

White Solid (36.1 mg, 75%); **<sup>1</sup>H NMR** (600 MHz, CDCl<sub>3</sub>)  $\delta$  7.62 (d,  $J$  = 8.0 Hz, 2H), 7.58 (s, 0.15H), 7.19 (d,  $J$  = 8.0 Hz, 2H), 6.55 (s, 0.16H), 2.37 (s, 3H); **HRMS** (ESI)  $m/z$  calculated C<sub>10</sub>H<sub>9</sub>D<sub>2</sub>N<sub>2</sub> [M+H]<sup>+</sup> 161.1221, found 161.1219.

Refers:

- [1] K. Longhi, D. N. Moreira, M. R. B. Marzari, V. M. Floss, H. G. Bonacorso, N. Zanatta and M. A. P. Martins *Tetrahedron Letters* 2010, **51**, 3193-3196.
- [2] G. A. Molander and L. Jeang rard *J. Org. Chem.* 2009, **74**, 973–980.
- [3] J. Catalan, F. Fabero, R. M. Claramunt, M. D. Santa Maria, M. C. Foces-Foces, F. Hernandez Cano, M. Martinez-Ripoll, J. Elguero and R. Sastre *J. Am. Chem. Soc.* 1992, **114**, 5039–5048.
- [4] K. Muller, Y. Sun, A. Heimermann, F. Menges, G. Niedner-Schatteburg, C. van W llen and W. R. Thiel *Chem. Eur. J.* 2013, **19**, 7825 –7834.
- [5] E. V. Vashkevich, V. I. Potkin and N. G. Kozlov *Russ. J. Org. Chem.* 2004, **10**, 1503 –1507.

## IV. $^1\text{H}$ - and $^{13}\text{C}$ -NMR spectra copies

**3a**  $^1\text{H}$ -NMR (600 MHz,  $\text{CDCl}_3$ ) &  $^{13}\text{C}$ -NMR ( $\text{CDCl}_3$ , 150 MHz)

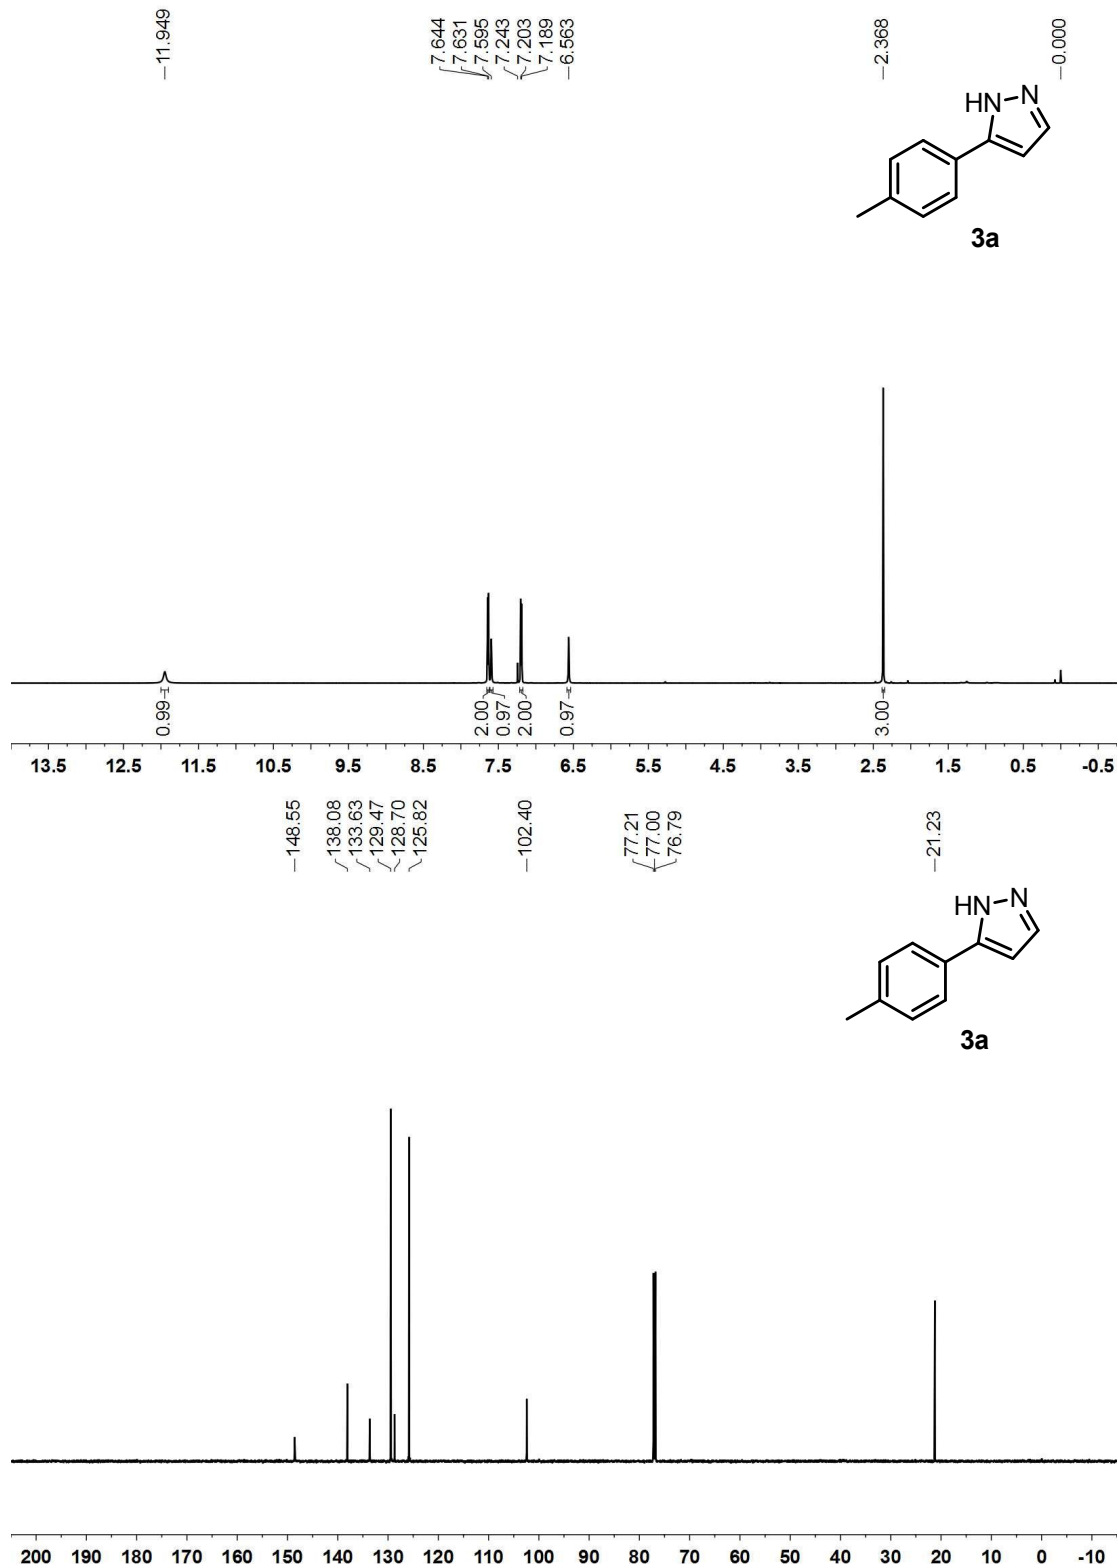

**3b**  $^1\text{H-NMR}$  (600 MHz,  $\text{CDCl}_3$ ) &  $^{13}\text{C-NMR}$  ( $\text{CDCl}_3$ , 150 MHz)

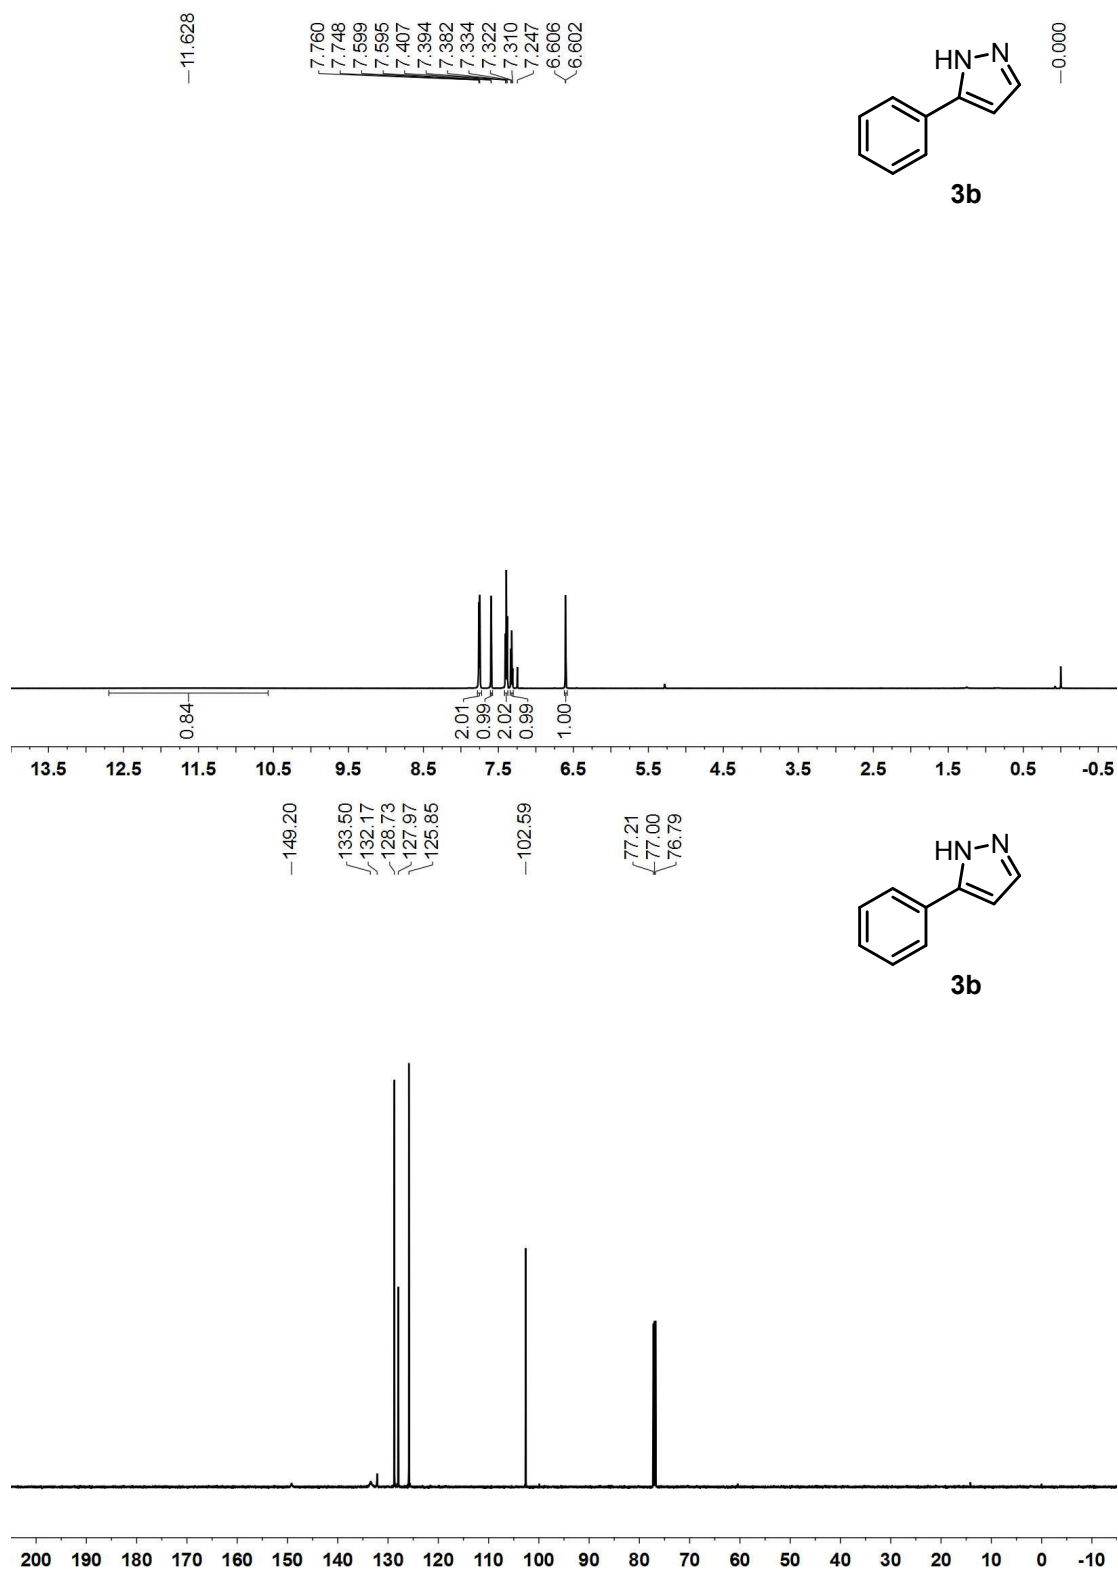

**3c** <sup>1</sup>H-NMR (600 MHz, CDCl<sub>3</sub>) & <sup>13</sup>C-NMR (CDCl<sub>3</sub>, 150 MHz)

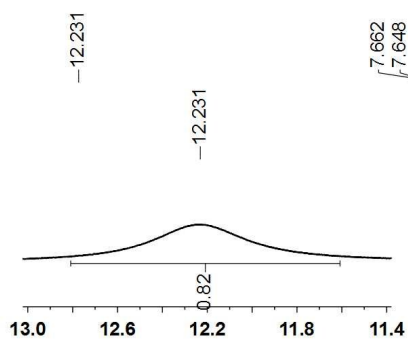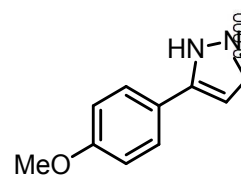

**3c**

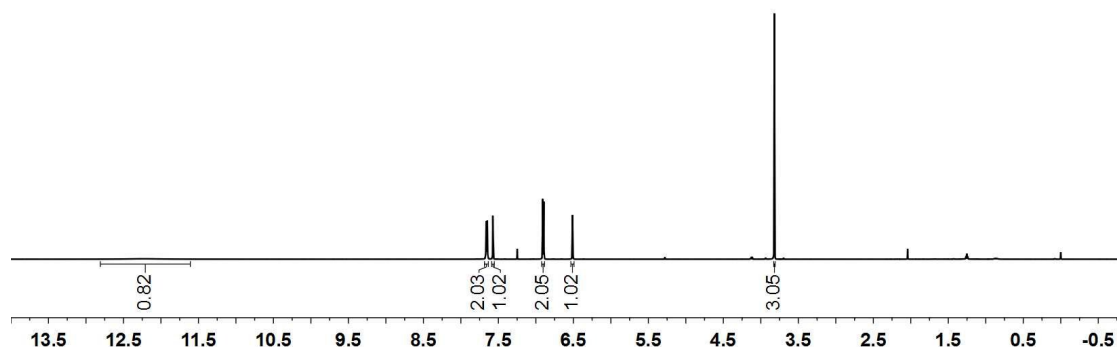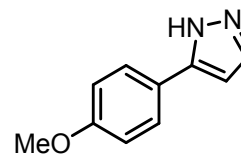

**3c**

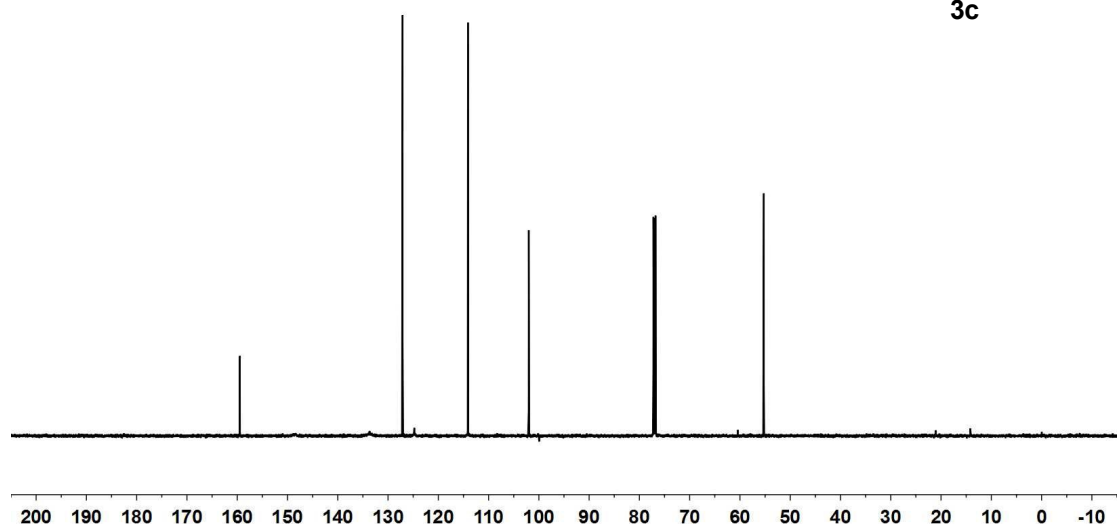

**3d** <sup>1</sup>H-NMR (600 MHz, CDCl<sub>3</sub>) & <sup>13</sup>C-NMR (CDCl<sub>3</sub>, 150 MHz)

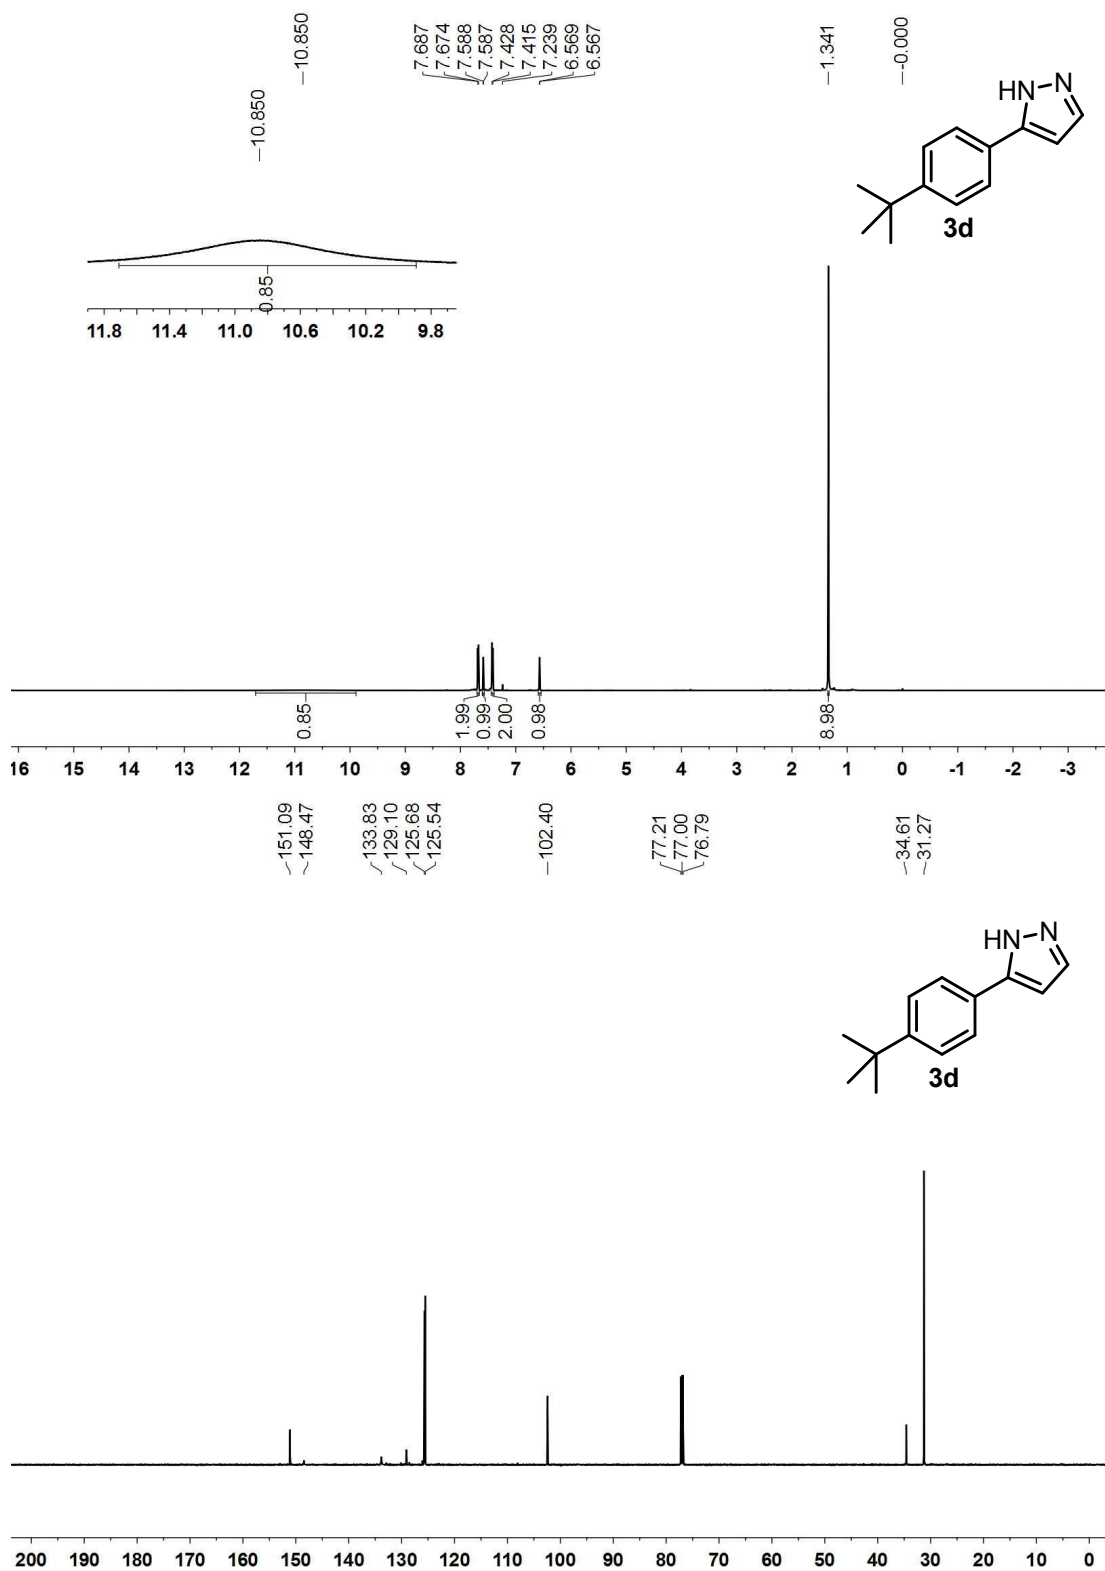

**3e** <sup>1</sup>H-NMR (600 MHz, CDCl<sub>3</sub>) & <sup>13</sup>C-NMR (CDCl<sub>3</sub>, 150 MHz)

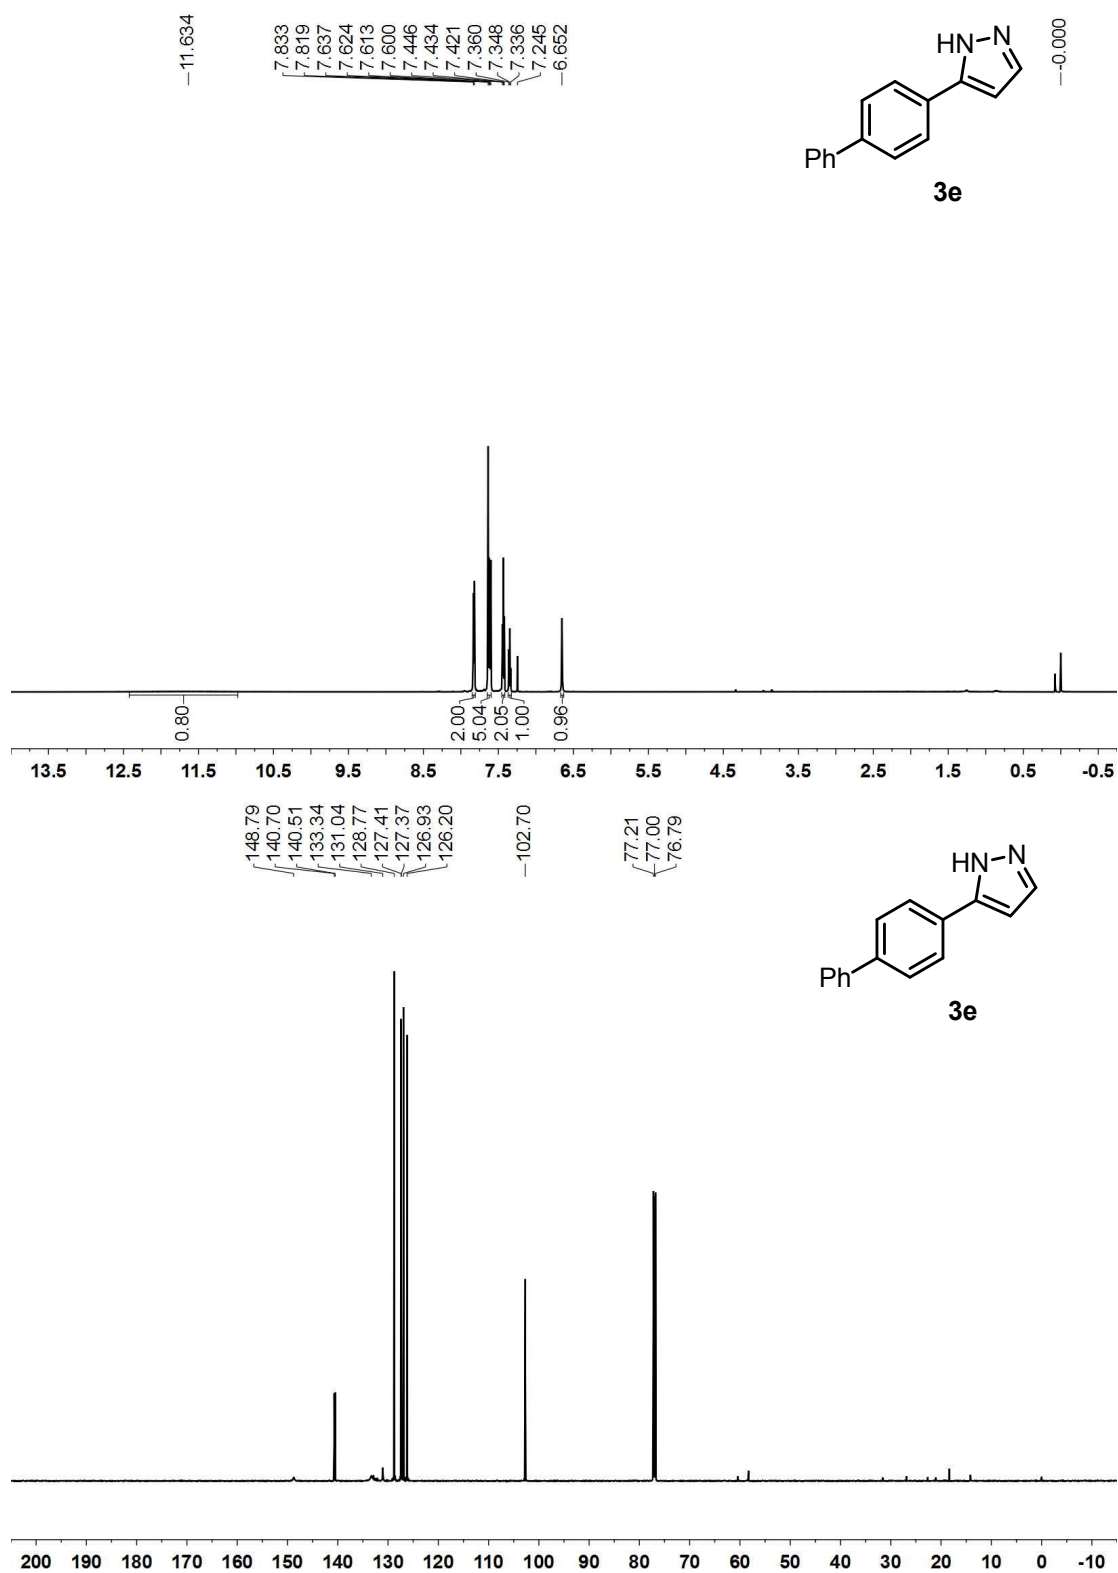

**3f** <sup>1</sup>H-NMR (600 MHz, CDCl<sub>3</sub>) & <sup>13</sup>C-NMR (CDCl<sub>3</sub>, 125 MHz)

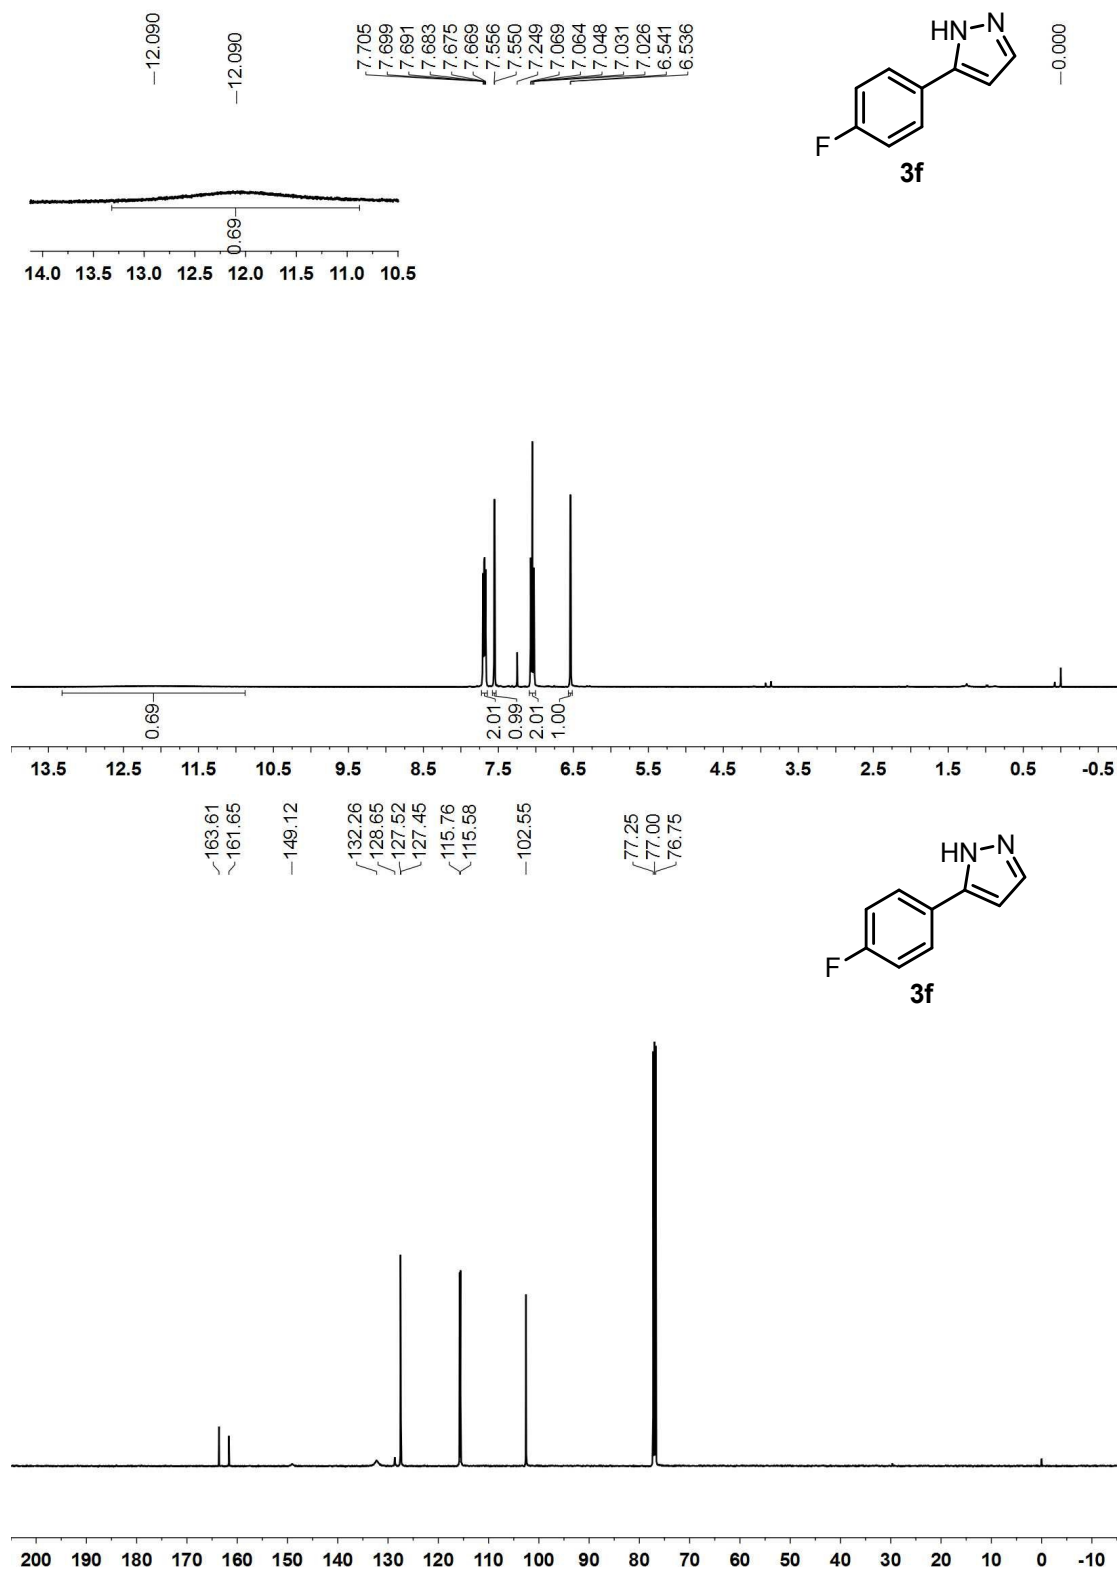



**3g**  $^1\text{H-NMR}$  (600 MHz,  $\text{CDCl}_3$ ) &  $^{13}\text{C-NMR}$  ( $\text{CDCl}_3$ , 150 MHz)

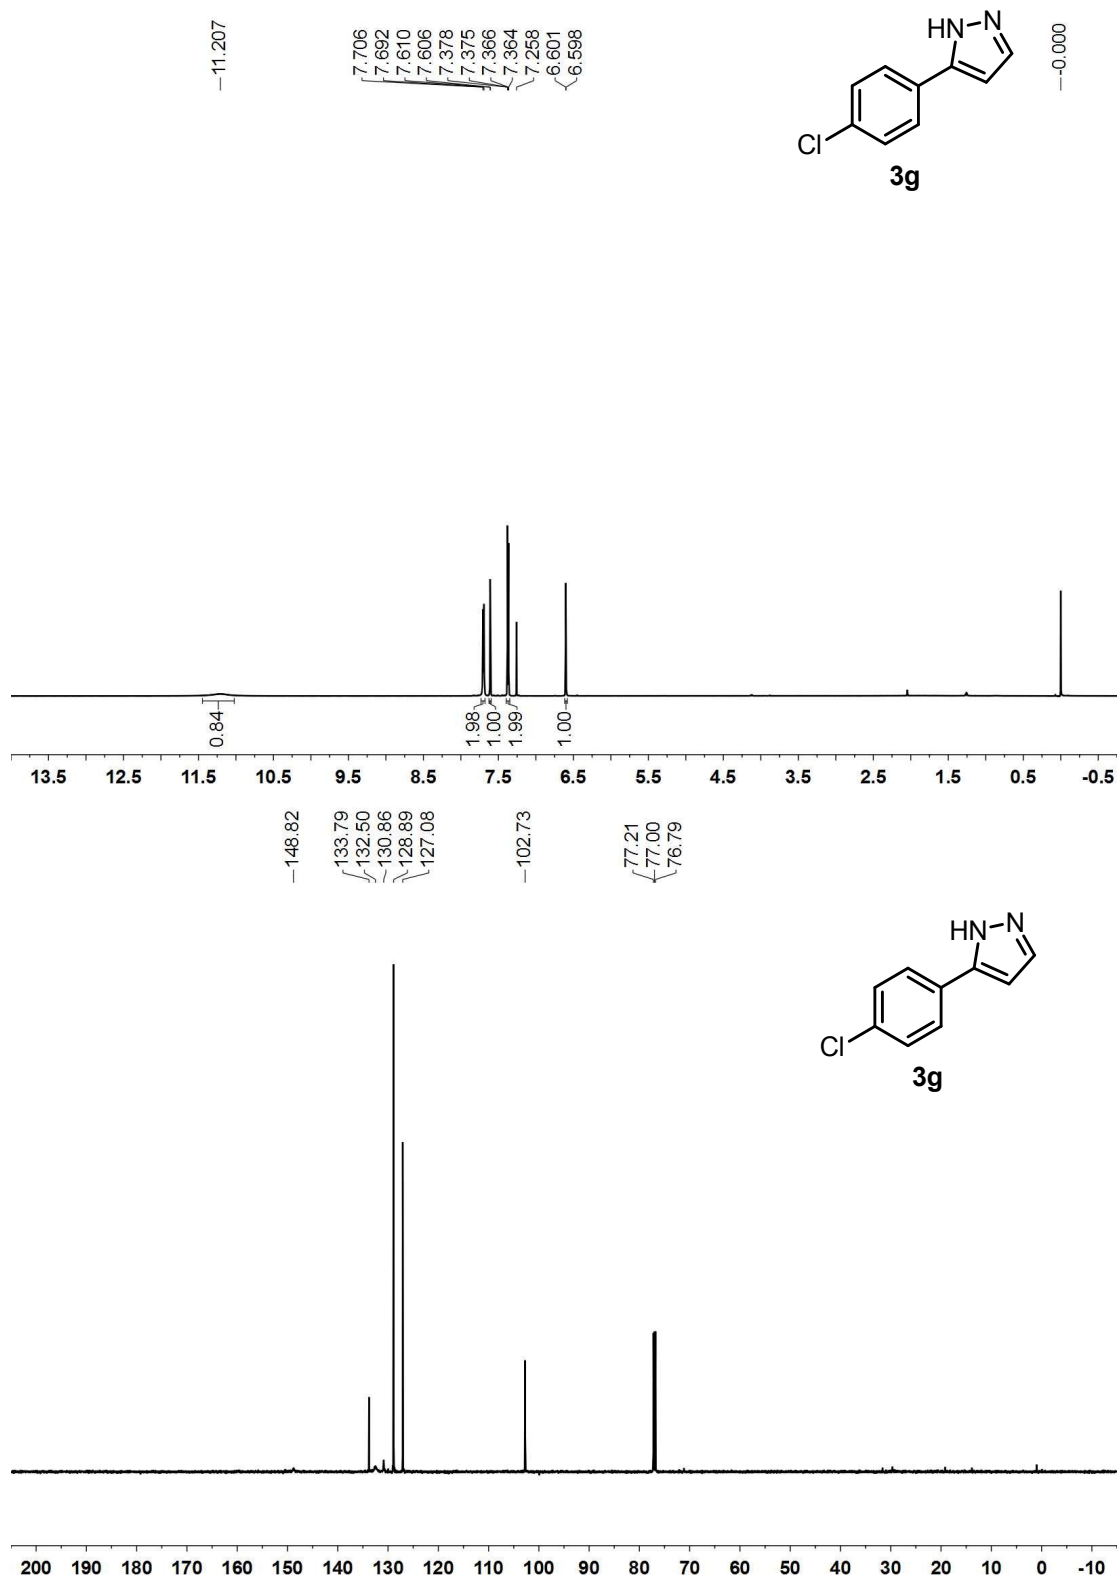

**3h** <sup>1</sup>H-NMR (600 MHz, CDCl<sub>3</sub>) & <sup>13</sup>C-NMR (CDCl<sub>3</sub>, 150 MHz)

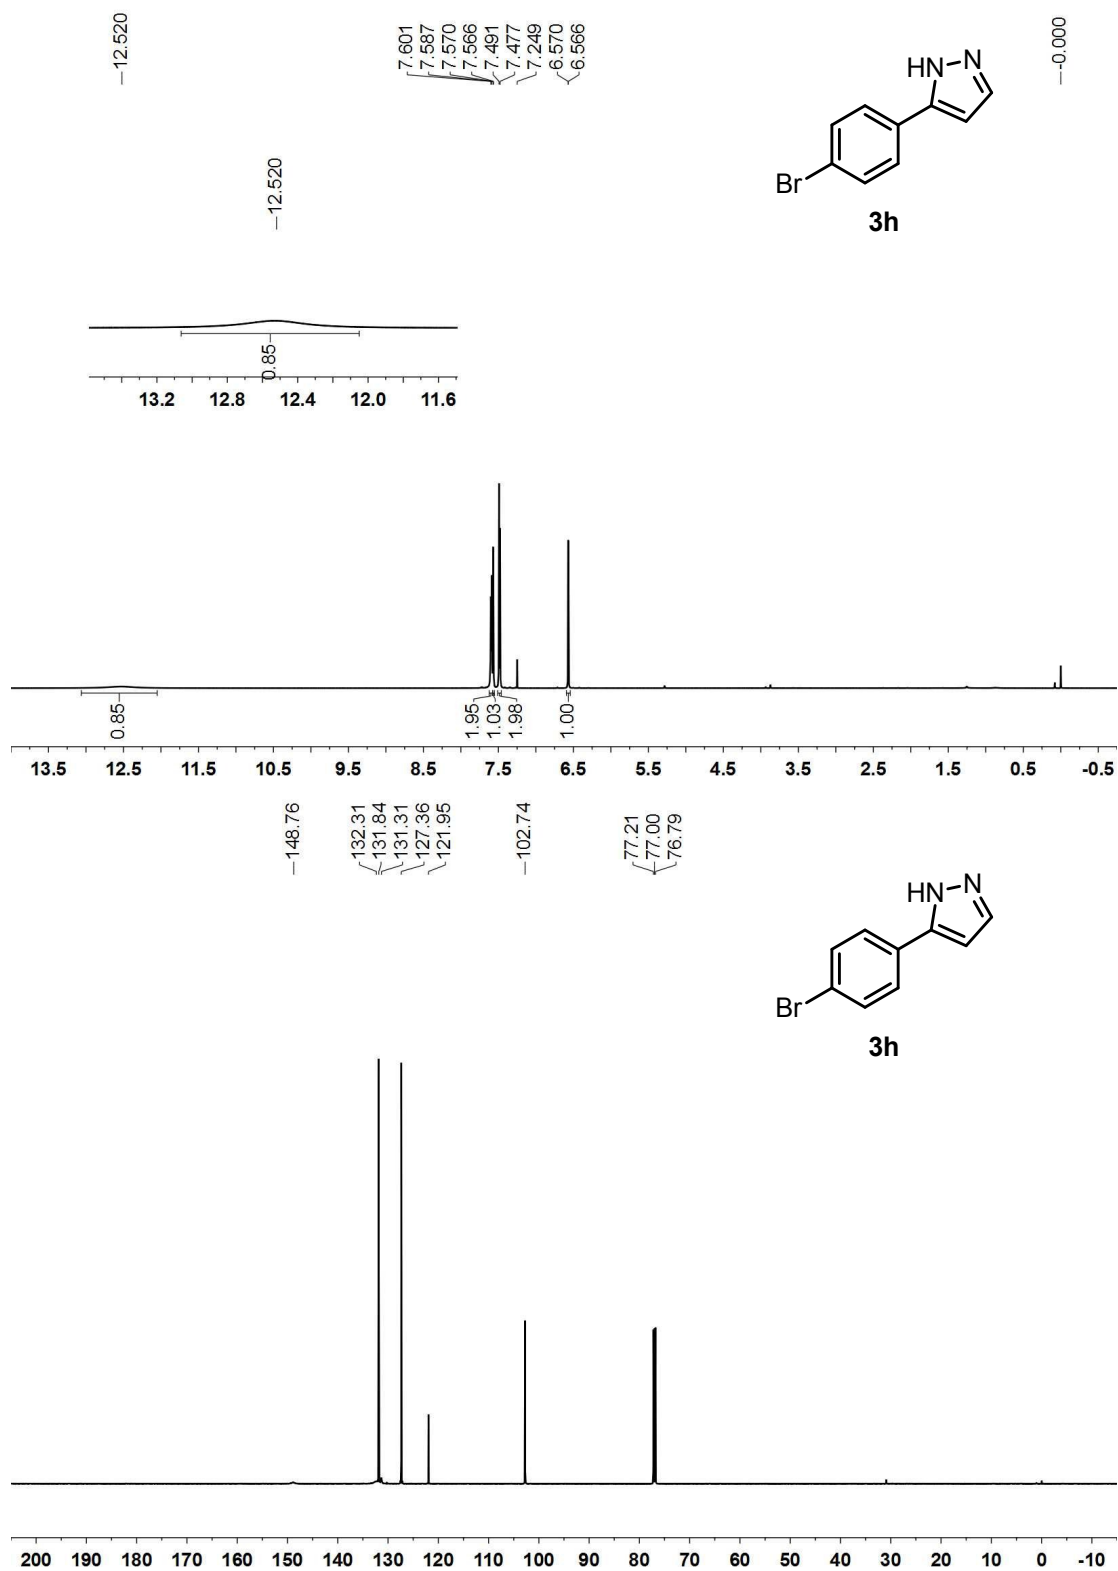

**3i**  $^1\text{H-NMR}$  (600 MHz,  $\text{CDCl}_3$ ) &  $^{13}\text{C-NMR}$  ( $\text{CDCl}_3$ , 150 MHz)

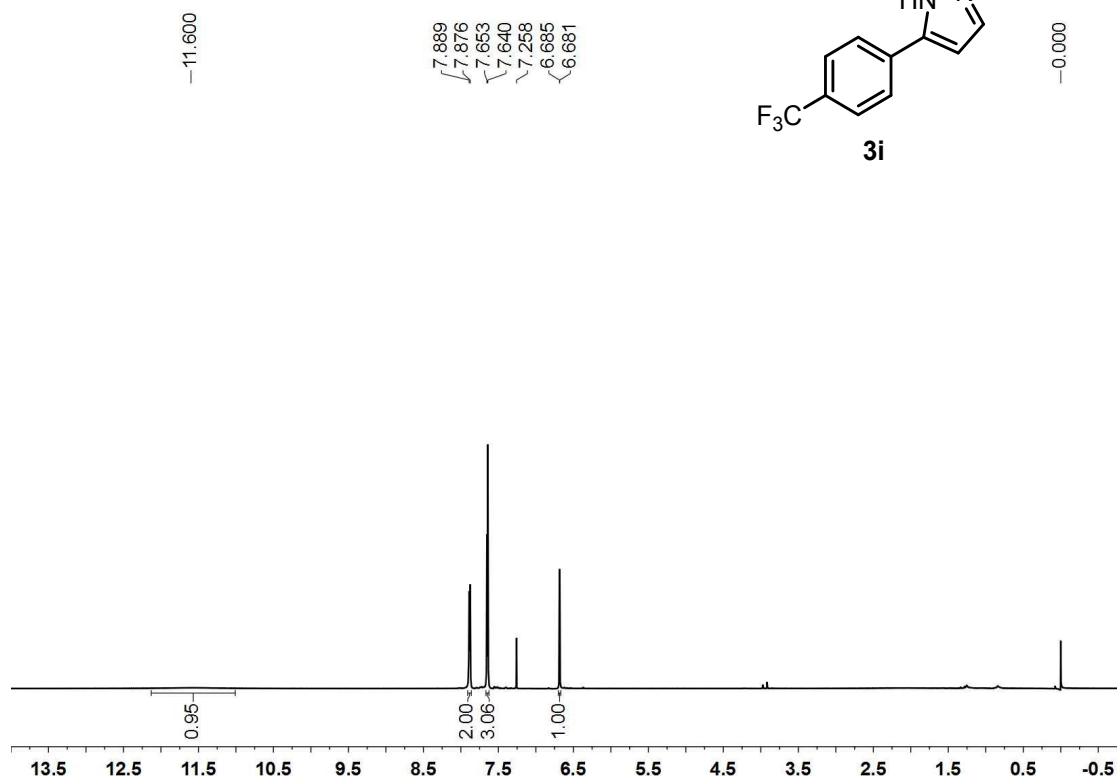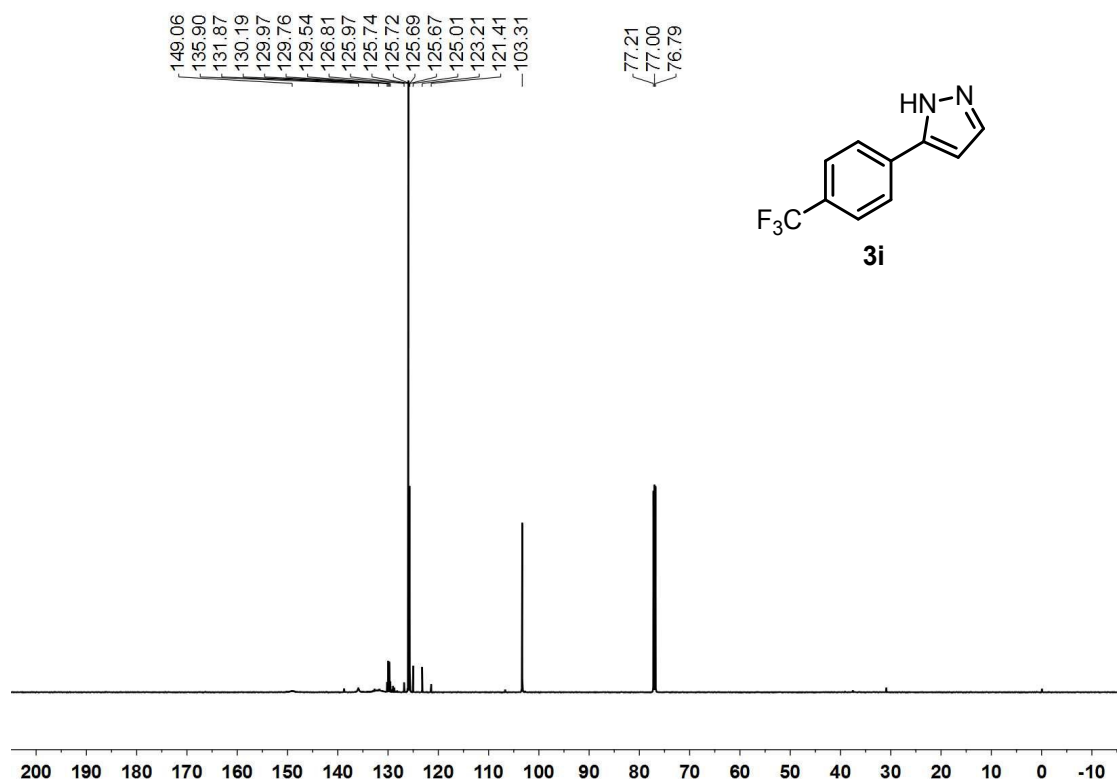

**3j**  $^1\text{H-NMR}$  (600 MHz,  $\text{CDCl}_3$ ) &  $^{13}\text{C-NMR}$  ( $\text{CDCl}_3$ , 150 MHz)

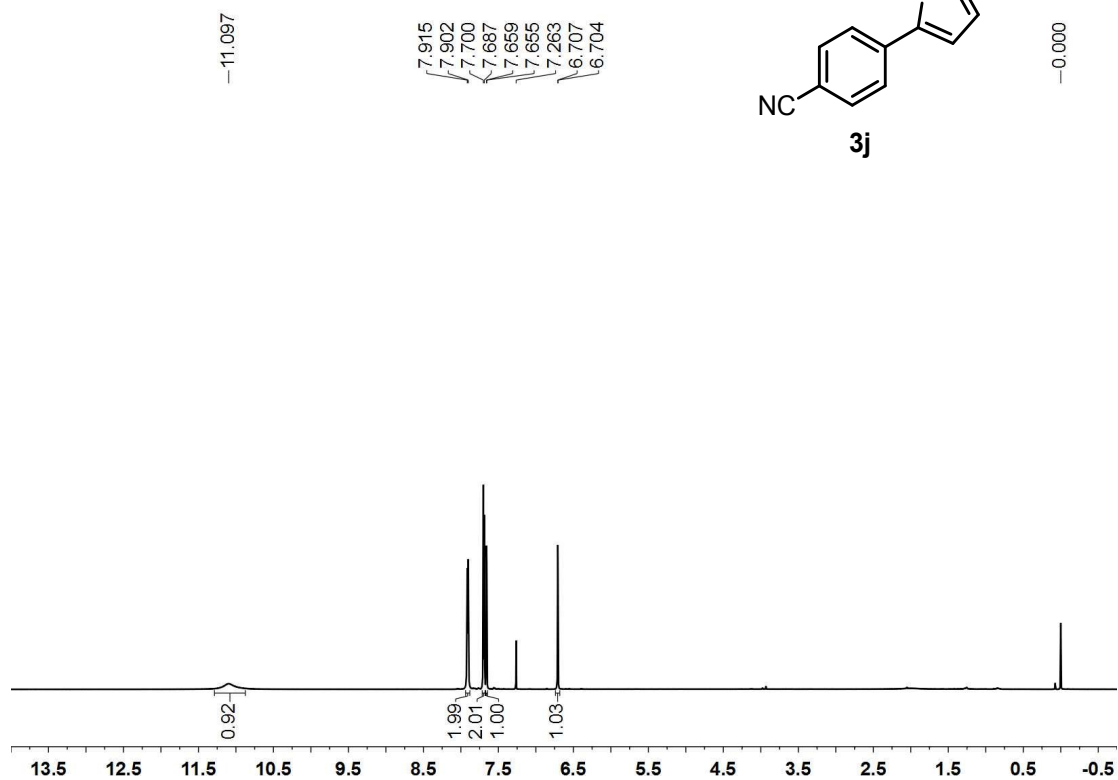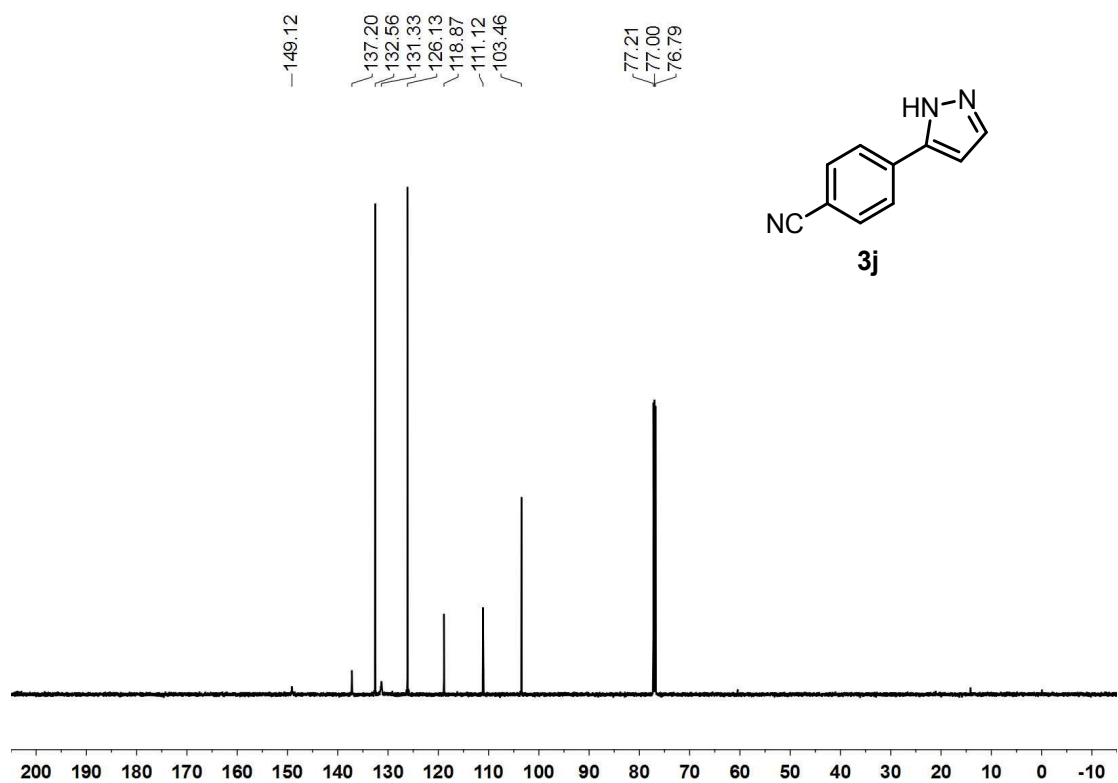

**3k** <sup>1</sup>H-NMR (600 MHz, CDCl<sub>3</sub>) & <sup>13</sup>C-NMR (CDCl<sub>3</sub>, 150 MHz)

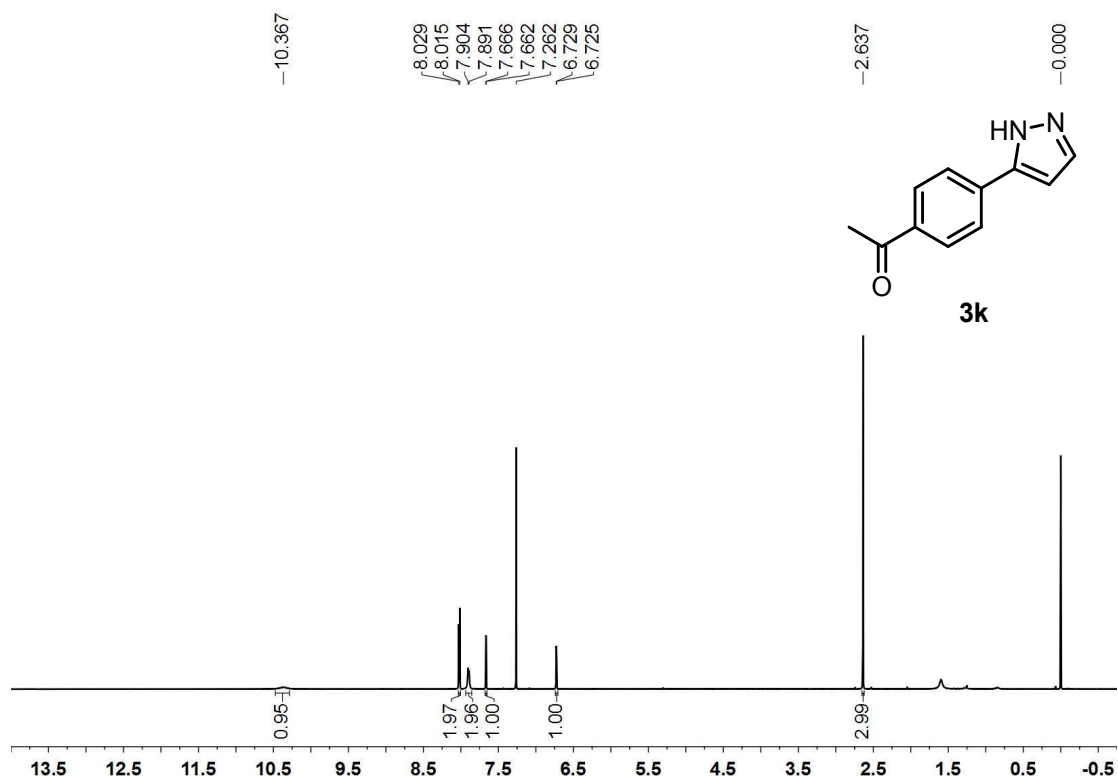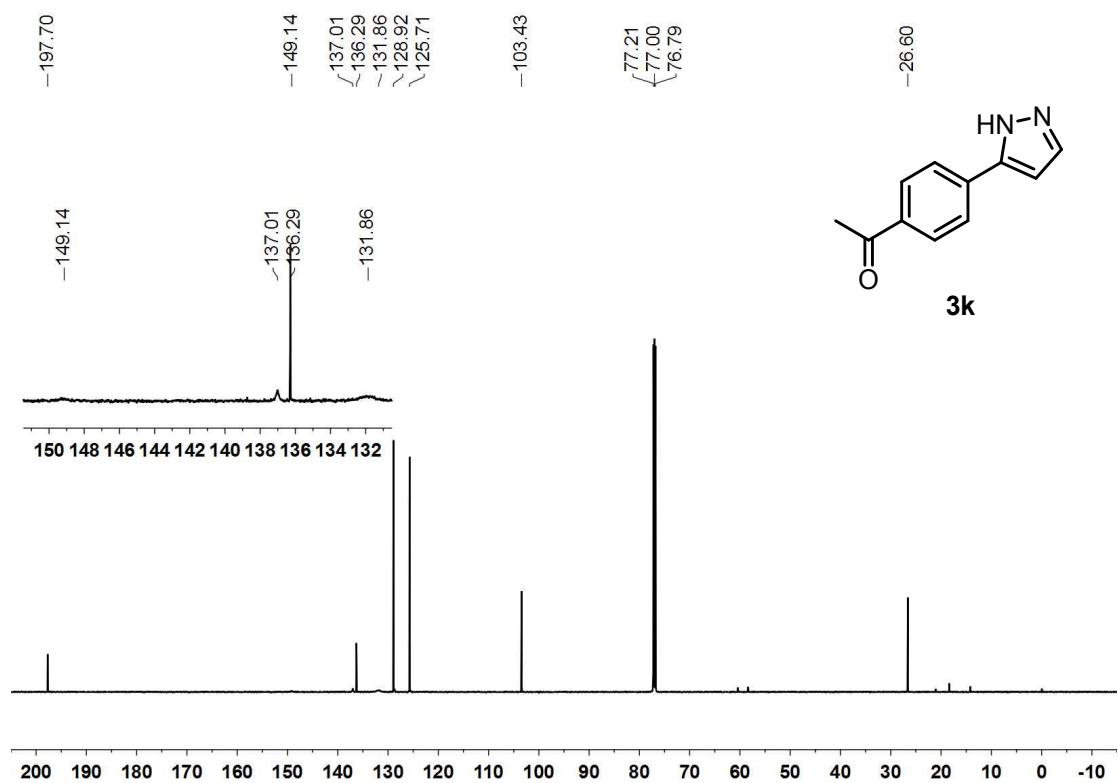

**31**  $^1\text{H-NMR}$  (600 MHz,  $\text{CDCl}_3$ ) &  $^{13}\text{C-NMR}$  ( $\text{CDCl}_3$ , 150 MHz)

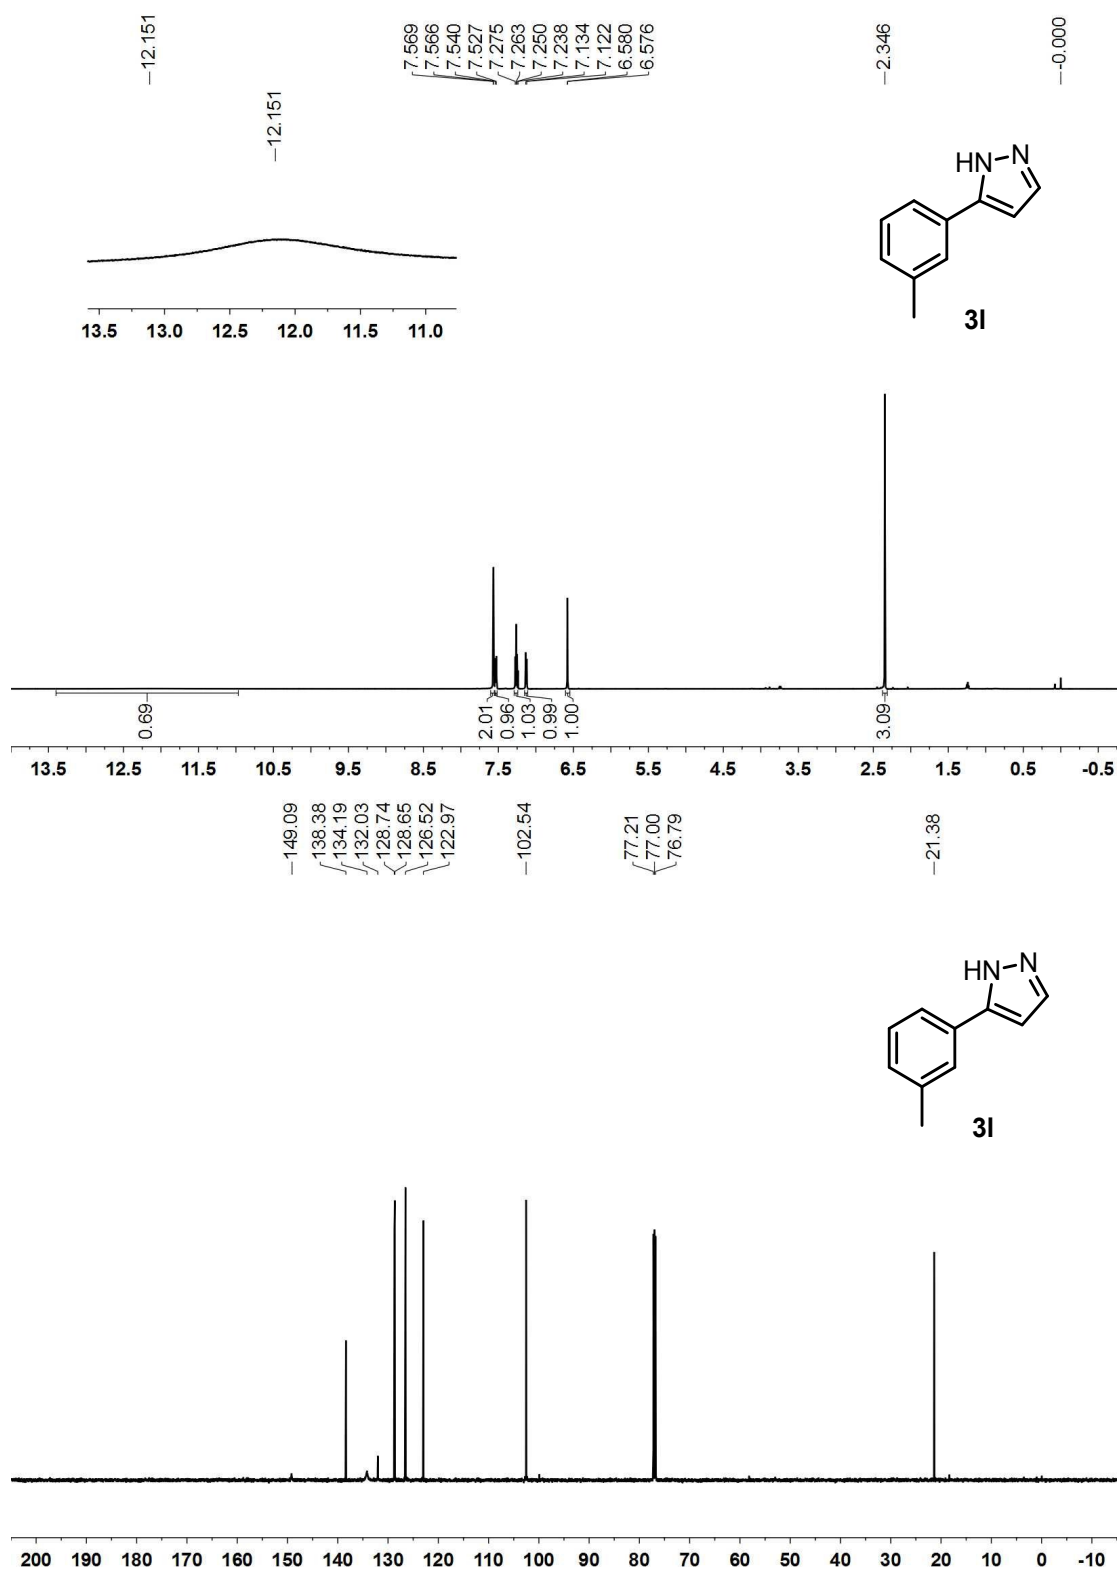

**3m**  $^1\text{H-NMR}$  (600 MHz,  $\text{CDCl}_3$ ) &  $^{13}\text{C-NMR}$  ( $\text{CDCl}_3$ , 150 MHz)

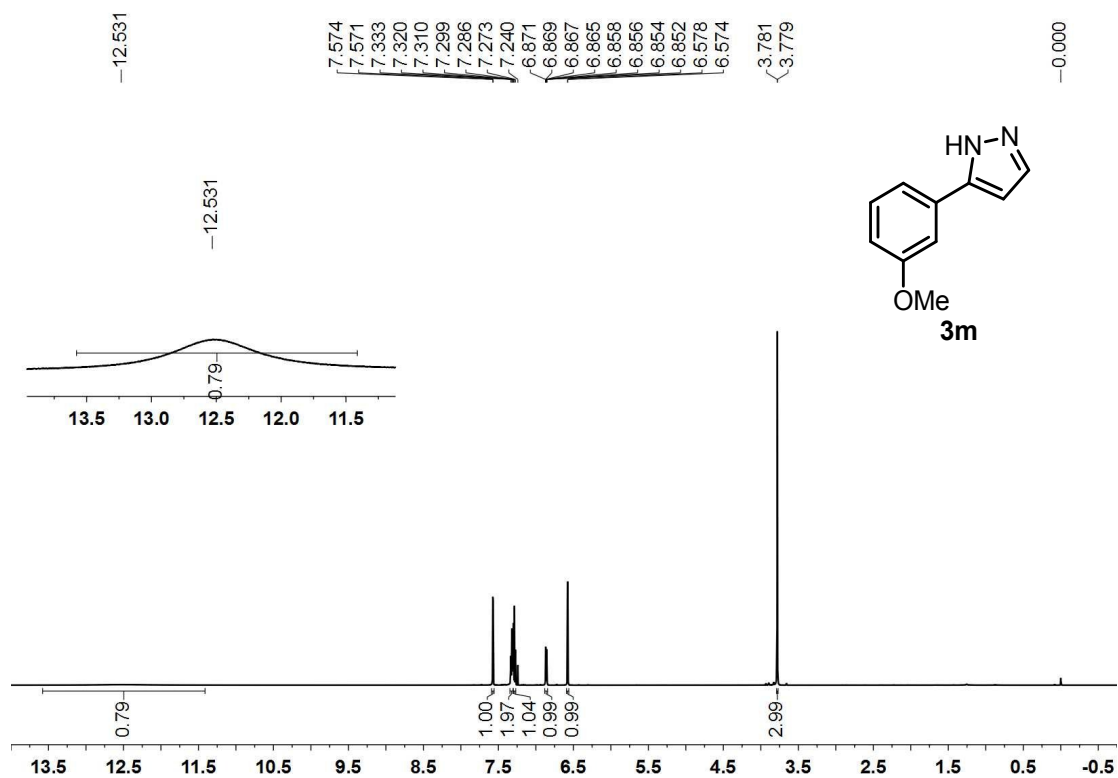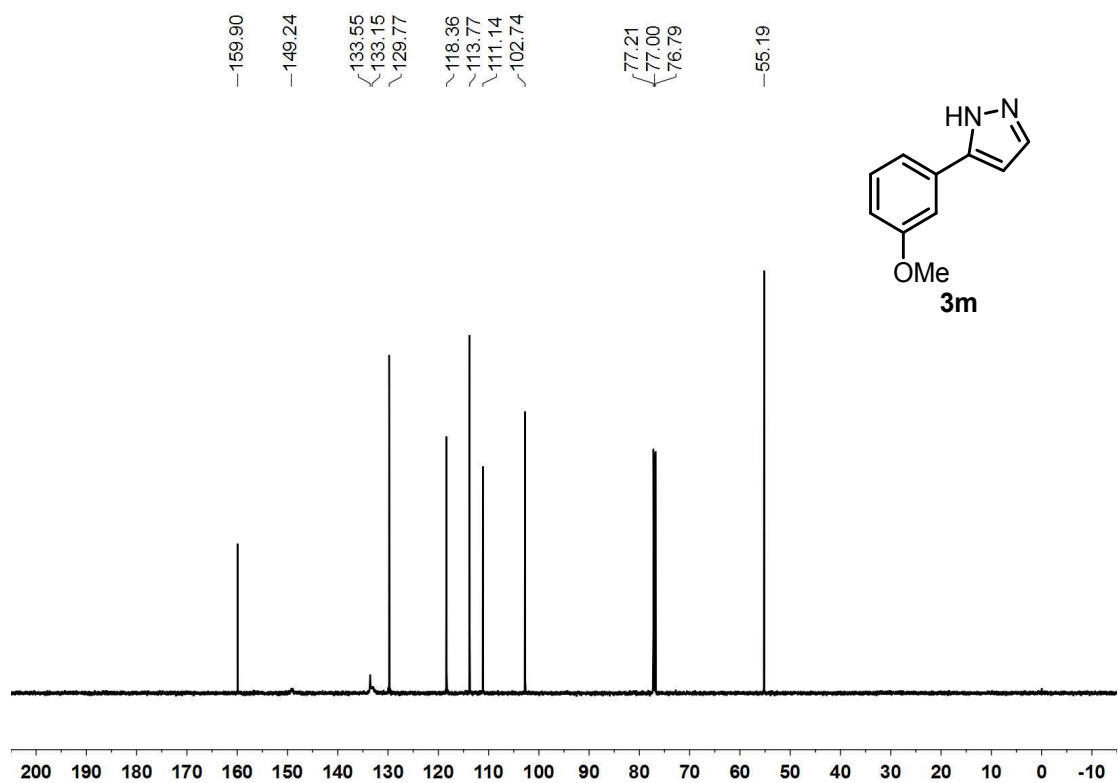

**3n**  $^1\text{H-NMR}$  (600 MHz,  $\text{CDCl}_3$ ) &  $^{13}\text{C-NMR}$  ( $\text{CDCl}_3$ , 150 MHz)

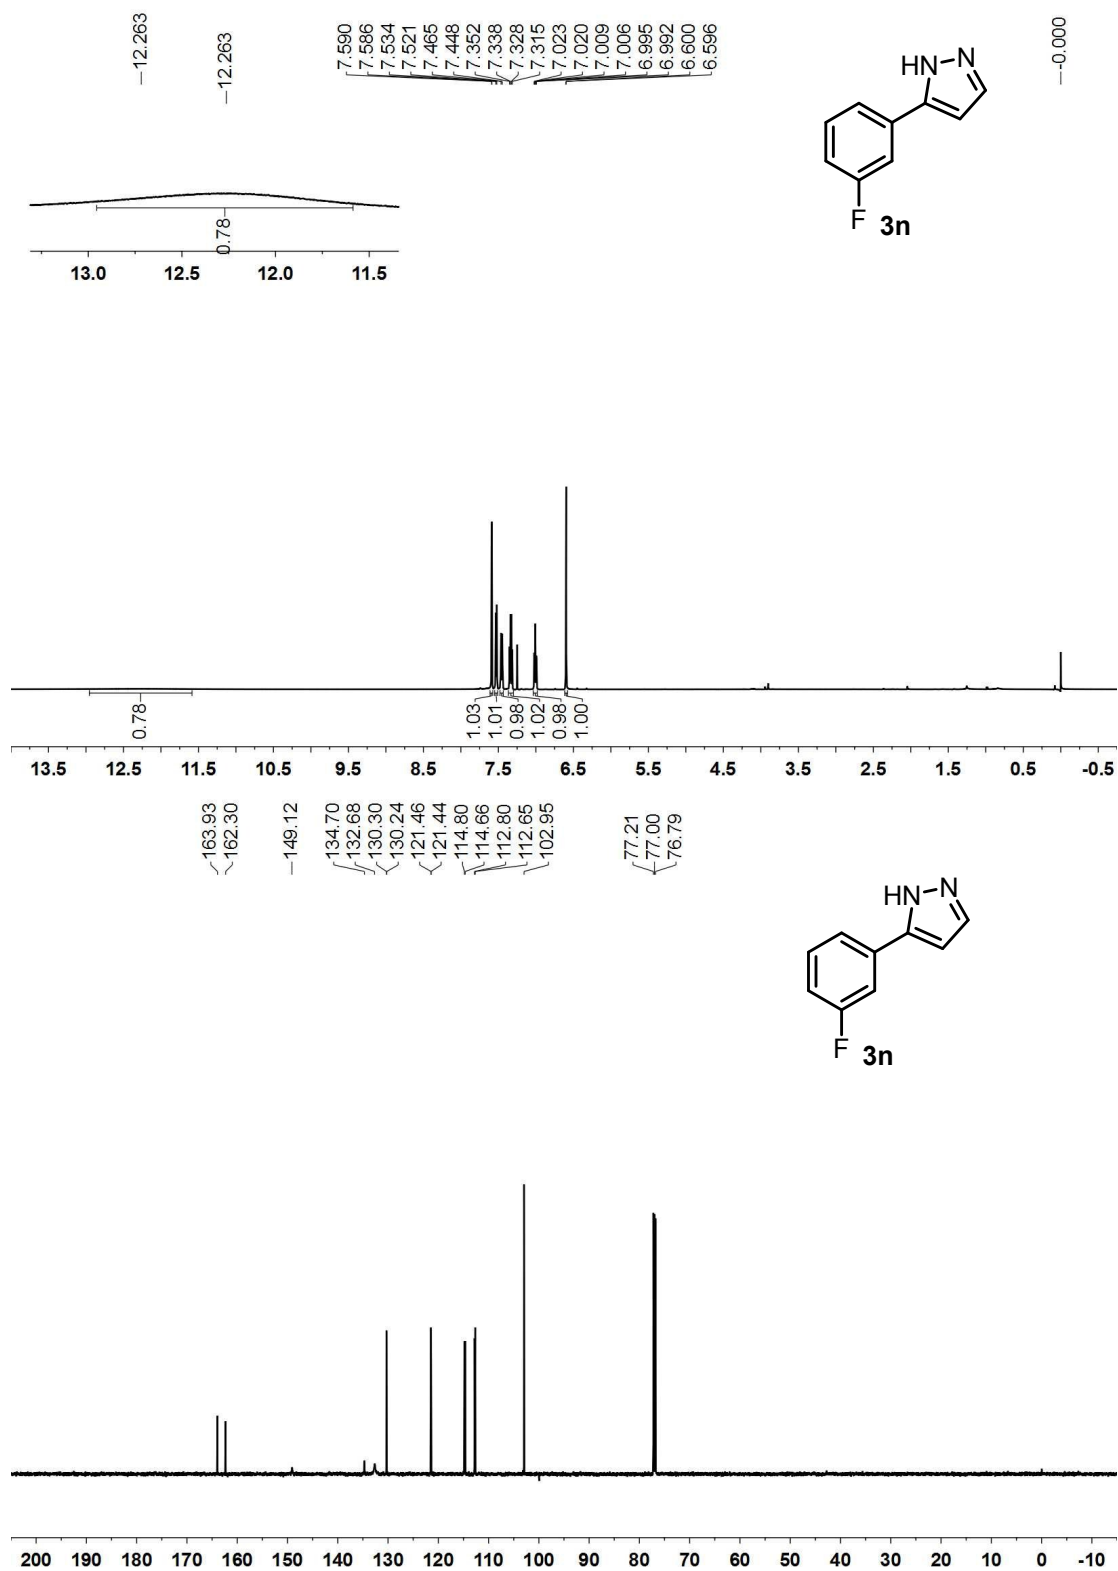



**3o** <sup>1</sup>H-NMR (600 MHz, CDCl<sub>3</sub>) & <sup>13</sup>C-NMR (CDCl<sub>3</sub>, 150 MHz)

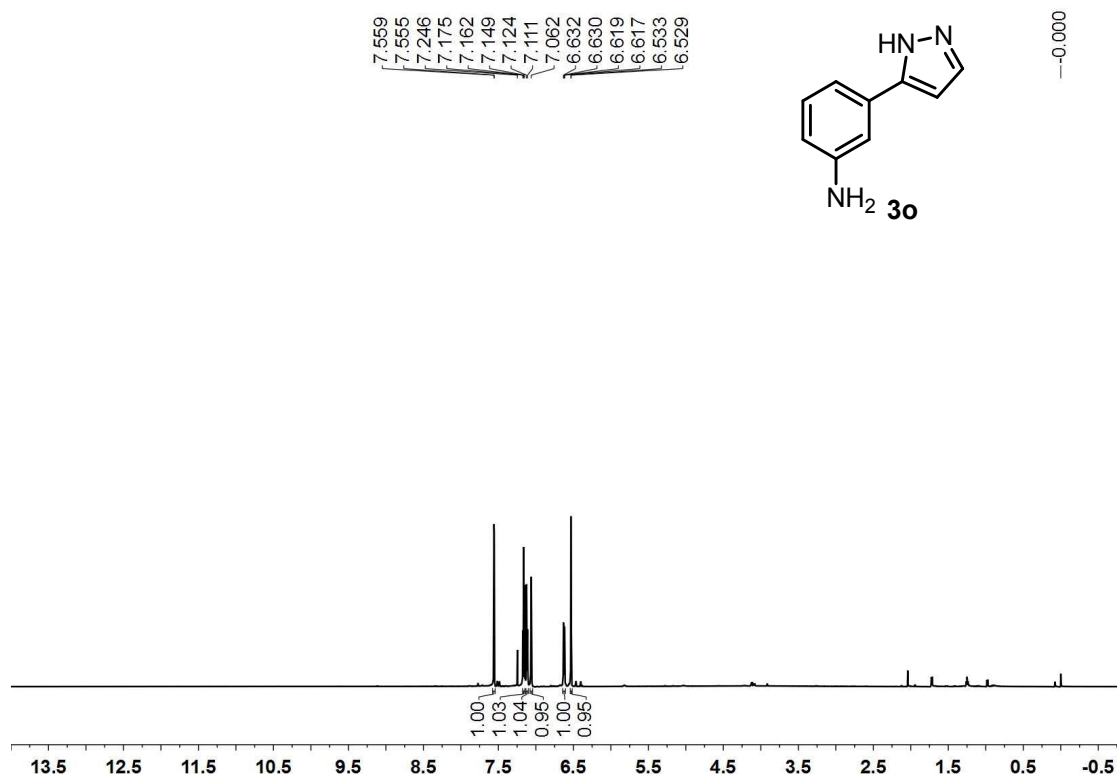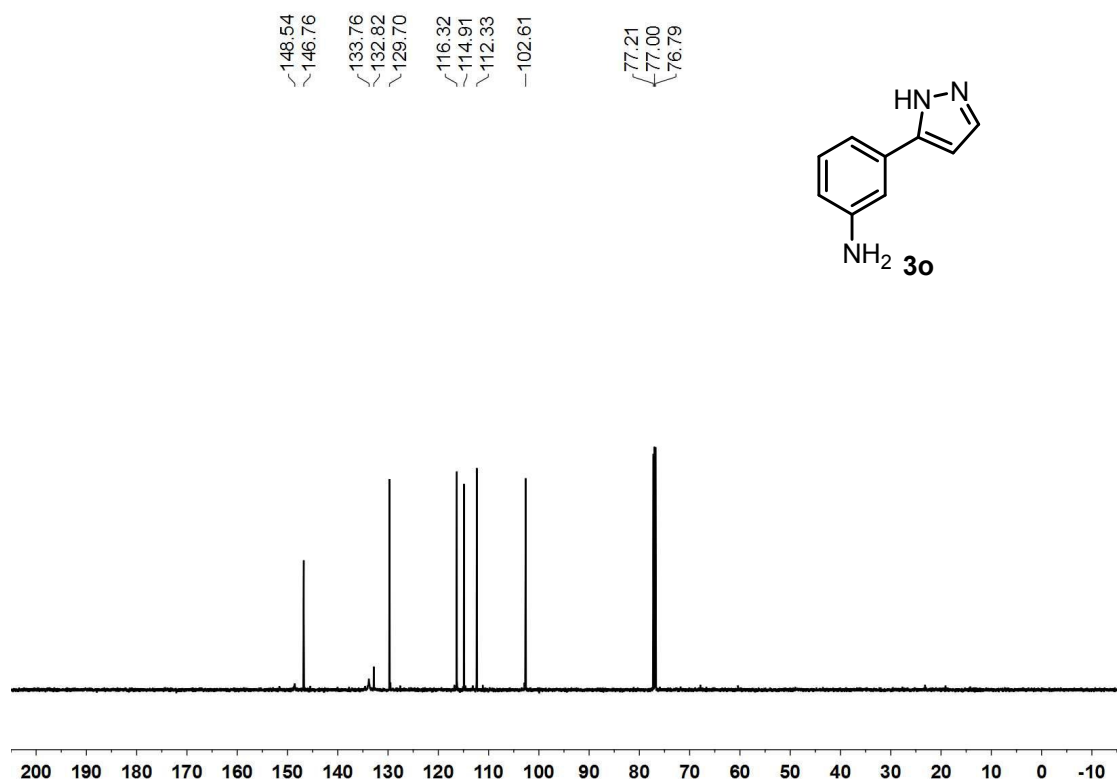

**3p**  $^1\text{H-NMR}$  (600 MHz,  $\text{CDCl}_3$ ) &  $^{13}\text{C-NMR}$  ( $\text{CDCl}_3$ , 150 MHz)

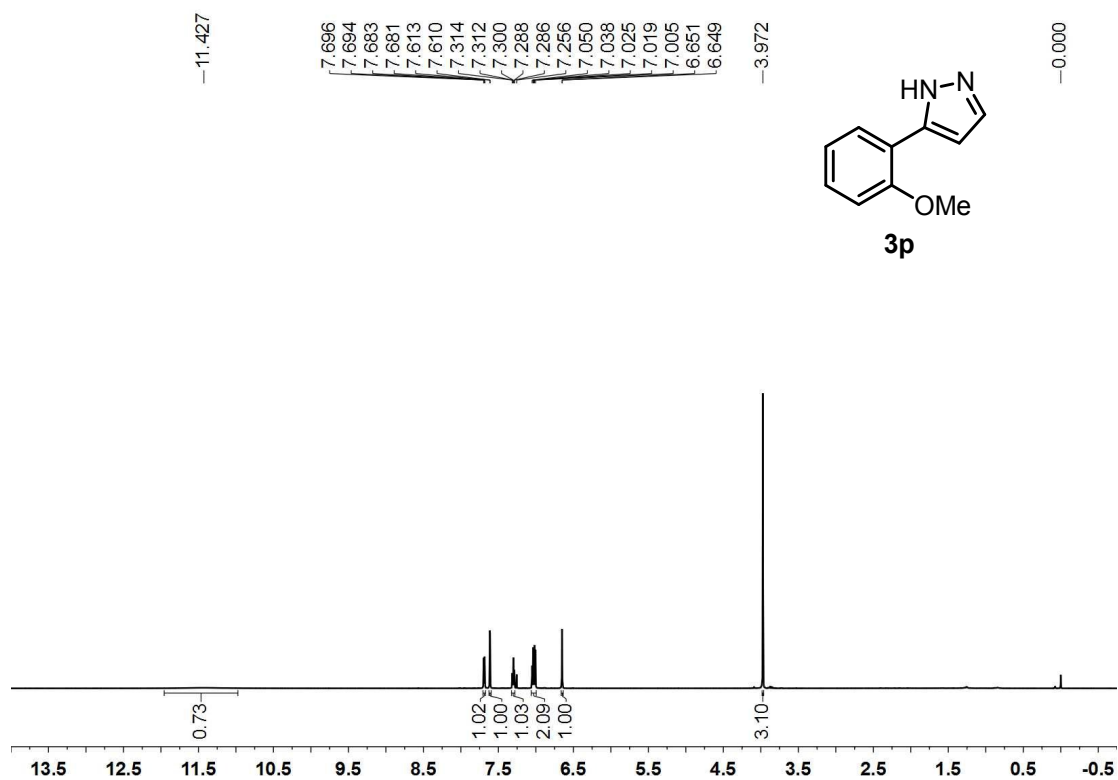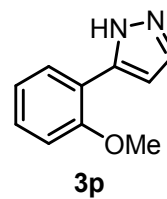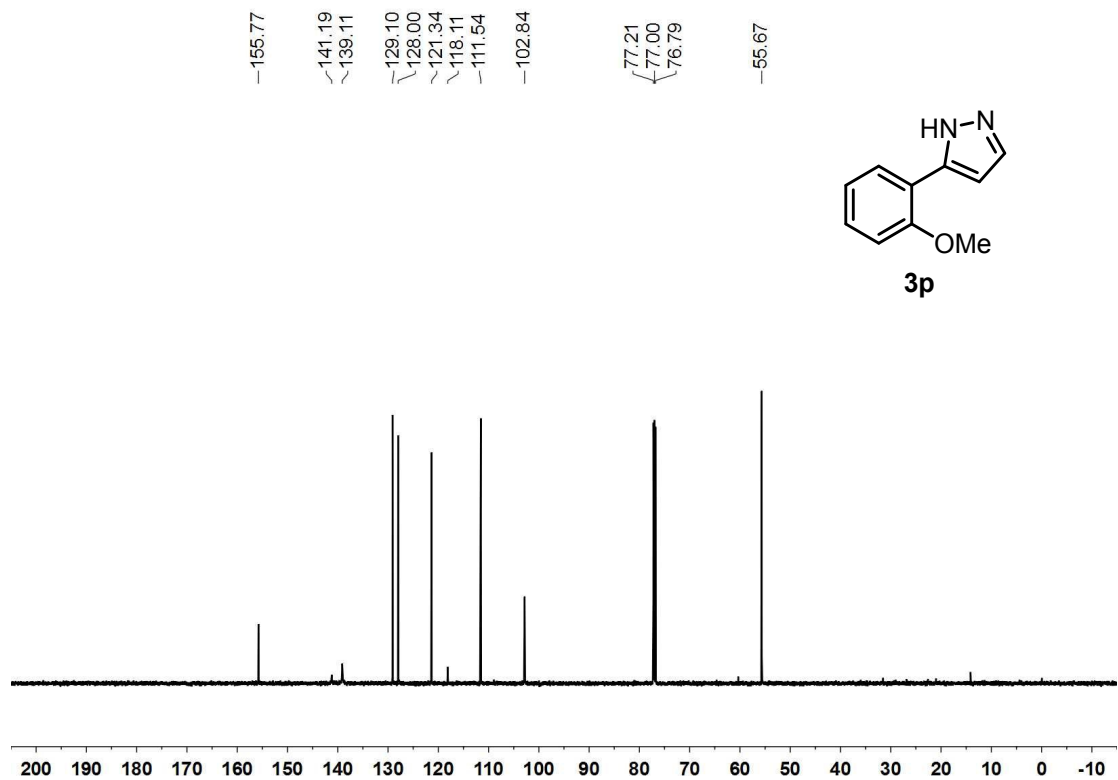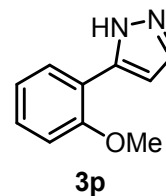

**3q** <sup>1</sup>H-NMR (600 MHz, CDCl<sub>3</sub>) & <sup>13</sup>C-NMR (CDCl<sub>3</sub>, 150 MHz)

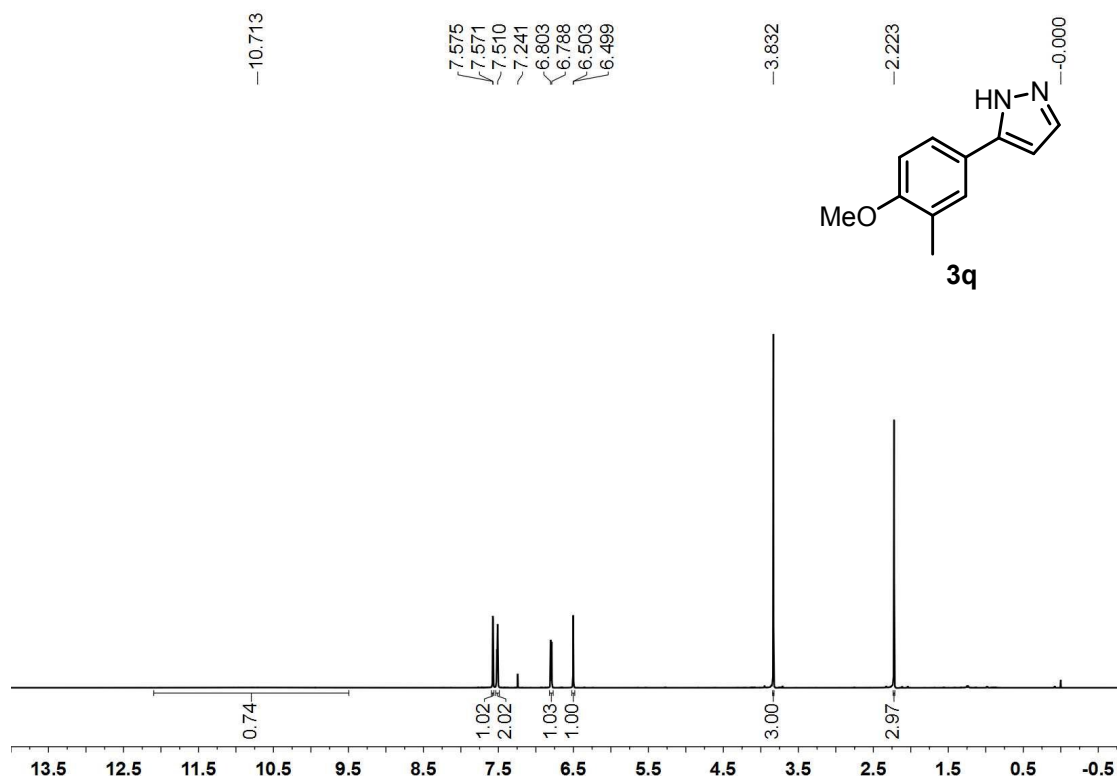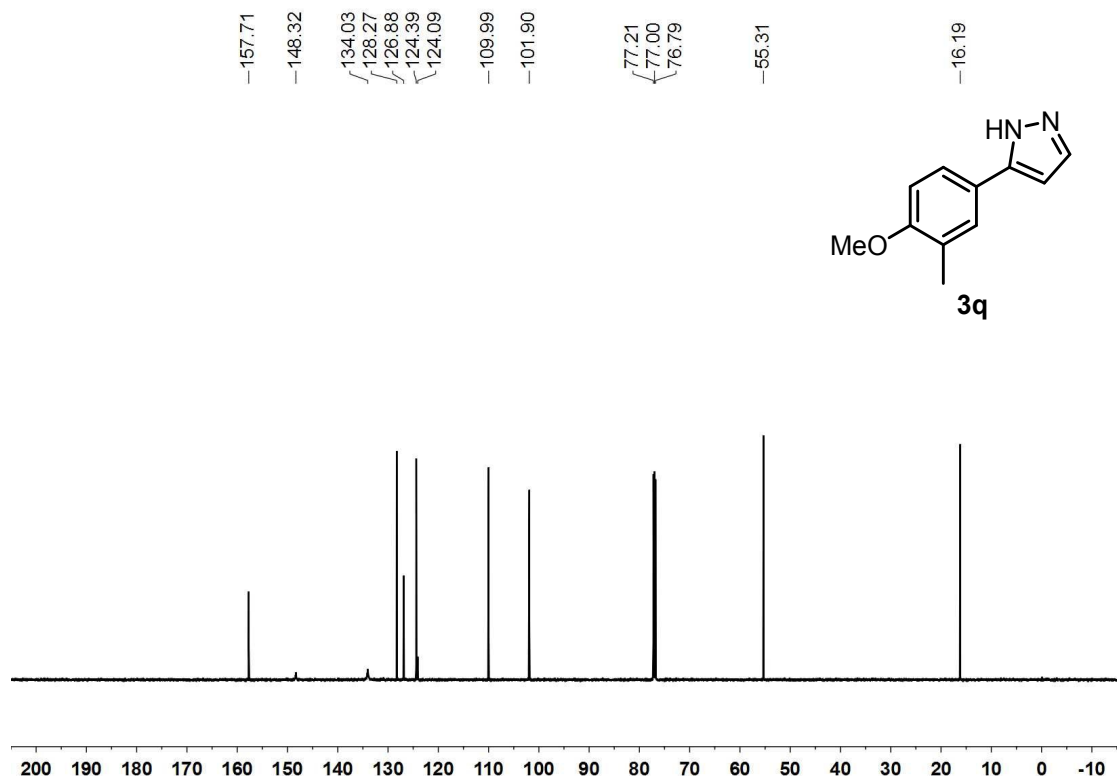

**3r**  $^1\text{H-NMR}$  (600 MHz,  $\text{CDCl}_3$ ) &  $^{13}\text{C-NMR}$  ( $\text{CDCl}_3$ , 150 MHz)

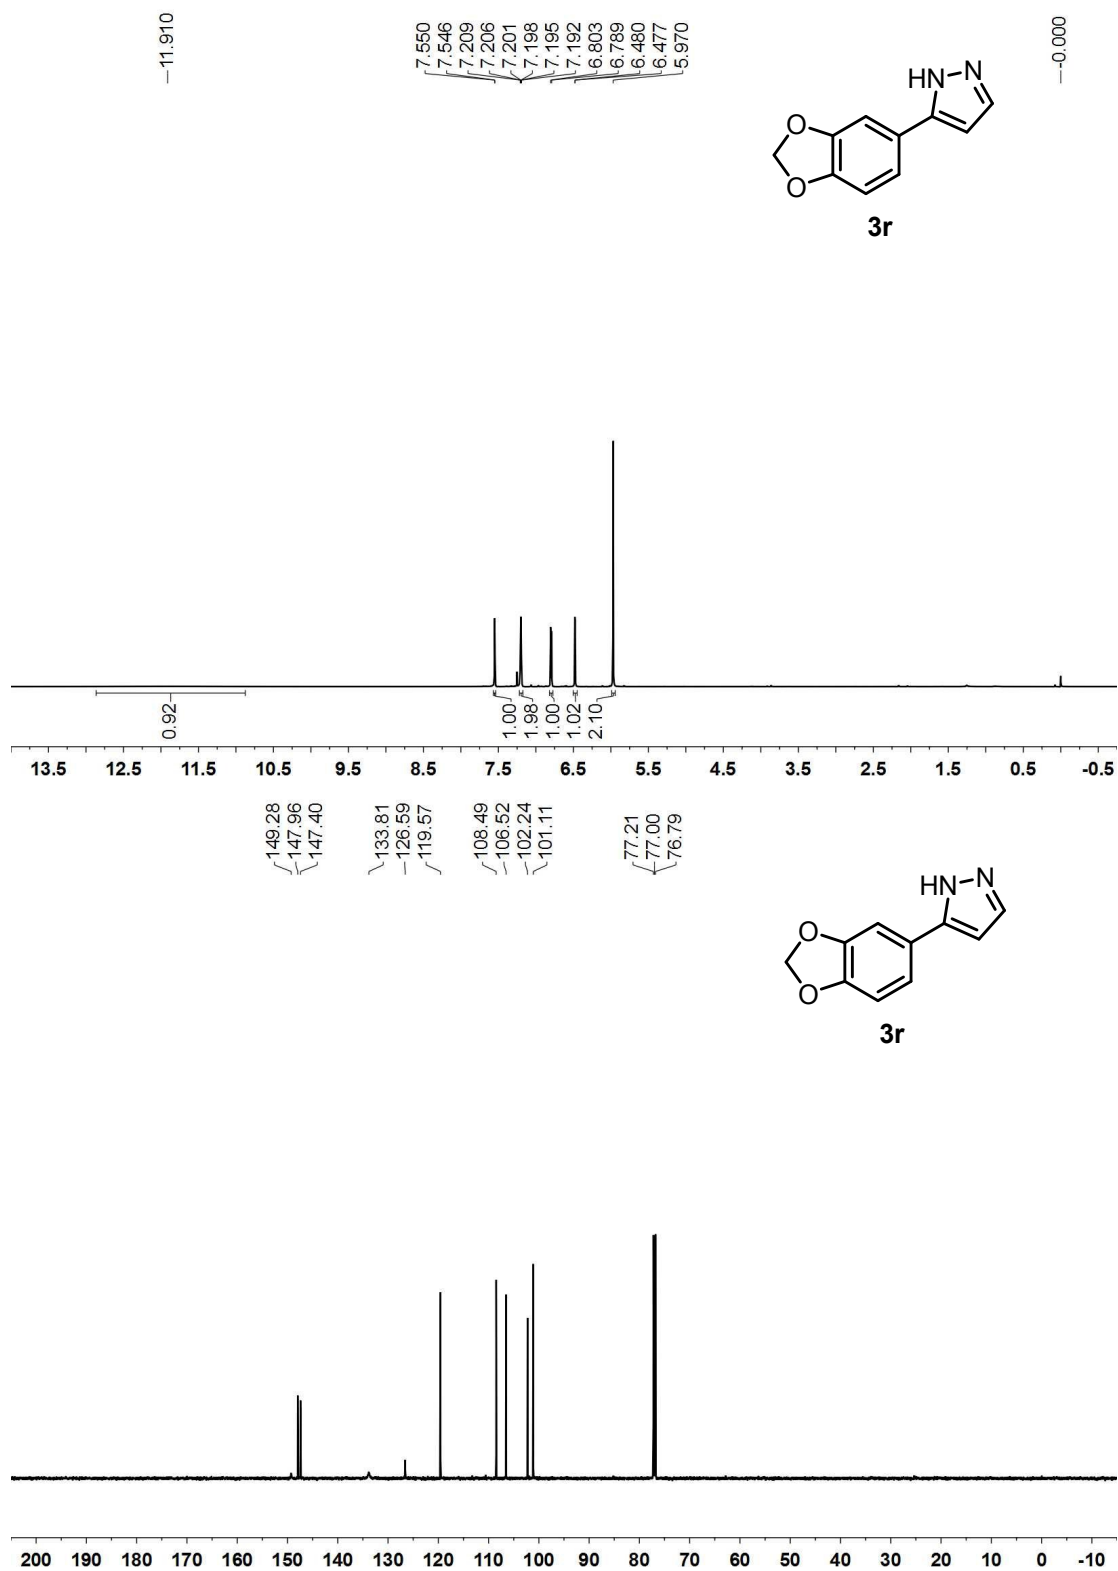

**3s**  $^1\text{H-NMR}$  (600 MHz,  $\text{CDCl}_3$ ) &  $^{13}\text{C-NMR}$  ( $\text{CDCl}_3$ , 150 MHz)

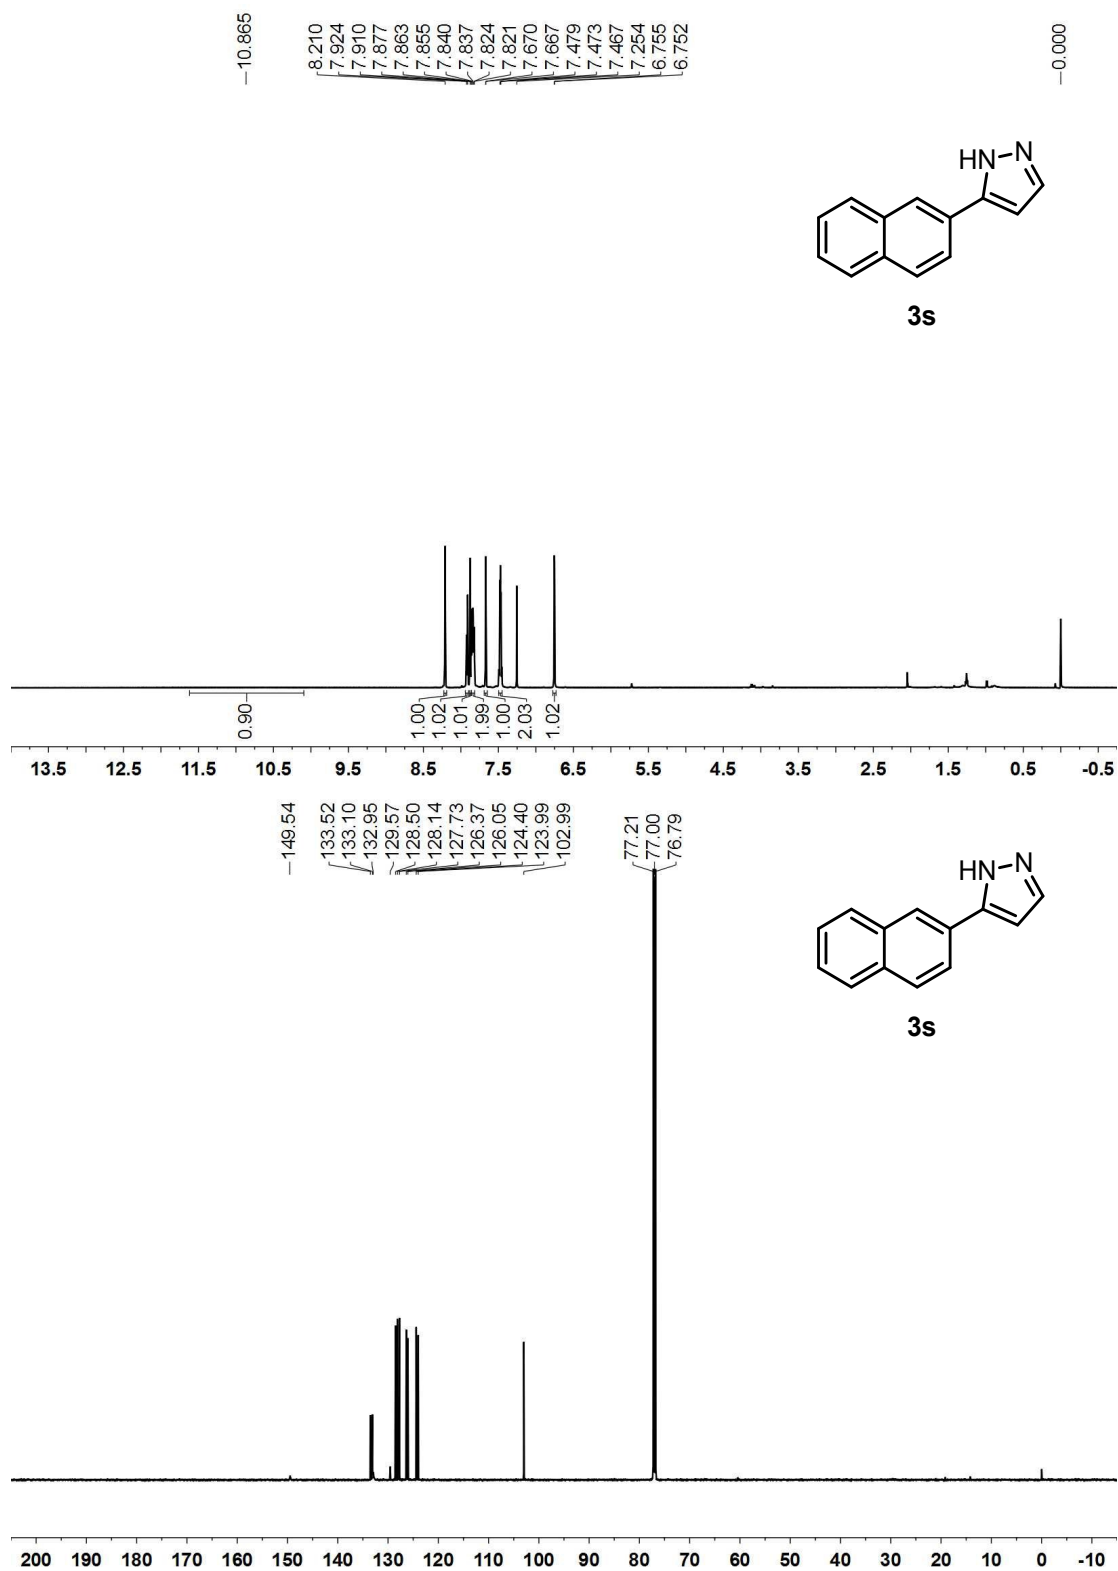

**3t**  $^1\text{H-NMR}$  (600 MHz,  $\text{CDCl}_3$ ) &  $^{13}\text{C-NMR}$  ( $\text{CDCl}_3$ , 150 MHz)

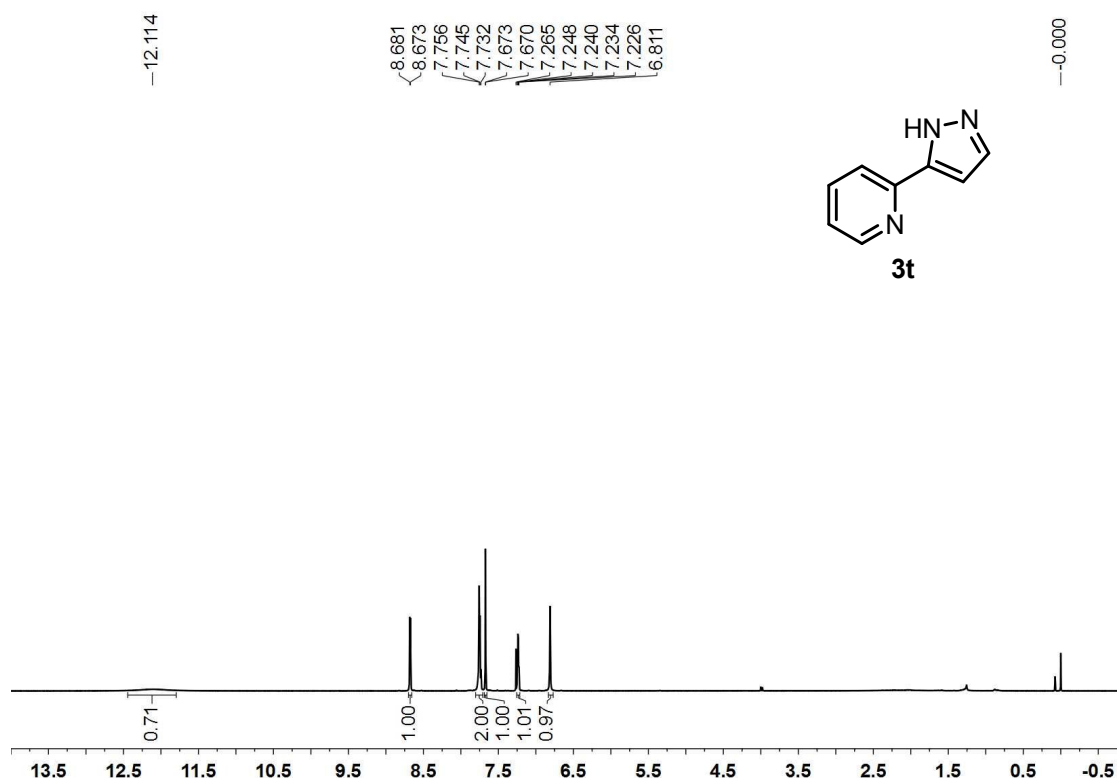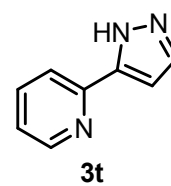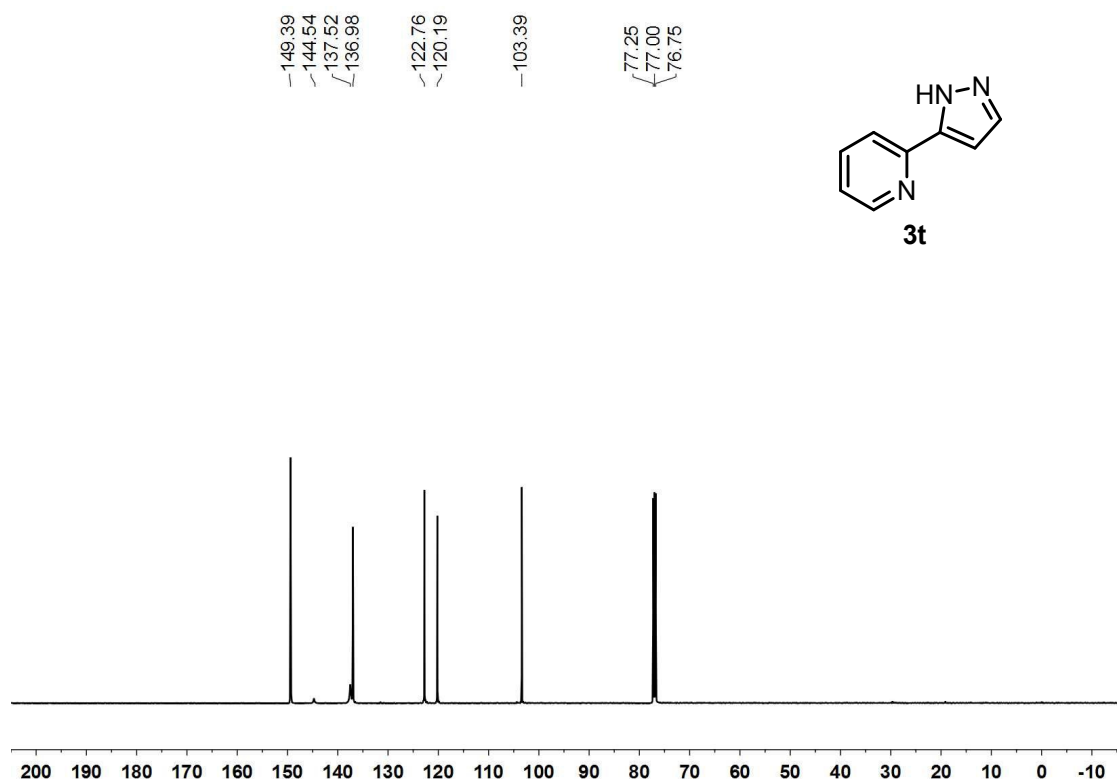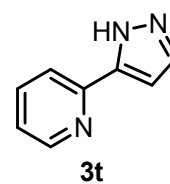

**3u**  $^1\text{H-NMR}$  (600 MHz,  $\text{CDCl}_3$ ) &  $^{13}\text{C-NMR}$  ( $\text{CDCl}_3$ , 150 MHz)

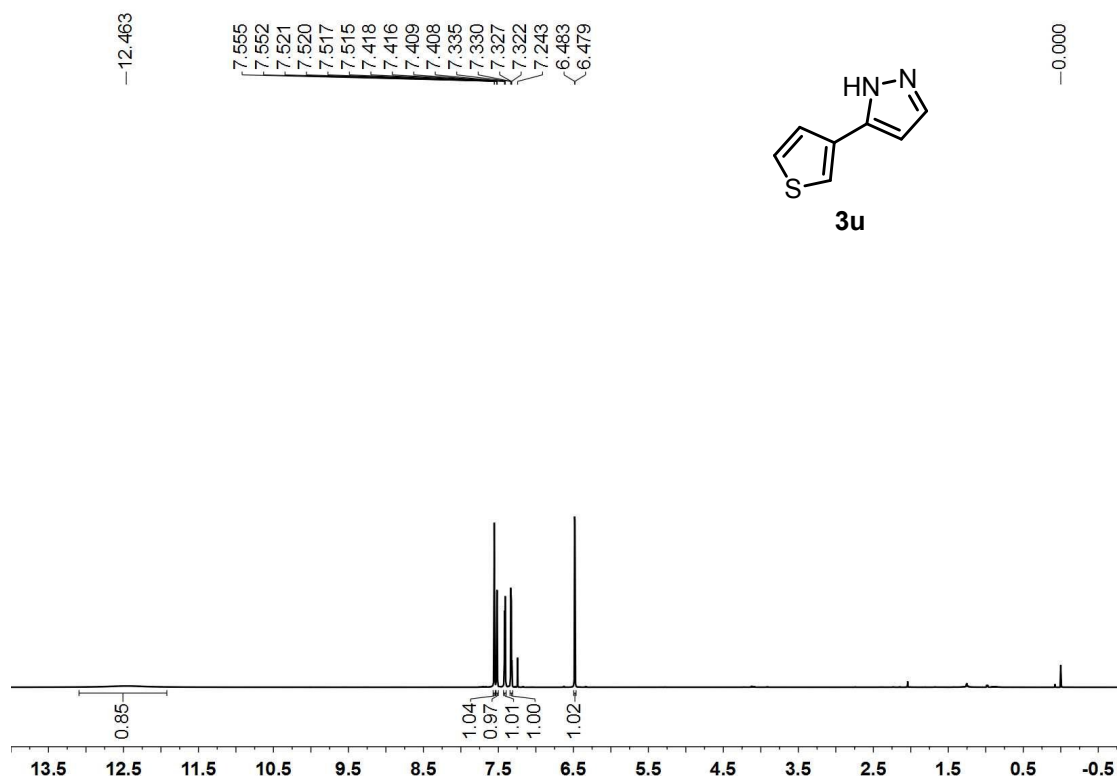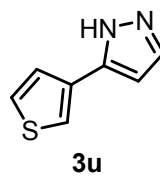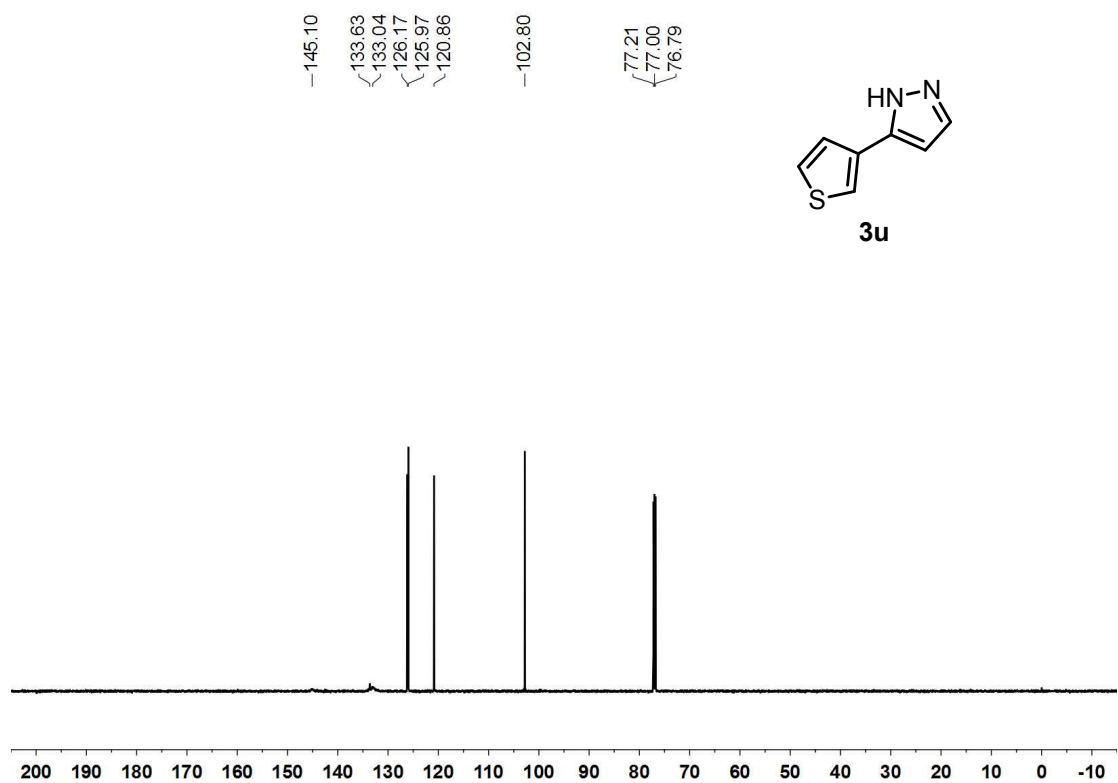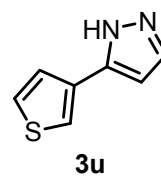

**3v** <sup>1</sup>H-NMR (600 MHz, CDCl<sub>3</sub>) & <sup>13</sup>C-NMR (CDCl<sub>3</sub>, 150 MHz)

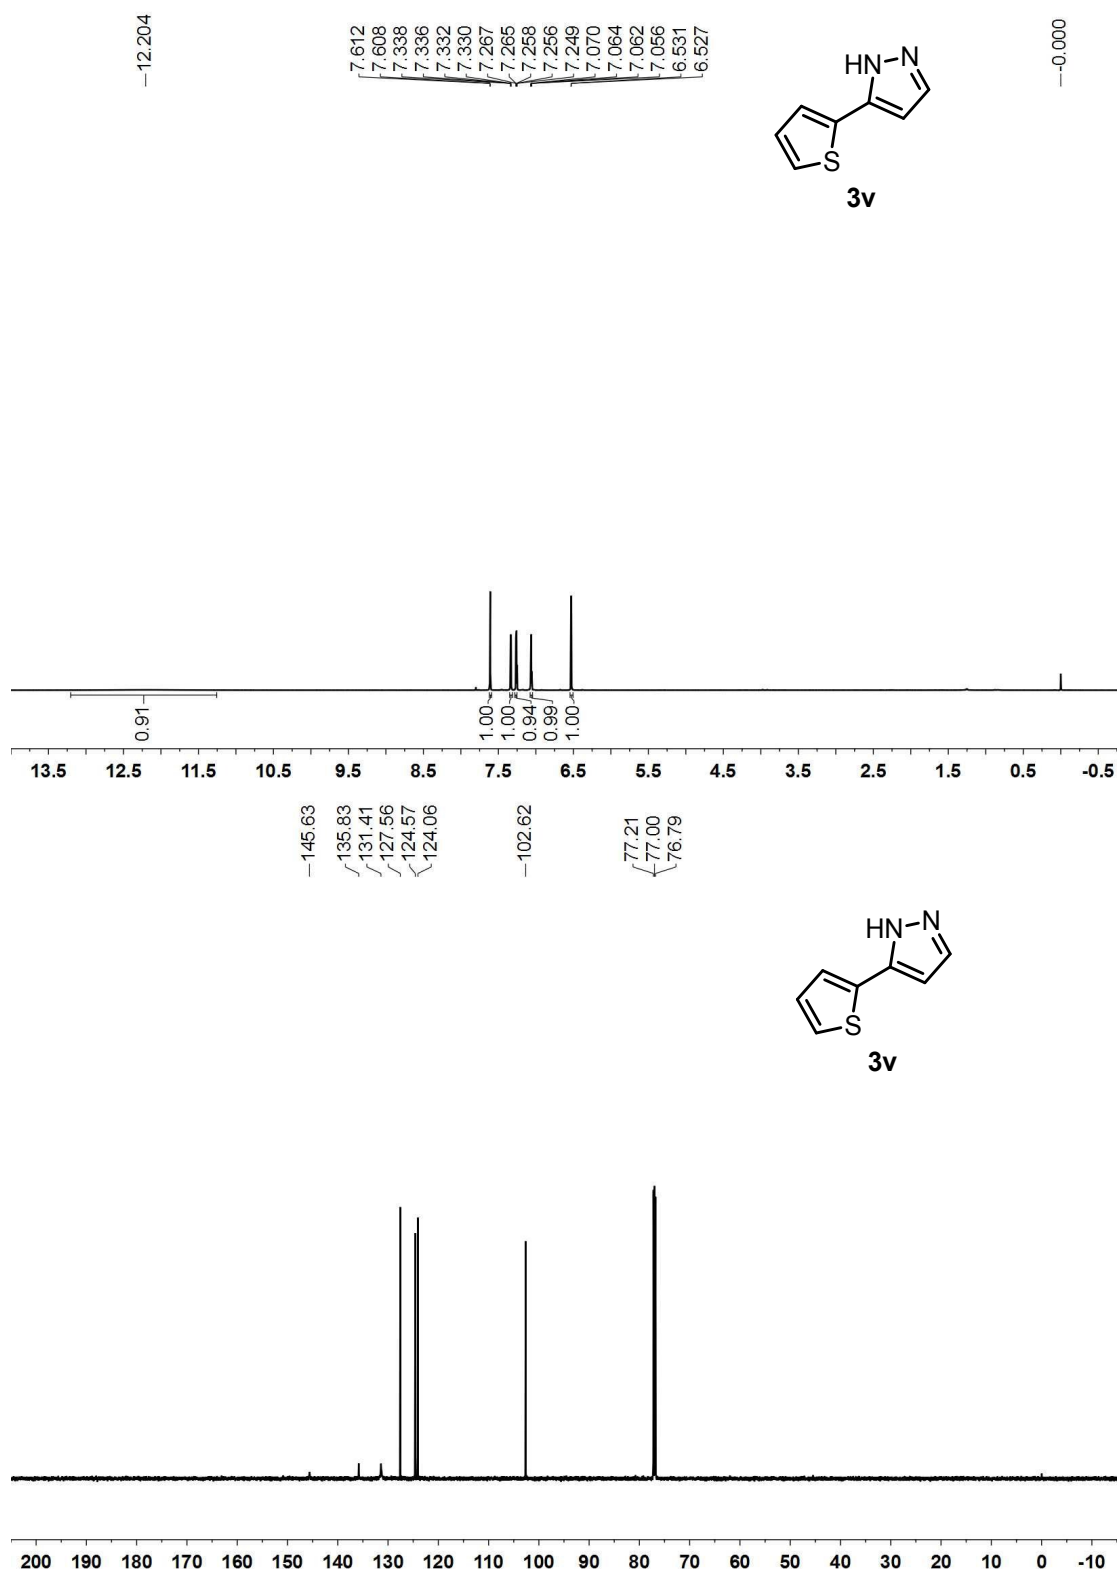



5a <sup>1</sup>H-NMR (600 MHz, CDCl<sub>3</sub>) & <sup>13</sup>C-NMR (CDCl<sub>3</sub>, 125 MHz)

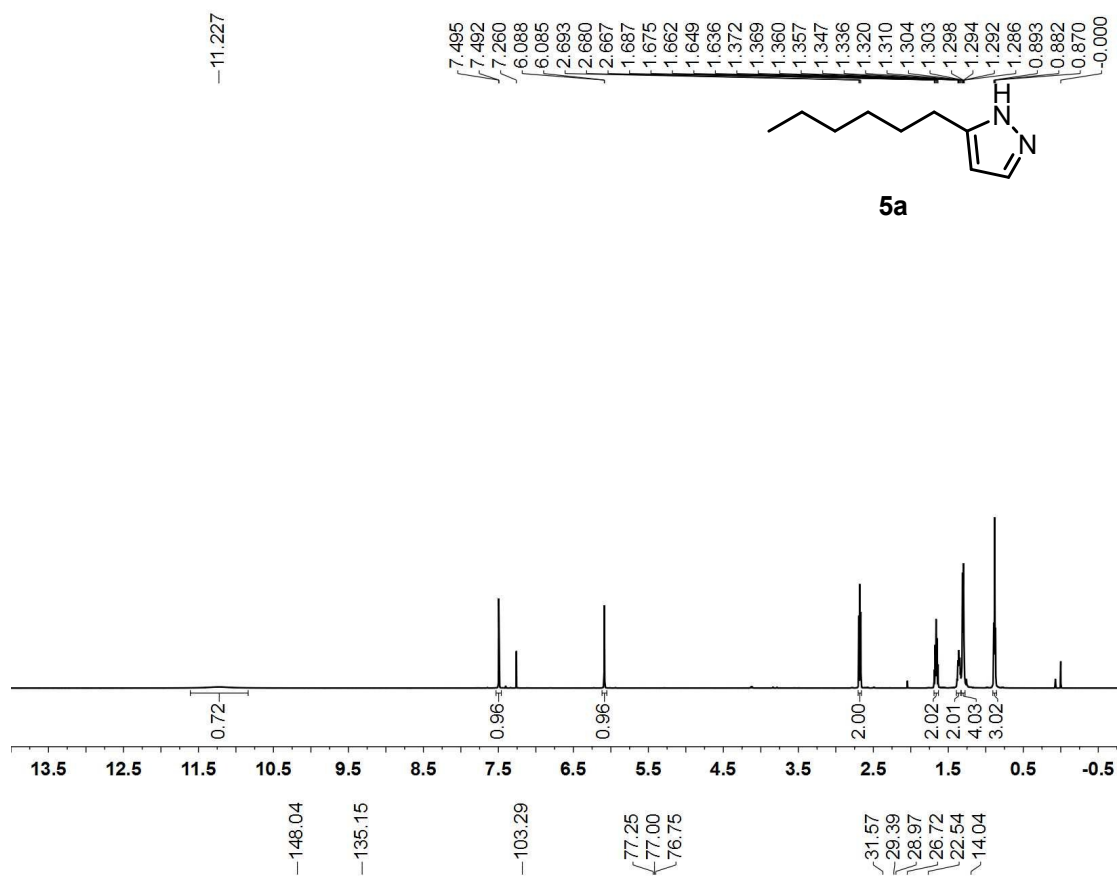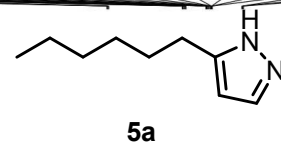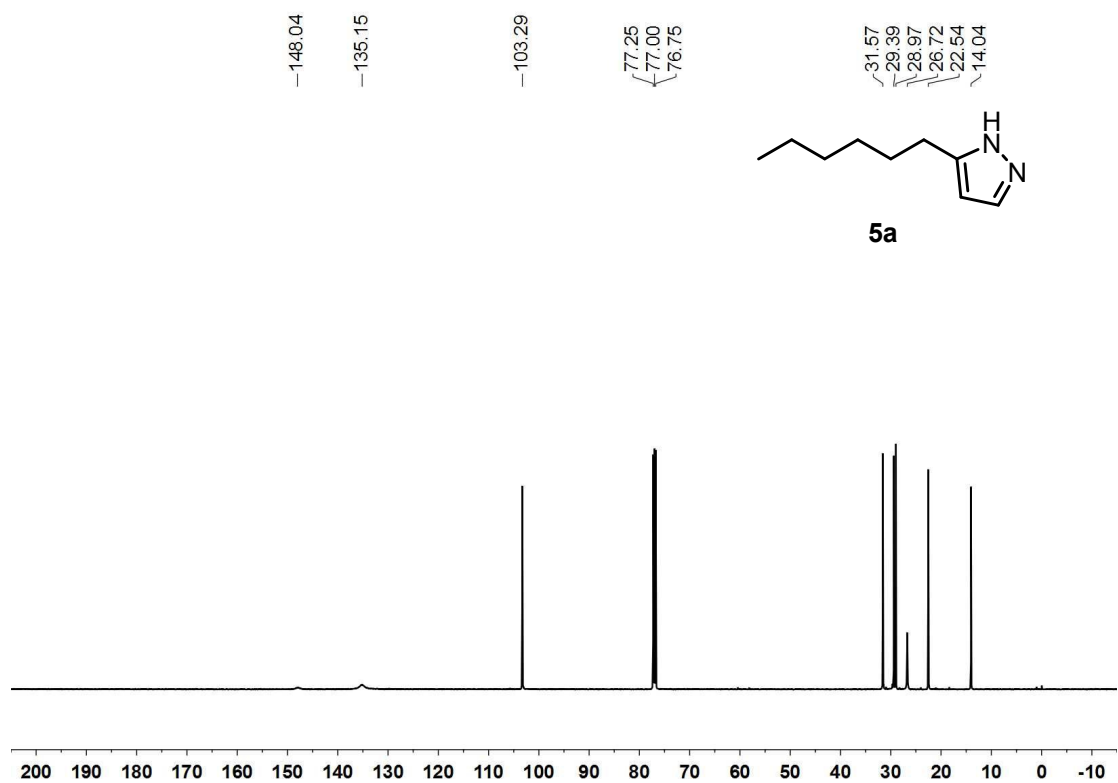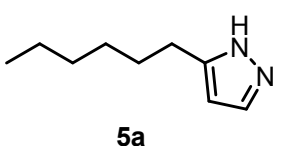

**5b**  $^1\text{H-NMR}$  (600 MHz,  $\text{CDCl}_3$ ) &  $^{13}\text{C-NMR}$  ( $\text{CDCl}_3$ , 150 MHz)

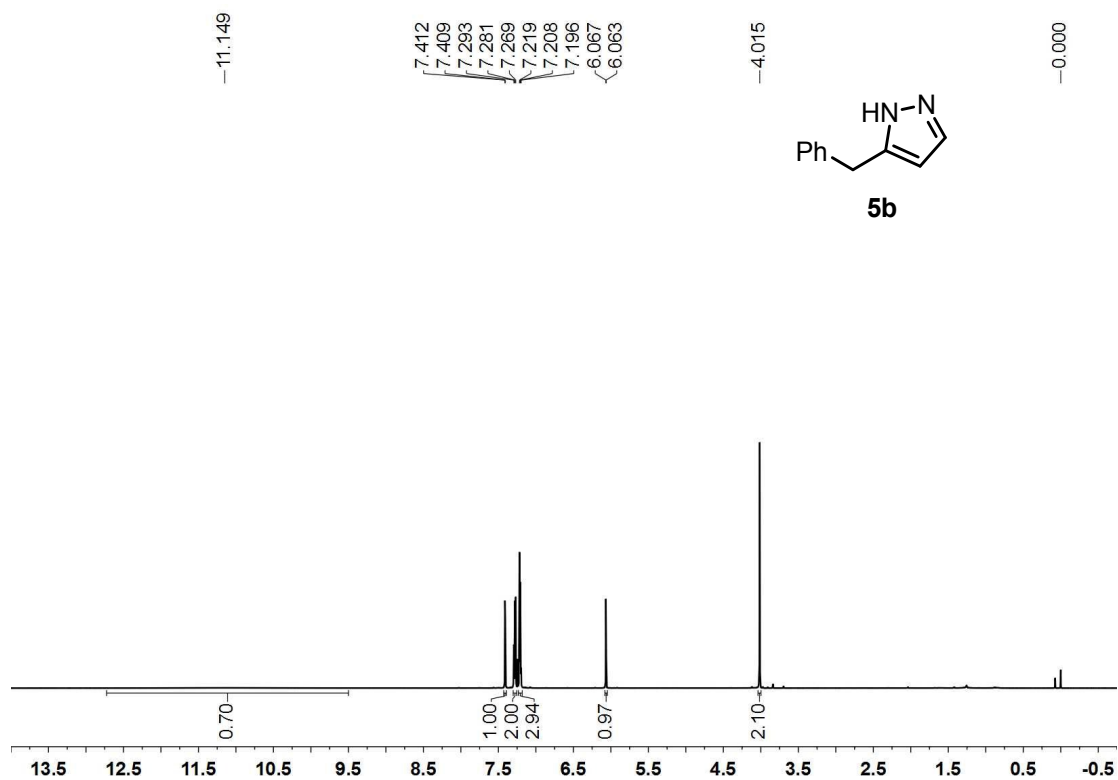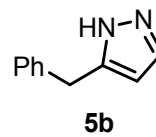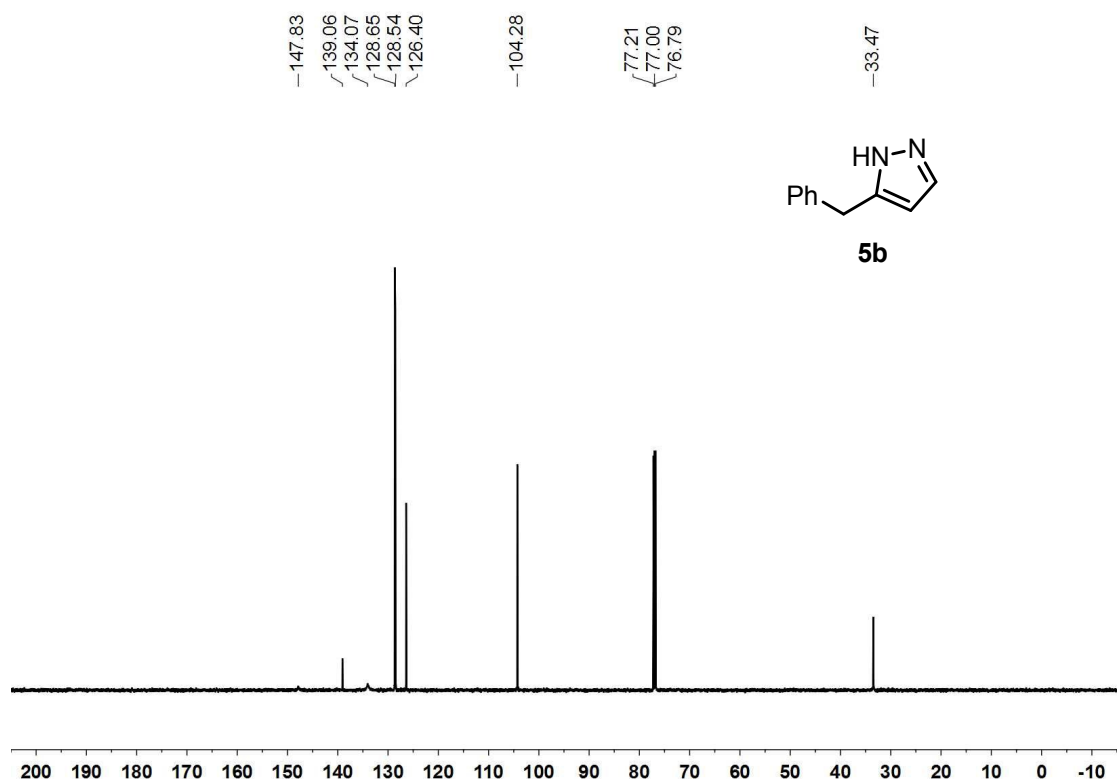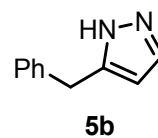

**5c**  $^1\text{H-NMR}$  (600 MHz,  $\text{CDCl}_3$ ) &  $^{13}\text{C-NMR}$  ( $\text{CDCl}_3$ , 150 MHz)

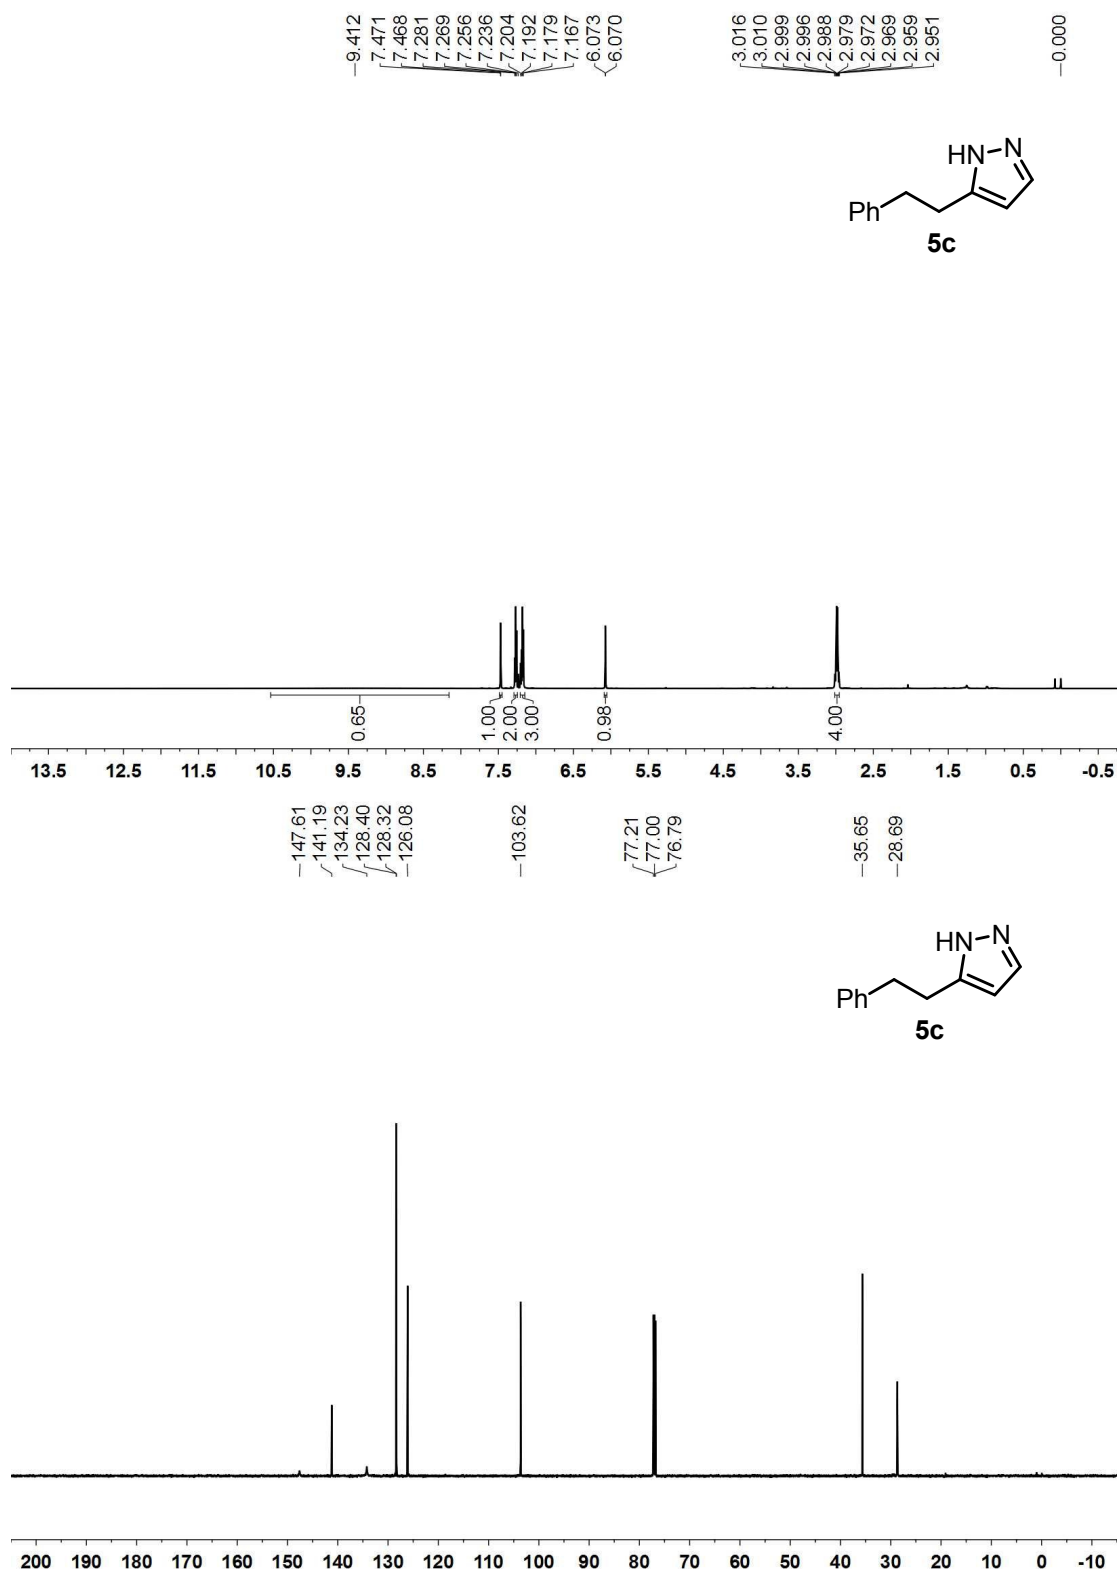

**5d** <sup>1</sup>H-NMR (600 MHz, CDCl<sub>3</sub>) & <sup>13</sup>C-NMR (CDCl<sub>3</sub>, 150 MHz)

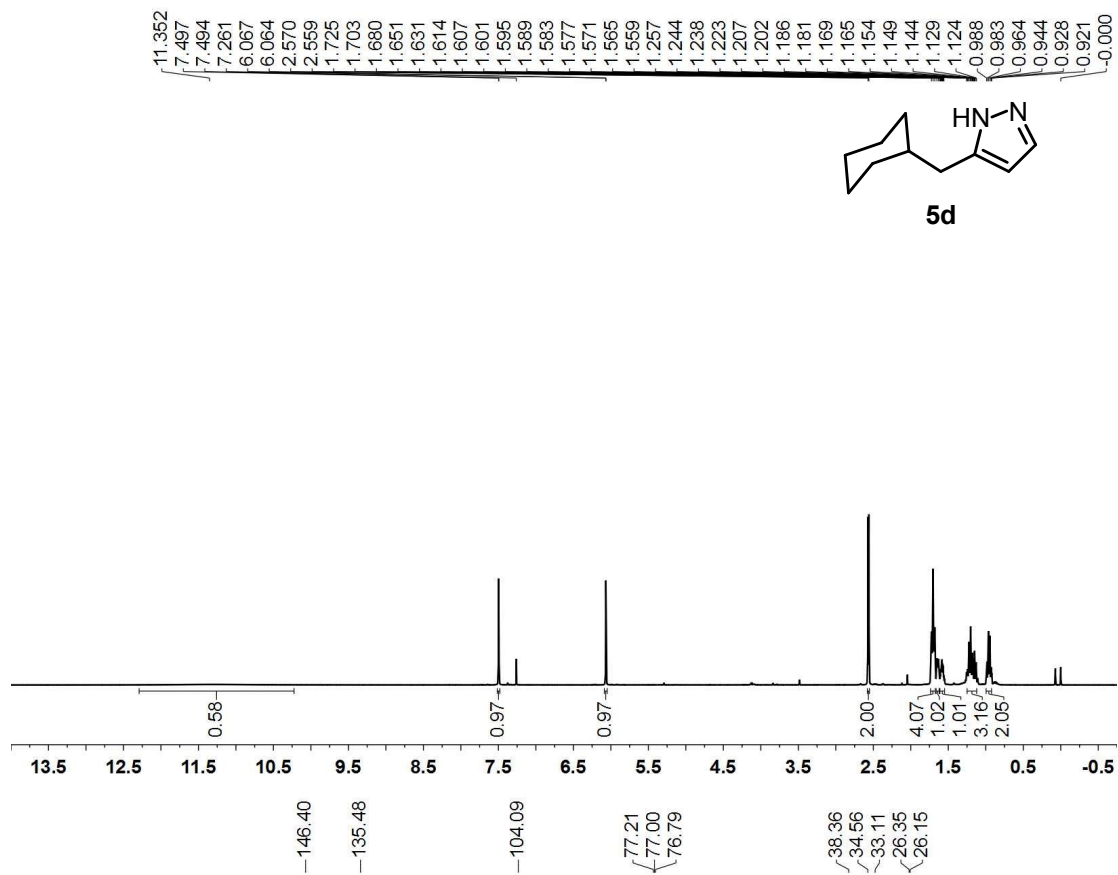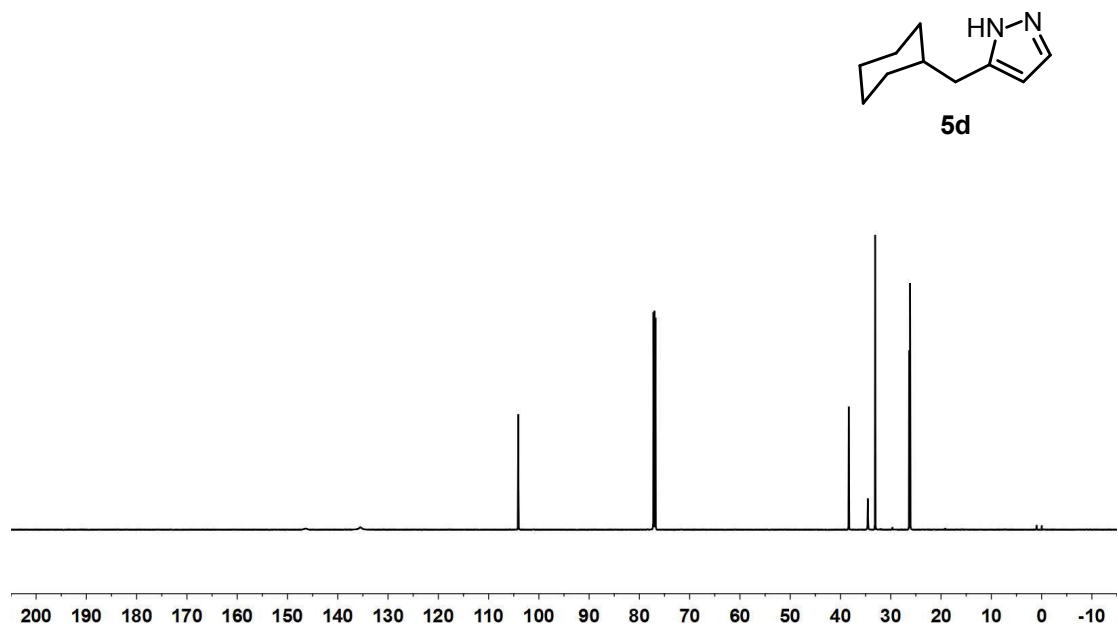

5e <sup>1</sup>H-NMR (600 MHz, CDCl<sub>3</sub>) & <sup>13</sup>C-NMR (CDCl<sub>3</sub>, 150 MHz)

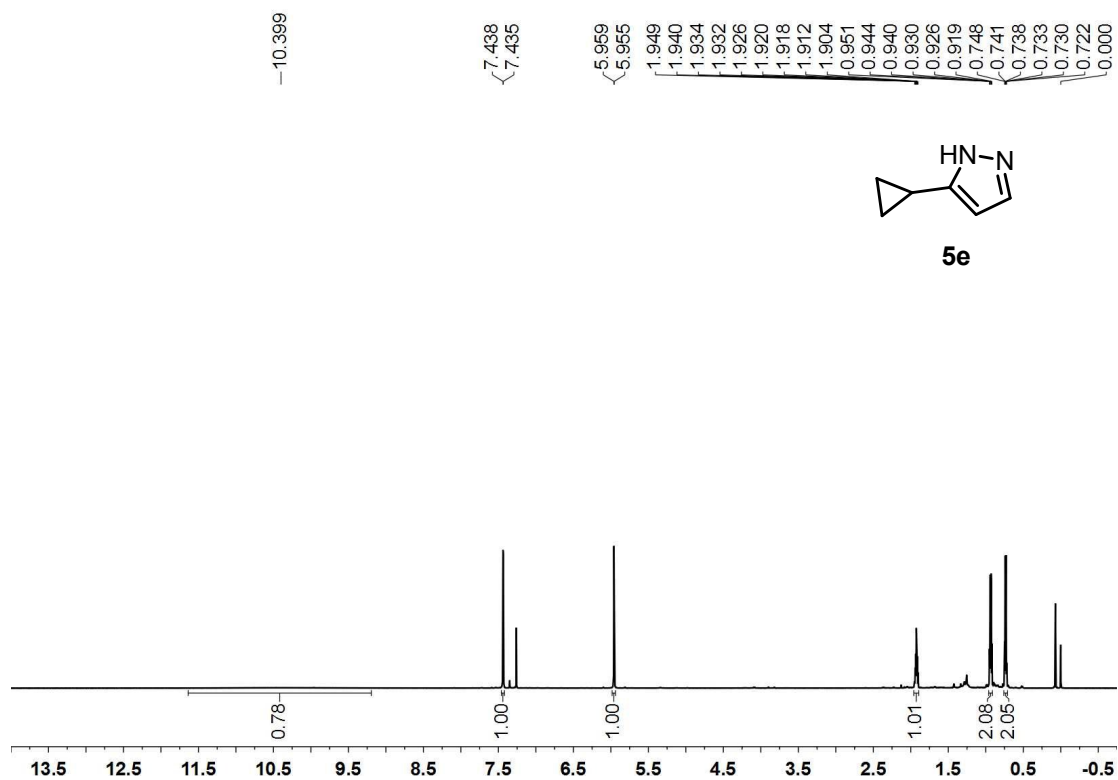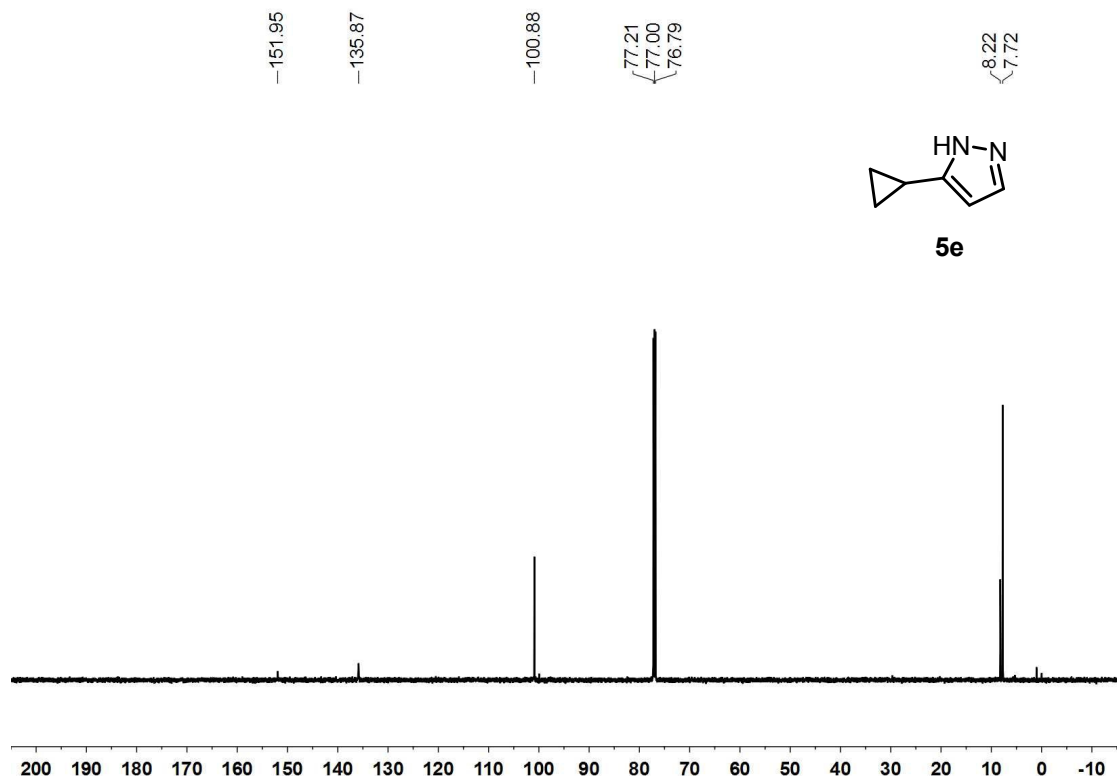

**5f**  $^1\text{H-NMR}$  (600 MHz,  $\text{CDCl}_3$ ) &  $^{13}\text{C-NMR}$  ( $\text{CDCl}_3$ , 150 MHz)

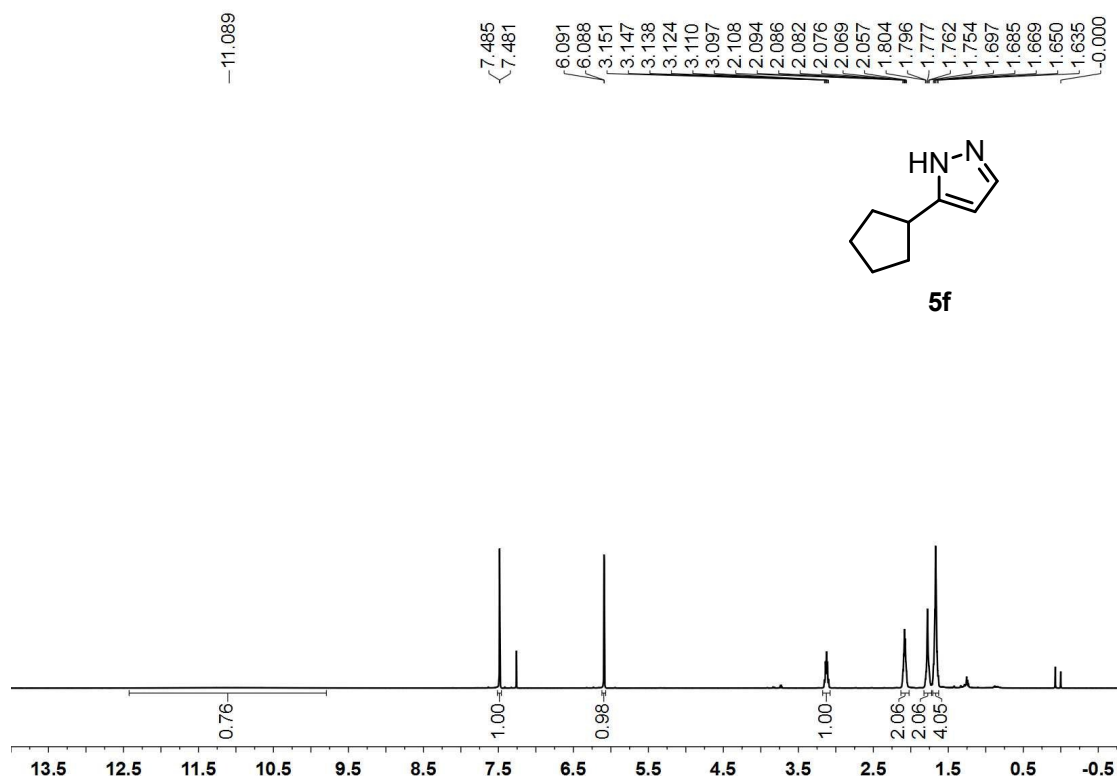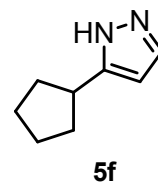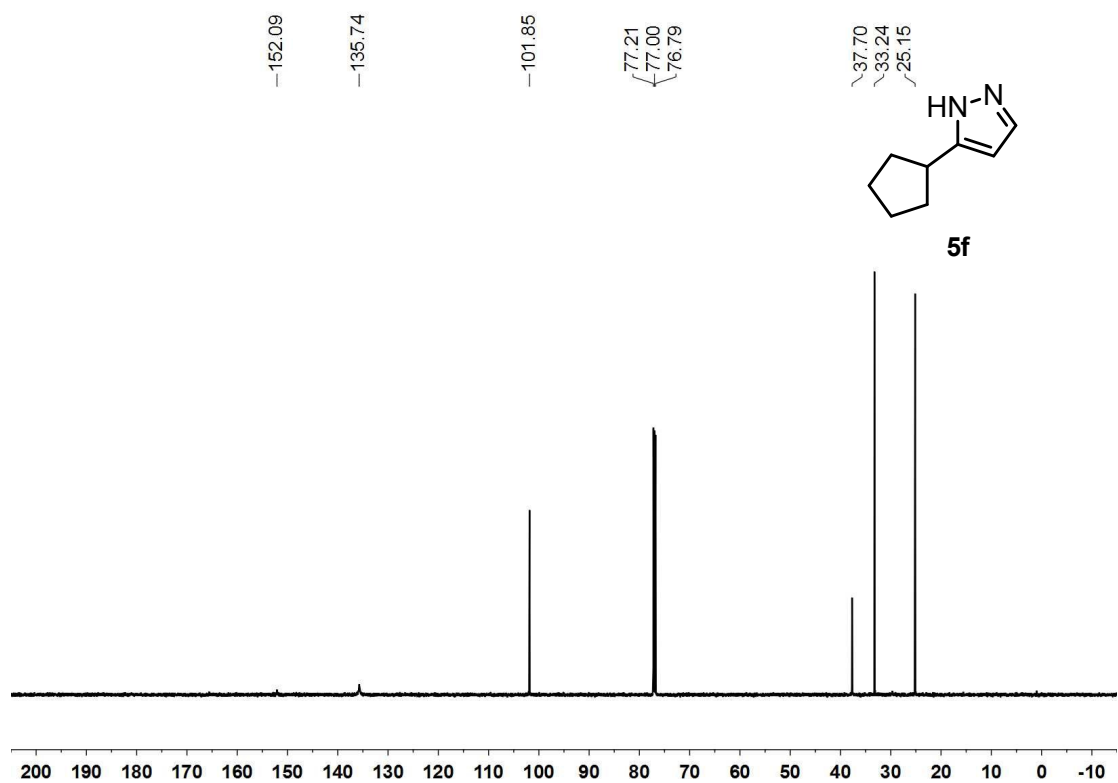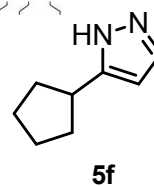

**5g** <sup>1</sup>H-NMR (500 MHz, CDCl<sub>3</sub>) & <sup>13</sup>C-NMR (CDCl<sub>3</sub>, 125 MHz)

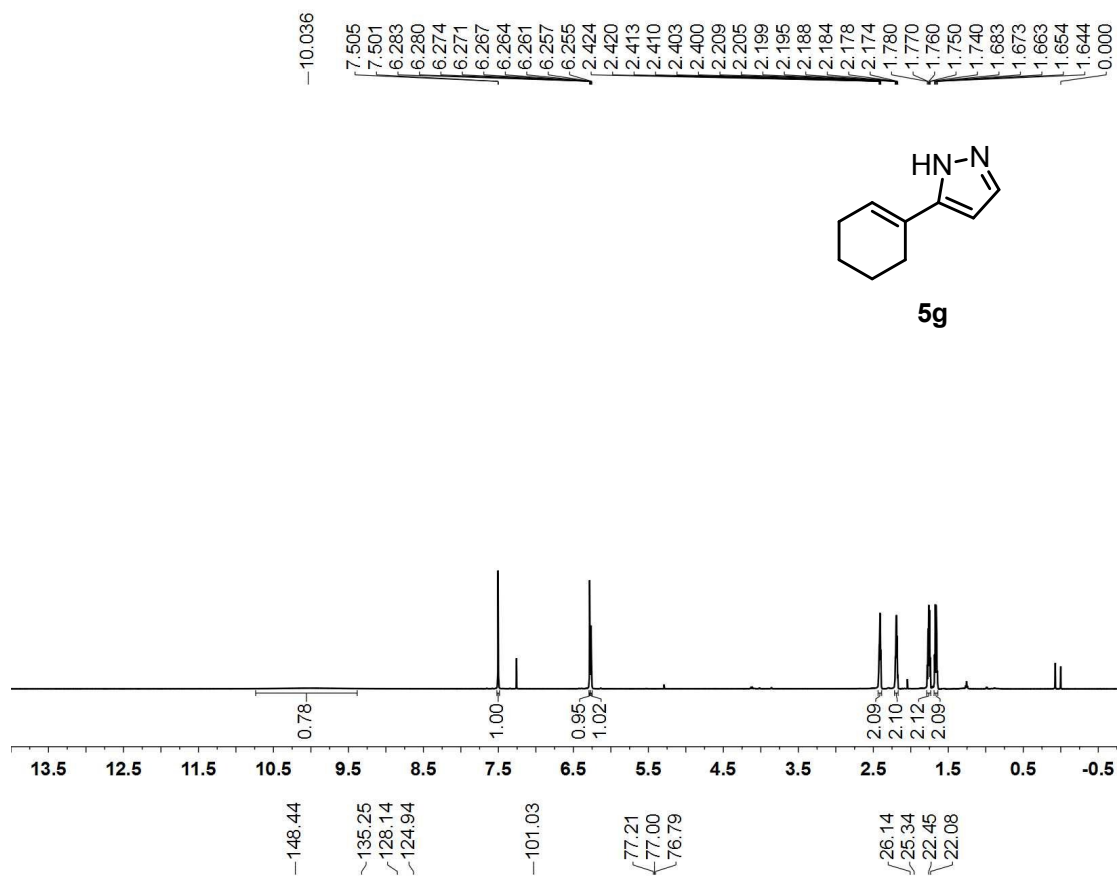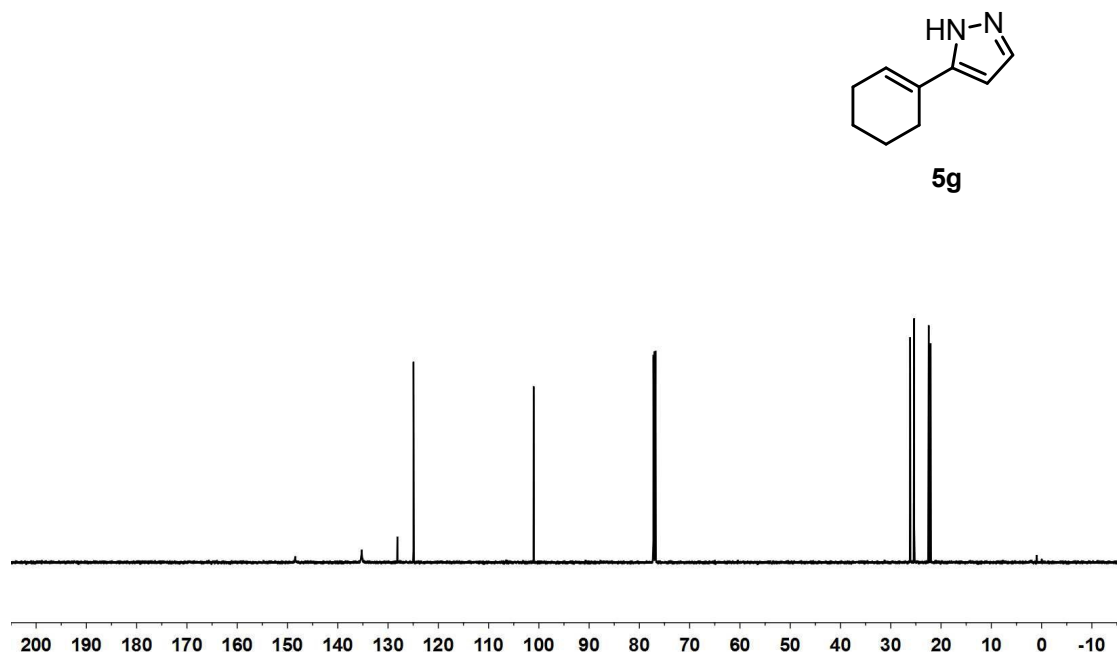

5h <sup>1</sup>H-NMR (600 MHz, CDCl<sub>3</sub>) & <sup>13</sup>C-NMR (CDCl<sub>3</sub>, 150 MHz)

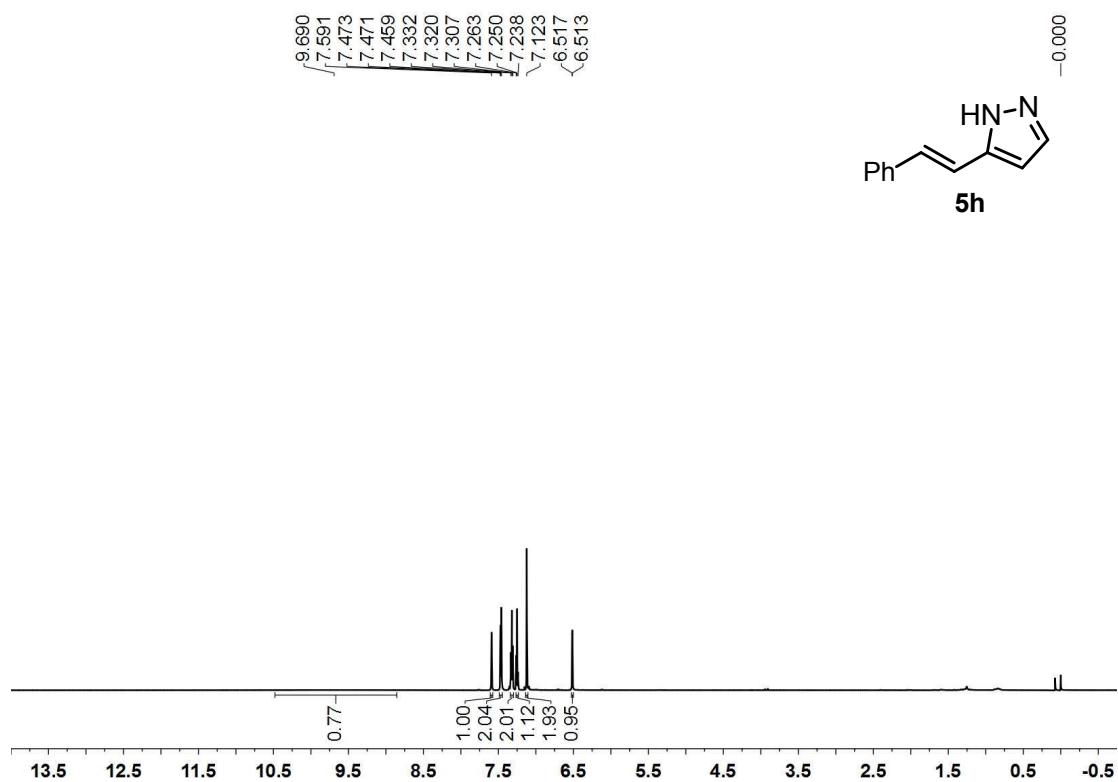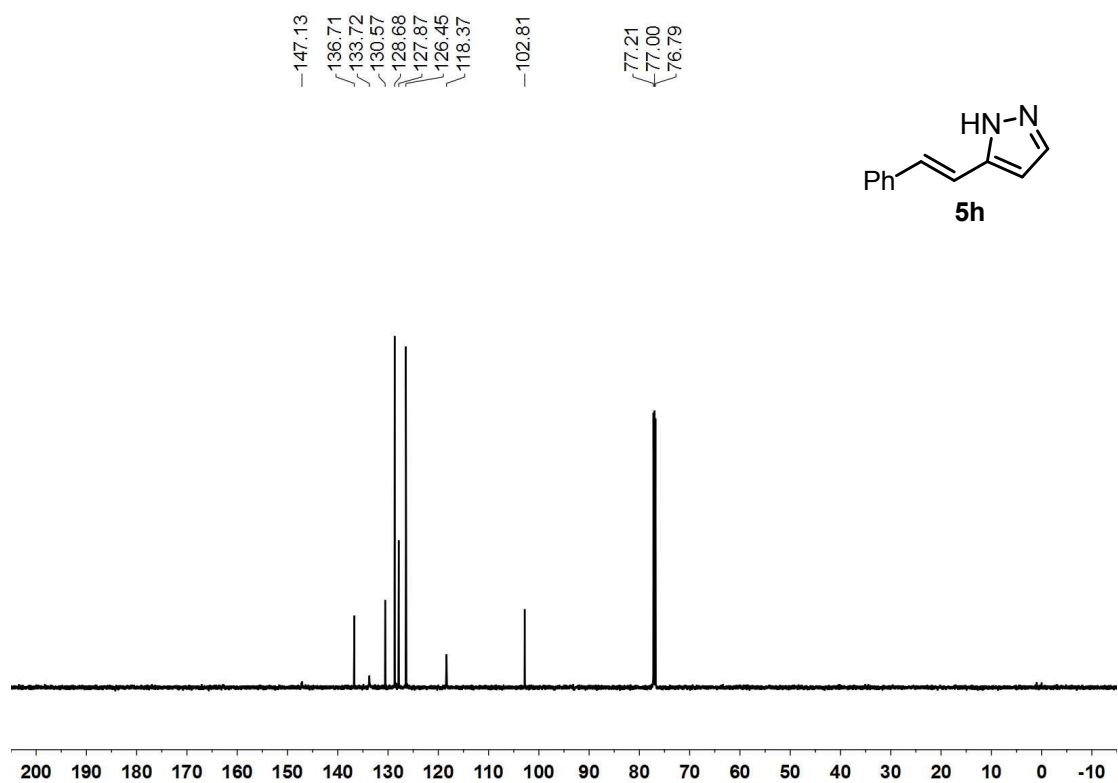



5i <sup>1</sup>H-NMR (600 MHz, CDCl<sub>3</sub>) & <sup>13</sup>C-NMR (CDCl<sub>3</sub>, 150 MHz)

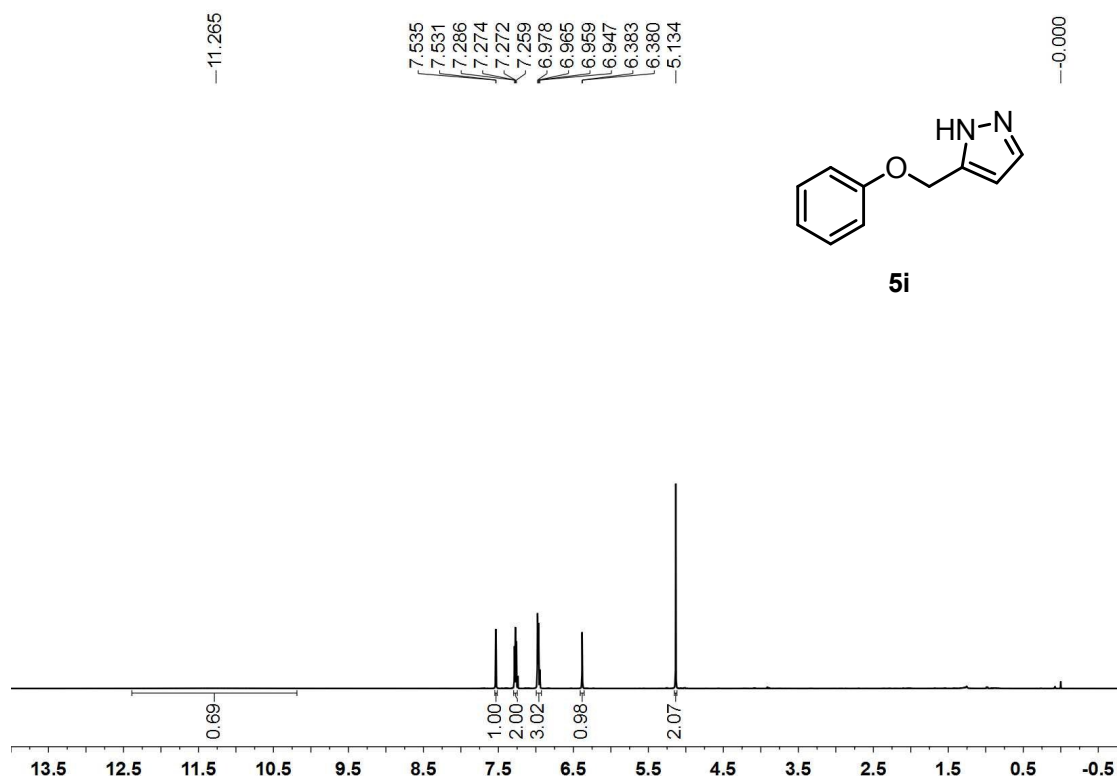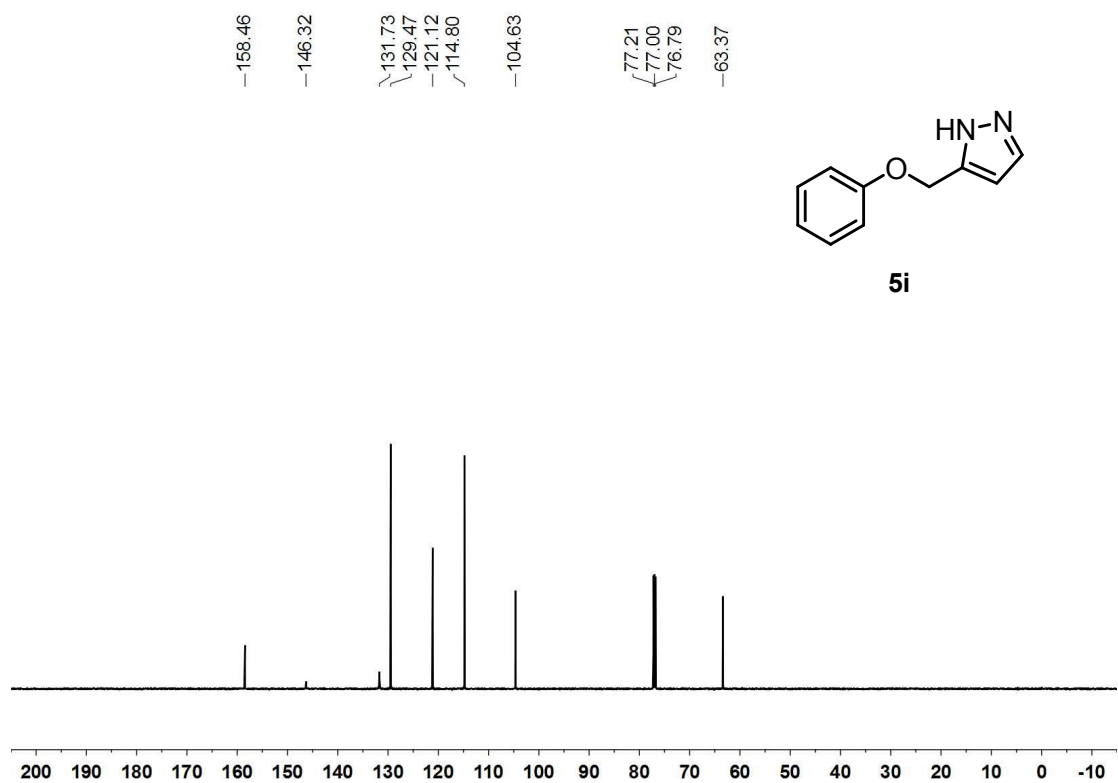

5j <sup>1</sup>H-NMR (600 MHz, CDCl<sub>3</sub>) & <sup>13</sup>C-NMR (CDCl<sub>3</sub>, 150 MHz)

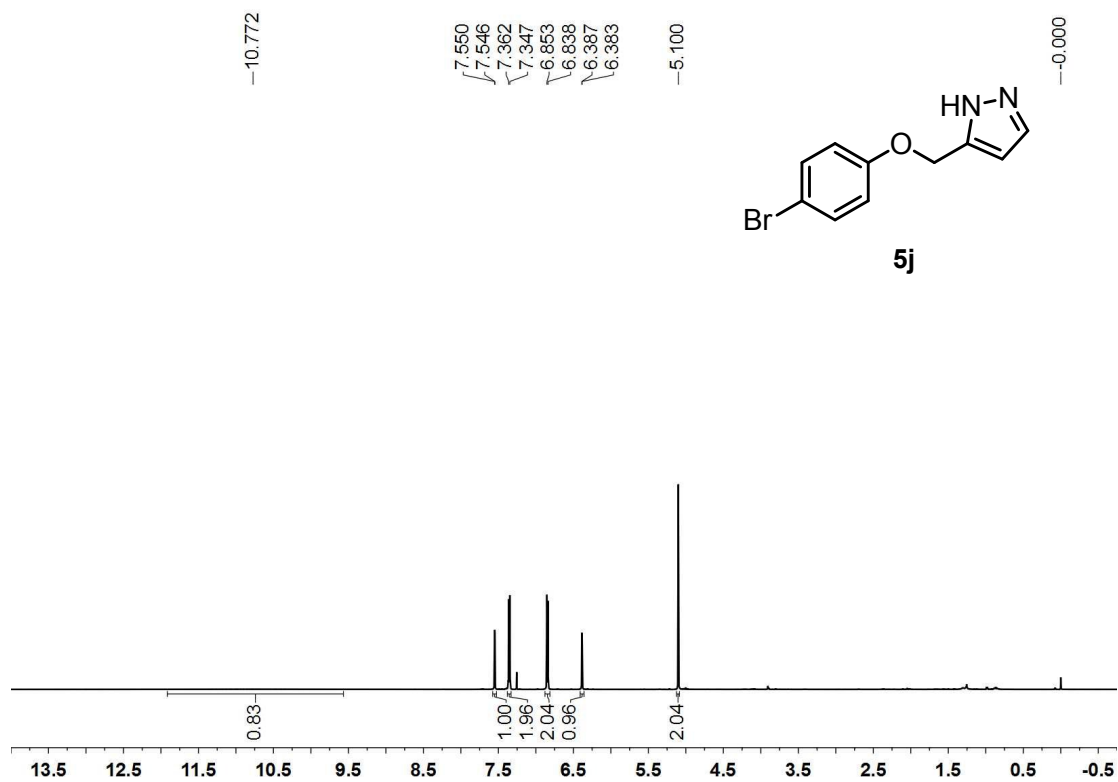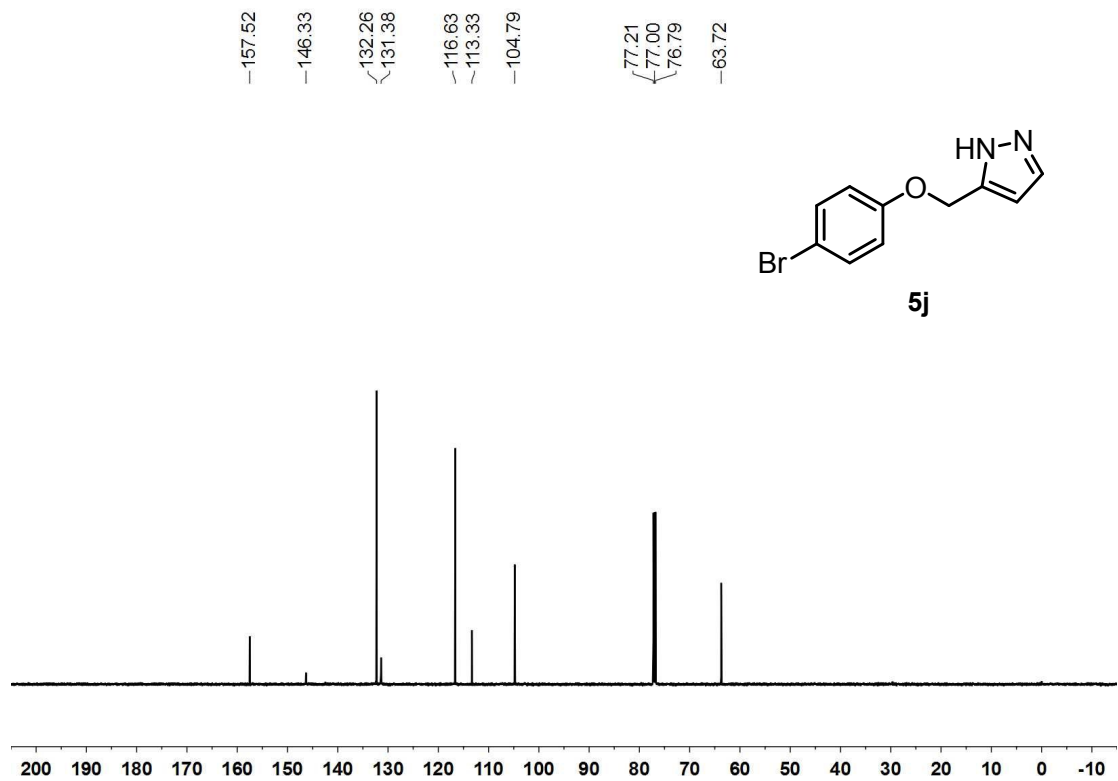

5k <sup>1</sup>H-NMR (600 MHz, CDCl<sub>3</sub>) & <sup>13</sup>C-NMR (CDCl<sub>3</sub>, 150 MHz)

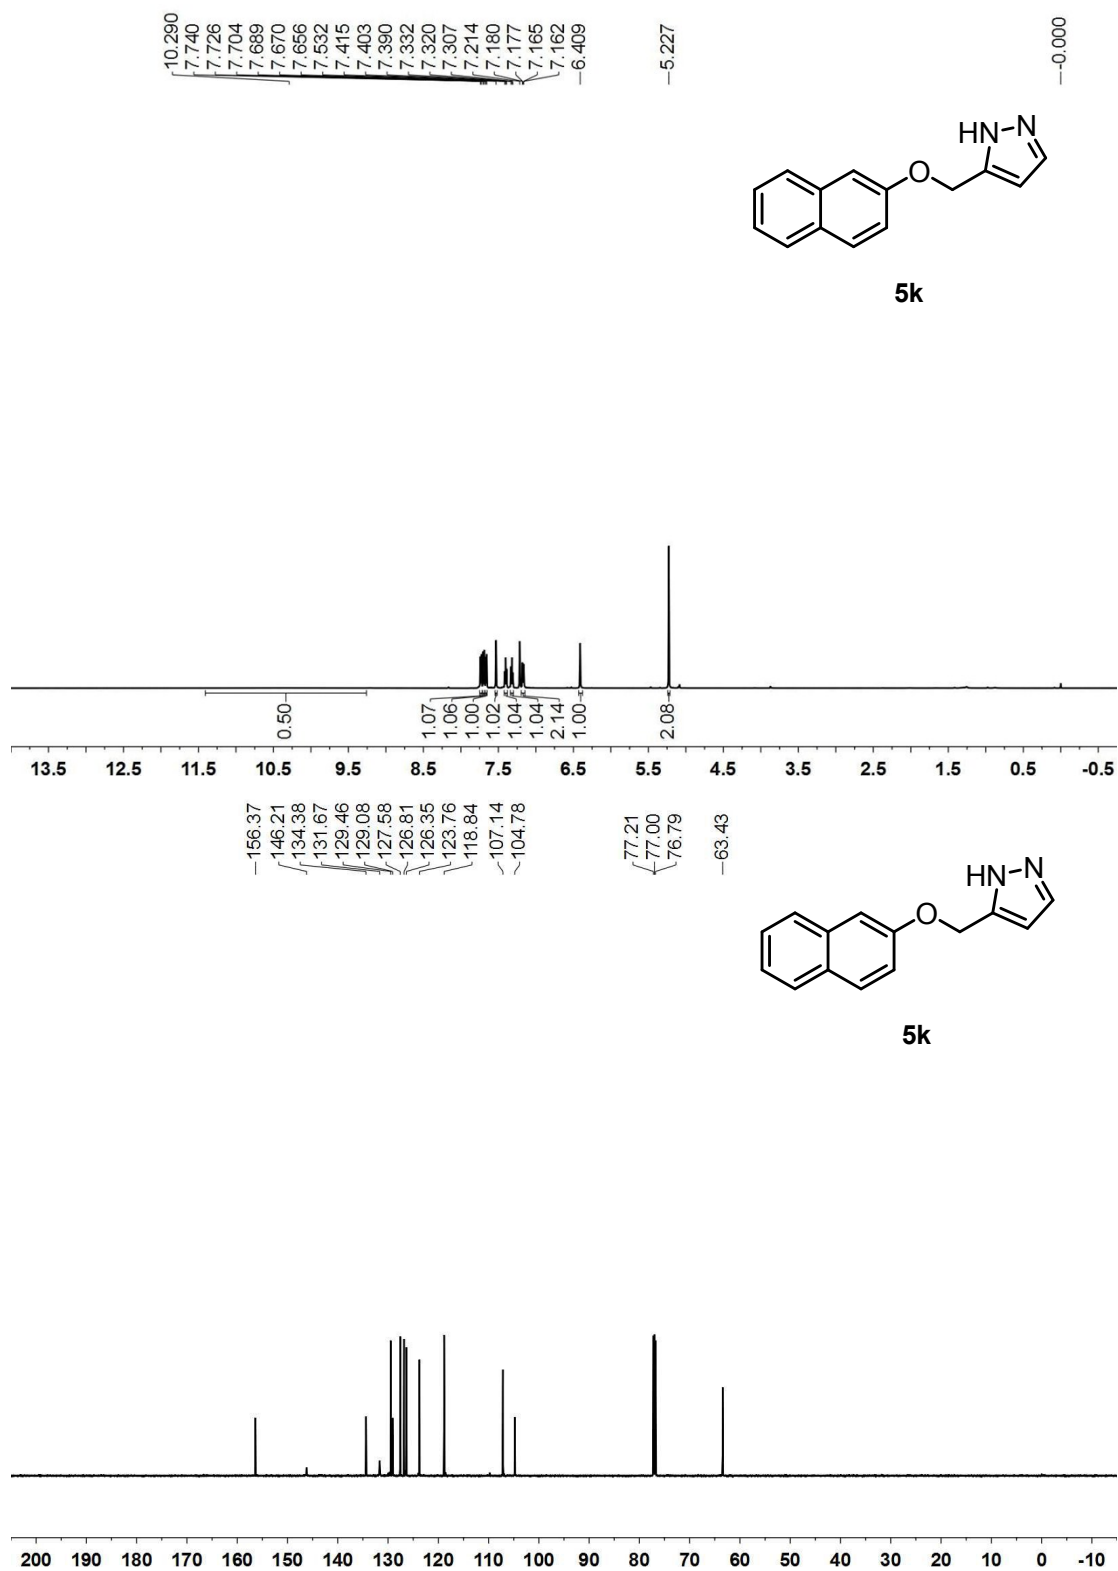

[D]-3a <sup>1</sup>H-NMR (600 MHz, CDCl<sub>3</sub>)

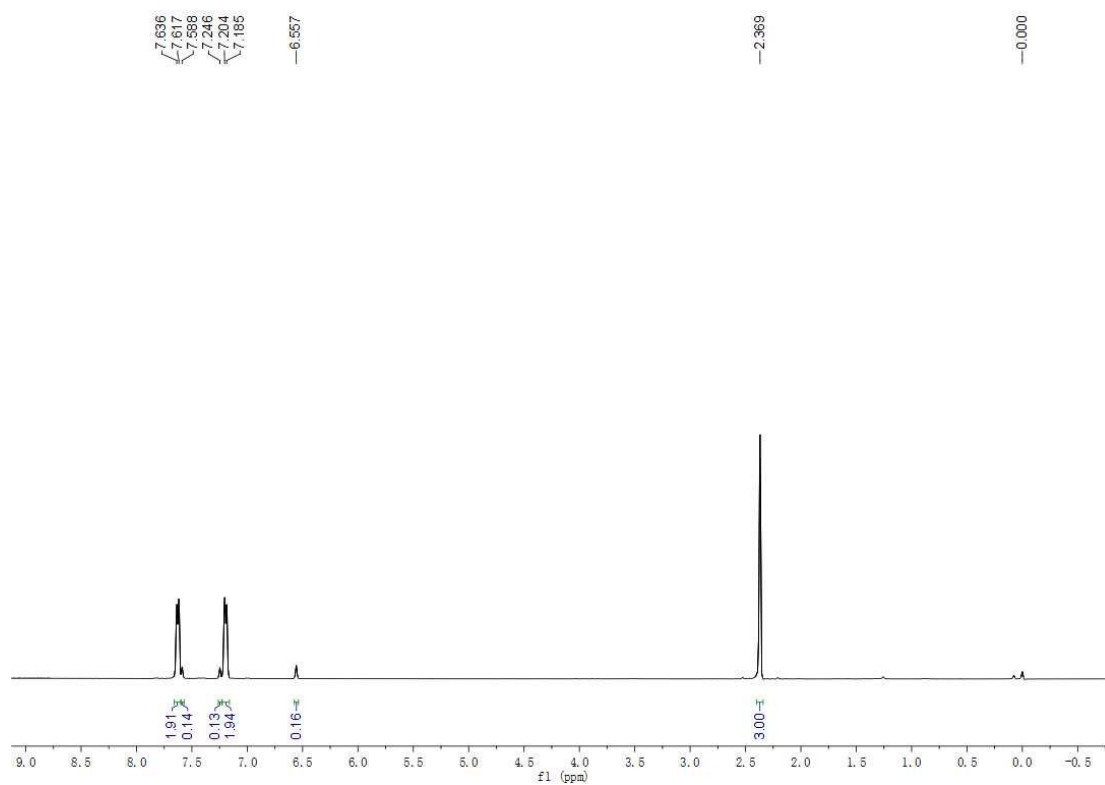

Supplement: c9cc03363g1.pdf [file c9cc03363g1.pdf]
